# Supplementary material for: Factors associated with healthcare workers willingness to participate in disasters: a cross-sectional study in Sana’a, Yemen
Source: PubMed Central journal article supplement — BMJ Open. 2019 Oct 17;9(10):e030547. doi: 10.1136/bmjopen-2019-030547 (PMC6803075; doi:10.1136/bmjopen-2019-030547), 2019-10-17
Supplement: bmjopen-2019-030547.draft_revisions.pdf [file bmjopen-2019-030547.draft_revisions.pdf]

# BMJ Open

BMJ Open is committed to open peer review. As part of this commitment we make the peer review history of every article we publish publicly available.

When an article is published we post the peer reviewers' comments and the authors' responses online. We also post the versions of the paper that were used during peer review. These are the versions that the peer review comments apply to.

The versions of the paper that follow are the versions that were submitted during the peer review process. They are not the versions of record or the final published versions. They should not be cited or distributed as the published version of this manuscript.

BMJ Open is an open access journal and the full, final, typeset and author-corrected version of record of the manuscript is available on our site with no access controls, subscription charges or pay-per-view fees (<http://bmjopen.bmj.com>).

If you have any questions on BMJ Open's open peer review process please email [info.bmjopen@bmj.com](mailto:info.bmjopen@bmj.com)

# BMJ Open

## Factors Associated with Healthcare Workers Willingness to Participate in Disasters in Sana'a, Yemen

|                               |                                                                                                                                                                  |
|-------------------------------|------------------------------------------------------------------------------------------------------------------------------------------------------------------|
| Journal:                      | <i>BMJ Open</i>                                                                                                                                                  |
| Manuscript ID                 | bmjopen-2019-030547                                                                                                                                              |
| Article Type:                 | Original research                                                                                                                                                |
| Date Submitted by the Author: | 05-Apr-2019                                                                                                                                                      |
| Complete List of Authors:     | Al-Hunaishi, Weiam; University of Malaya, Department of Social and Preventive Medicine<br>Hoe, Victor; Universiti Malaya<br>Chinna, Karuthan ; Universiti Malaya |
| Keywords:                     | Disaster preparedness, willingness, self-efficacy, interpersonal, healthcare worker                                                                              |
|                               |                                                                                                                                                                  |

SCHOLARONE™  
Manuscripts

1  
2  
3  
4  
5 **Factors associated with Healthcare Workers Willingness to Participate in Disasters in**  
6  
7 **Sana'a, Yemen**  
8  
9

10 **Authors' names, credentials/degrees, email addresses and institutional affiliations:**  
11

- 12  
13 1. **MPH. MD. Weiam Al-Hunaishi:** Department of Social & Preventive Medicine, Faculty of  
14 Medicine, University of Malaya, Kuala Lumpur, Malaysia. (e-mail: waam59@hotmail.com)  
15  
16  
17 2. **Prof. Dr. Victor CW Hoe:** Centre for Occupational and Environmental Health, Department  
18 of Social & Preventive Medicine, Faculty of Medicine, University of Malaya, Kuala Lumpur,  
19 Malaysia. (e-mail: victor@ummc.edu.my)  
20  
21  
22 3. **Associate Prof. Dr. Karuthan Chinna:** Julius Centre University of Malaya, Department of  
23 Social and Preventive Medicine, Faculty of Medicine, University of Malaya, Kuala Lumpur,  
24 Malaysia. (e-mail: karuthan@um.edu.my)  
25  
26  
27  
28  
29  
30

31 **Correspondence and reprint requests:** to Weiam Al-Hunaishi (e-mail: [Waam59@hotmail.com](mailto:Waam59@hotmail.com),  
32 telephone number: +60173479802, mail address: Department of Social and Preventive Medicine  
33 Faculty of Medicine, University of Malaya 50603 Kuala Lumpur, Malaysia).  
34  
35  
36  
37

38 **List of Abbreviations:**  
39

|    |     |                     |
|----|-----|---------------------|
| 40 |     |                     |
| 41 | CI  | Confidence Interval |
| 42 |     |                     |
| 43 | HCW | Healthcare workers  |
| 44 |     |                     |
| 45 | IQR | Interquartile range |
| 46 |     |                     |
| 47 | SD  | Standard Deviation  |
| 48 |     |                     |
| 49 |     |                     |
| 50 |     |                     |
| 51 |     |                     |
| 52 |     |                     |
| 53 |     |                     |
| 54 |     |                     |
| 55 |     |                     |
| 56 |     |                     |
| 57 |     |                     |
| 58 |     |                     |
| 59 |     |                     |
| 60 |     |                     |

## Abstract

**Objectives:** Willingness to participate in disasters has been indicated as a principal issue when overlooked. Hence, it requires addressing during disaster preparedness training courses to insure health service coverage. The study aims to assess healthcare workers (HCW) willingness to participate in biological and natural disasters, and its associated factors.

**Design:** This is a cross-sectional study, in which a self-administered questionnaire was distributed to 1093 HCW. The data was analysed using multiple logistic regression with significance level  $p < 0.05$ . Ethical clearance and consent of the participants were duly obtained.

**Setting:** In three public Hospitals that provide tertiary level healthcare, in Sana'a City, Yemen.

**Participants:** Nurses and doctors (HCW).

**Results:** There were 692 (response rate 63.3%) completed the questionnaire, of which 55.1% were nurses and 44.9% were doctors. The study found that self-efficacy was associated with willingness to participate in disaster response for any type of disasters (Odds Ratio [OR]=1.328, 95% Confidence Interval [95%CI]: 1.206 to 1.464), natural disasters (OR=1.138, 95%CI: 1.064 to 1.217), and influenza pandemic (OR=1.112, 95%CI: 1.049 to 1.180). The results further show that willingness is associated with HCW being young, male and having higher educational qualifications.

**Conclusion:** Self-efficacy has been found to be an important factor associated with willingness. Improving self-efficacy through training in disaster preparedness may increase willingness of HCW to participate in disaster.

**Key words:** Disaster preparedness; willingness; self-efficacy; interpersonal; healthcare worker.

### Strength and limitations of this study

- This study is the first study that attempt to assess HCW willingness to participate in different types of disasters in Sana'a City, Yemen.
- Willingness levels were found to be different in different type of disasters; the lowest willingness rate was in influenza pandemic, which considered concerning in the fragile state of Yemen and the increased number of outbreaks in the country.
- The study was survey based, using a convenience sample, however, it represented HCW in Sana'a City in term of gender and living city.
- The study data was a conversion of Likert data to binary data, so there might be some degree of bias.
- Beside the limitations that result from employing a cross-sectional design in the study, it was conducted in a city with considerable political unrest, therefore, a subsequent study is recommended.

## Introduction:

In various parts of the world, disasters destroyed communities and infrastructures, causing huge material and human losses.<sup>1</sup> Similarly, hospitals and health centres are also affected by the disasters, which restrict its work of relieving the disaster-stricken community. Disasters is defined as “a situation or event which overwhelms local capacity, necessitating a request to a national or international level for external assistance; an unforeseen and often sudden event that causes great damage, destruction and human suffering”.<sup>2</sup> By 2025, more than half of world population will live in cities, particularly in urban cities located along a seismic fault lines, flood and other natural disasters prone areas.<sup>3</sup>

According to the Global Facility for Disaster Reduction and Recovery (GFDRR), Yemen is one of the priority countries in the Middle East and North Africa region, mainly due to its vulnerability to disasters.<sup>4-6</sup> Natural disasters are recurrent in Yemen, which includes storms, landslides, earthquake and floods., Floods due to the monsoonal rainfall, is responsible for the majority of the mortality due to disaster, this is followed by storms and landslides as repeated disasters.<sup>6</sup> Currently in Yemen disaster management only mainly focuses on responding to post disasters damage and there is a lack of disaster preparedness such training and mock drills. The insufficient training makes it difficult to maintain preparedness.<sup>4,7,8</sup>

During disasters, HCW are expected to provide health care assistance to people suffering from the disasters alongside with caring for their usual patients. Some are also required to care for their dependents. Most of the previous studies reported an anticipated decrease in health workforce during disaster as not all HCW are willing to participate in a disaster. Systematic reviews have found that willingness was associated with factors like the nature and type of event; competing obligations between personal and professional needs; the

1  
2  
3 work environment and climate including personal safety; and the relationship between  
4  
5 knowledge and perceptions of efficacy.<sup>9,10</sup>  
6  
7

8  
9  
10 Disaster preparedness activities and routine disasters trainings has been found to  
11 improve knowledge, skills and attitude preparedness of disaster.<sup>11</sup> However, the factors that  
12 affect willingness to participate in disasters are beyond just having knowledge on disasters  
13 management.<sup>9-12</sup>  
14  
15  
16

17  
18 In a recent systematic review, they found that only few researches have been  
19 conducted in the Middle East on willingness to participate in disasters. They recommend that  
20 further research should be conducted based on behavioural theories to better understand the  
21 Middle East context of willingness to participate in a disaster.<sup>13</sup> In another systematic review  
22 of 70 studies on HCW willingness to participate in disasters only 12 studies were form Asia  
23 and none of those studies was from the Middle East.<sup>12</sup> Therefore, the objective of this study is  
24 to determine the associations between socio-demographic, professional, and intrapersonal  
25 factors associated with doctors' and nurses' willingness to participate in disasters in response  
26 in Sana'a, Yemen.  
27  
28  
29  
30  
31  
32  
33  
34  
35  
36  
37  
38

## 39 **Methods:**

### 40 **Study design, population and instrument**

41  
42  
43  
44  
45 This is a cross-sectional study conducted in three public hospitals in the Sana'a  
46 Governorate, Yemen; Al-Thora, Al-Jumhuri, and Al-Kuwait hospitals, which have a more  
47 than total of 4000 nurses and doctors which were included in this study. Out of this 1093  
48 HCW were selected through convenient sampling by approaching the healthcare providers  
49 individually. The sample size of 1093 was determined based the "perception of responsibility  
50 to participate", which is an element of the self-efficacy construct. The determined sample size  
51  
52  
53  
54  
55  
56  
57  
58  
59  
60

1  
2  
3 was 614, which was inflated by 78 percent based on the response rate of the previous  
4  
5 studies.<sup>14</sup>  
6  
7

8 The questionnaire was developed by the researcher based on information from  
9  
10 previous studies and opinion of national and international experts.<sup>14-17</sup> The questionnaire was  
11  
12 pilot tested on doctors and nurses from a different hospital; additional feedback from local  
13  
14 experts was sort, to ensure adequate coverage and understanding of key topics items on the  
15  
16 questionnaire. The questionnaire consists of socio-demographic, professional, and  
17  
18 intrapersonal factors, and willingness to participate in a disaster. The professional,  
19  
20 intrapersonal and willingness questions was measured on a five-point Likert scale (1=  
21  
22 strongly disagree, 2= disagree, 3=somewhat agree, 4= agree, and 5= strongly agree). A binary  
23  
24 variable was created based on “less or equal two” as low and “more than 2” as high.  
25  
26  
27  
28

29 There were four items in the self-efficacy construct. The descriptive statistics and  
30  
31 inter-item correlation values of the self-efficacy are presented in Table 1.  
32  
33

34  
35 [\[Table 1\]](#)  
36  
37

38 Based on Table 1, there was moderate level of agreement in all the four items. The  
39  
40 highest correlation for each item with at least one other item in the construct was between 0.3  
41  
42 and 0.9. in factor analysis, the Kaiser-Meyer-Olkin (KMO) value was 0.658 ( $p < 0.001$ ). A  
43  
44 single factor was formed from the four items computed and was saved as incentive to be used  
45  
46 in further analysis. Accordingly, to calculate the self- efficacy, four questions was asked. The  
47  
48 sum outcome of the four answers ranged from 4 to 20 (Median 16, Interquartile range [IQR]  
49  
50 5).  
51  
52  
53

54 Self-efficacy theory was chosen to build the construct as it illustrates beliefs that  
55  
56 drives actions to face and solve problems faced to achieve goals. In case of disaster, the  
57  
58 theory could be applied to as HCW coping with fear and threat and adapting new behaviours  
59  
60



1  
2  
3 because of their beliefs in their competences. This belief is derived from their successful  
4 performances, observing colleagues and managers positive behaviour, convincing by a  
5 superior person, and calming the physiological and emotional pressure caused by the threat.<sup>18</sup>  
6  
7  
8  
9  
10  
11  
12

### 13 **Data collection**

14  
15  
16 Ethical approval was obtained from the Ministry of Health and Population of Yemen.  
17  
18 Informed consent was obtained from the respondent and confidentiality of personal  
19 disclosures was re-assured. The self-administered questionnaires were distributed and  
20 retrieved between February and March 2018. A final 767 questionnaires were returned for  
21 analyses; 75 questionnaires were omitted due to missing values.  
22  
23  
24  
25  
26  
27  
28  
29  
30

### 31 **Statistical analysis**

32  
33 The data was analysed using Statistical Package for Social Science (SPSS) version 22.  
34  
35 Descriptive outputs were generated describing the median, interquartile range, frequency  
36 counts and percentages. Chi square test and multiple logistic regression was performed to test  
37 the hypothesis of the study on  $p < 0.05$  for all statistical tests. The variables selected to be  
38 included in the multivariate analysis were variables with  $p < 0.25$  in the univariate analysis,  
39 and gender, age, and type of profession were also included.  
40  
41  
42  
43  
44  
45  
46  
47

### 48 **Patient and Public Involvement**

49  
50  
51 Patients and the general public were not involved in the design of this research. HCW  
52 were involved during the pilot study in order to test the understanding of the written  
53 questionnaire. In addition, the data was access by limited number of the research team.  
54  
55  
56  
57  
58  
59  
60

## Results:

### Socio-demographics Characteristics

Responses are collected from 692 HCW (response rate 63.3%), where 311 (44.9%) are doctors and 381 (55.1%) nurses. Most of the female participants are nurses 64.5%. More than half of the doctors (56.6%) have more than five years of experience at their current place of work, as compare to only 40.9 per cent of the nurses. The average age of participants is 31.96 (Standard Deviation [SD] 7.46) years across the two occupations. Out of the 65.9% who have dependents, i.e., child or elderly persons, 73.9% reported to have support to care for their dependent in a case of disaster. The percentages are almost equally distributed among doctors and nurses.

### Professional and Intrapersonal Characteristics

Table 2 describes the socio-demographic, professional, interpersonal, and willingness characteristics of respondents. Only 39.2% of the HCW had have any previous training in disaster. This is the same for previous work experience, where only 35.8% of the participants had previous work experience in a disaster situation.

The doctors and nurses report a high trust in work safety, in family, in colleague's preparedness to react, and in hospital preparedness to react in case of a disaster, with trust in colleague's preparedness as the highest percentage (88.3%). Similarly, HCW have a high median score (16; IQR 2) in self-efficacy construct.

### Respondents willingness

Ninety percent of the participants express high willingness to participate in any type of disasters. However, they were less willing to participate in natural disasters (77.3%) and influenza pandemic (66.0%) (Table2).

[[Table 2](#)]

### Factors associated with willingness to participate in any type disaster

There was an association between participants' gender and willingness to participate in any type of disaster, with male being more willing compared to female (crude OR=2.161, 95%CI: 1.307 to 3.573) (Table 3). Those with high trust in work safety (crude OR=3.284, 95%CI: 1.937 to 5.567), trust in colleague's preparedness (crude OR=2.592, 95%CI: 1.401 to 4.795) and self-efficacy (crude OR=1.358; 95%CI: 1.247 to 1.479) were also found to be more willing to participate in any type of disaster in the univariate analysis (Table 3).

In the final model, having trust in work safety (adjusted OR=2.535, 95%CI: 1.357 to 4.736) and self-efficacy (adjusted OR=1.319, 95%CI: 1.197 to 1.453) were found to be associated with general willingness with any type of disasters (Table 4).

### Factors associated with willingness to participate in natural disaster

In the univariate analysis, there was an association between some of the socio-demographic characteristics (age, gender, education level, type of profession and work duration) with willingness to participate in natural disasters (Table 3). Participants with bachelor and postgraduate degrees has a higher odd of willingness to participate in natural disaster compared to those with diploma education. Those in the age group of

1  
2  
3 between 31 and 45 were found to be more willing when compared to participants that are 30  
4 years old and younger (Table 3). The main interpersonal factors associated with willingness  
5 in natural disasters were participants' trust in colleagues' preparedness in case of a natural  
6 disaster, and self-efficacy (Table 3).  
7  
8  
9  
10  
11

12  
13 In multivariate, being male (adjusted OR=1.639, 95%CI: 1.102 to 2.439) and self-  
14 efficacy (adjusted OR=1.143, 95%CI: 1.069 to 1.221) were significantly associated with  
15 willingness to participate in natural disasters (Table 4).  
16  
17  
18  
19  
20  
21  
22

### 23 **Factors associated with willingness to participate in influenza pandemic disaster**

24  
25 For willingness to participate in influenza pandemic, the univariate results reveal that  
26 being male, having a dependent with no support (compared to participants without  
27 dependent), having previous experience and self-efficacy were associated with willingness to  
28 participate in pandemic (Table 3).  
29  
30  
31  
32  
33  
34

35 In the final model, having previous experience (adjusted OR=1.528, 95%CI: 1.058 to  
36 2.207) and self-efficacy (adjusted OR=1.114, 95%CI: 1.050 to 1.182) were found to be  
37 associated with willingness to participate in influenza pandemic (Table 4).  
38  
39  
40  
41  
42

43 [\[Table 3, Table 4\]](#)  
44  
45  
46  
47  
48

### 49 **Discussion:**

50  
51 Having one hundred percent participation of HCW is difficult to obtain as much as it  
52 is vital in case of disasters. Previous studies suggested that between 65 and 97 percent of  
53 HCW were willing to participate in a natural disaster, and between 54 and 86 percent in an  
54 influenza pandemic.<sup>11,15,19,20</sup> The reason in this difference in the levels of willingness between  
55  
56  
57  
58  
59  
60

1  
2  
3 the two types of disasters is due to the great distinction in their nature. The outcome of the  
4 interaction between HCW and the socioenvironmental determinants of these disasters leads to  
5 having different willingness levels. According to Conner et al, the weighted risk resulting  
6 from this interaction plays a major role in HCW willingness. In case of pandemics, the fear of  
7 the inability to control biohazards and watching colleagues inquiring a communicable disease  
8 after contact with affected persons was a suggested reason for the low willingness levels.<sup>10</sup>  
9  
10 Another qualitative study in Australia highlighted that in different types of disasters  
11 emergency nurse's willingness to attend to work is shaped by the weighted risk to self and  
12 surrounding people and the pressure formed from the period dealing with the disaster.<sup>12</sup>  
13  
14 Natural disasters may not directly affect HCW or their families like influenzas pandemic  
15 which may be a reason for the higher level of willingness to attend to work compared to  
16 pandemics.  
17  
18  
19  
20  
21  
22  
23  
24  
25  
26  
27  
28  
29  
30

31 The findings of this study are consistent with the previous studies regarding their  
32 willingness level to different types of disasters. More HCW were willing to participate in  
33 natural disaster (77.3%) as compared to influenza pandemic (66.0%). Even though, there  
34 were a higher percentage of HCW willingness from this study to participate in both natural  
35 disaster and influenza pandemic were higher compared to other studies, Yemen's high  
36 vulnerability, due its topography and current economic, political and health status, could  
37 affect the country health status and cause huge adverse health impacts in case of disasters.  
38  
39 According to the Vulnerability Matrix, one third of Yemen's districts are highly vulnerable.<sup>5</sup>  
40  
41  
42  
43  
44  
45  
46  
47  
48  
49

50 In addition, due to the armed conflicts in Yemen that started in early 2015, it had  
51 become difficult to deal with any disaster in case it occurred. According to the World Health  
52 Organization (WHO), the healthcare system in Yemen is in a critical situation with about  
53 50% of the health facilities in Yemen are either partially or total damage as a result of the  
54 natural disasters and conflicts. Furthermore, of the 3507 healthcare facilities in Yemen,  
55  
56  
57  
58  
59  
60

1  
2  
3 almost 300 healthcare facilities have been destroyed.<sup>5,21</sup> Therefore, any possible decrease in  
4  
5 the health work force during disasters in Yemen must be put in considerations during  
6  
7 response to disasters. The existed drained health sector is based on a vulnerable health system  
8  
9 in term of its structure and healthcare staff number and distribution in the country.<sup>22</sup> Thus,  
10  
11 training and preparing healthcare staff to act during disasters is critical and could help  
12  
13 achieving Priority 4 in the United Nations' Sendai Framework for Disaster Risk Reduction  
14  
15 2015- 2030 in enhancing disaster preparedness for effective response and to "Build Back  
16  
17 Better" in recovery, rehabilitation and reconstruction of disasters, and prevent any possible  
18  
19 humanitarian catastrophe.<sup>23</sup>

24  
25 The results show that willingness to participate in events of natural disasters may be  
26  
27 encouraged by many suggested factors. Factors such as respondents being male are  
28  
29 accompanied with higher willingness to participate in natural disasters. which is similar to  
30  
31 previous studies conducted in Jordan, China and United nations of America.<sup>14,15,24,25</sup>  
32  
33 However, having less female health workers willing to participate in disasters highlight a  
34  
35 need to address this group during health preparedness programs. This lack in female HCW  
36  
37 willingness could be due to the gender and cultural barriers in Yemen. These barriers need to  
38  
39 be addressed to better motivate females' workers participation in case of disasters. This is  
40  
41 important area for research as studies on willingness moving forward.  
42  
43

44  
45 As in previous studies, nurses and doctors with previous experience in influenza  
46  
47 pandemic are more willing to participate in influenza pandemic.<sup>24,26</sup> HCW which has  
48  
49 experience with a previous disaster have better knowledge in disaster management, coping  
50  
51 strategies, and ways to protect themselves and their families; which may be a reason for  
52  
53 having higher odds of willingness. According to Alzahrani et al., Most of the nurses have a  
54  
55 higher level in Mass gatherings management such as communicating effectively during  
56  
57 emergencies in Saudi Arabia due to Previous experience, he also found a need for further  
58  
59  
60

1  
2  
3 trainings by the nurses.<sup>27</sup> Chokahi et al., found that simulation training, attending conferences  
4 and previous experience of increase paediatric surgeons feeling of preparedness.<sup>26</sup>  
5  
6  
7

8 This study found that trust in work safety during any type of disaster play key role in  
9 willingness to participate, which is similar to results from previous studies.<sup>11,24,28</sup> Work safety  
10 is important in order for HCP to feel safe and do their work, a study by Stergachis et al, found  
11 that majority of the participants reported their fear or concern for self in case of influenza  
12 pandemic and during earthquake scenarios as one of the major barriers to willingness.<sup>29</sup>  
13 Considering work safety in disaster preparedness is especially important in Yemen after  
14 notifications made by Aldahrai et al. and Naser et al. on the current low work place safety  
15 and the needs of increasing safety and security standards in hospitals in Yemen Health  
16 establishments, regardless to external or internal catastrophes; unsafe work place could lead  
17 to increase optional absenteeism during disaster.<sup>7,8</sup> Thus, putting information on work safety  
18 and protection devices provided during several types of disasters is advisable.  
19  
20  
21  
22  
23  
24  
25  
26  
27  
28  
29  
30  
31  
32  
33

34 Many studies have established the association between self-efficacy and willingness  
35 to participate in disasters in previous.<sup>10,14,15</sup> Similarly, this study have identified that self-  
36 efficacy plays an important role in willingness to participate in natural disasters, in influenza  
37 pandemic and any type of disasters. It indicates that elements tested for self-efficacy like  
38 participants increase familiarity with their role, responsibility to react, and confidence of  
39 ability to deal with various types of disasters could be a key factor to increase HCP self-  
40 efficacy, thus, increase their willingness. Disaster preparedness trainings are encouraged to  
41 contain materials that explain response to different type of disasters, doctors' and nurses' role  
42 in disasters and how it makes a different in response to disasters. Supportive measures to  
43 increase HCW self-efficacy such as immediate communication with needed information and  
44 rewarding for efforts in disasters are suggested.  
45  
46  
47  
48  
49  
50  
51  
52  
53  
54  
55  
56  
57  
58  
59  
60

## Strength and limitation

Regardless of the limitation of this study, it had substantial strengths. It is the first study explored the patterns of the willingness status in the Yemen and the factors associated with it. Also, study was distributed in person to the HCP to ensure obtaining higher response rate. In addition, it was using self-administered questionnaire to minimise information bias such as interviewer bias.

This study had limitations, as the study was performed under a political insecurity/fragile state of the country a list of workers of HCP working at the hospitals was difficult to obtain. As a result, a universal sample was undertaken which could limit the study representativeness. Other than the self-administered questionnaire limitations, the study findings are limited to staff working at the tertiary level public hospitals in urban areas of Yemen.

## Conclusion:

Increased the likelihood of willingness to participate in disaster play a key role in guarantee optimum number of work force. This study indicates that one's socio-demographic, professional and intrapersonal factors plays a role in increase his/her willingness in general and across different type of disasters. Significant differences were revealed between participants' willingness in natural disasters by gender and self-efficacy, and participant's willingness in influenza pandemics by previous experience and self-efficacy. This result suggests integrating disaster management into an earlier education levels of doctors' and nurses' educational establishments. Other areas for preparedness may include increase hospitals safety and resilience; Hence that willingness to participate in natural disasters' response was influence by demographic characteristic of the healthcare personnel, others



1  
2  
3 found outside the bracket should be motivated to participate with a reward package such as  
4  
5 incentives and hazard allowance. Further studies should be conducted in both urban and rural  
6  
7 settings with relatively peaceful atmosphere.  
8  
9

10  
11  
12  
13 **Acknowledgement:** We thank Dr. Susan Connor, Dr. Karen Hammad and  
14  
15  
16 Dr..Mohammed Khalil for their Support and advice during the study development, all  
17  
18 University Malaya academic staff, the team who collected the data, and all the participants  
19  
20 who contributed in this study.  
21  
22

23  
24 **Competing interests:** The authors have no financial disclosures to declare and no  
25  
26 conflicts of interest to report.  
27  
28

29  
30 **Funding:** This research did not receive any specific grant from funding agencies in the  
31  
32 public, commercial, or not-for-profit sectors.  
33  
34

35  
36 **Data sharing statement:** No additional data are available.  
37  
38

#### 39 40 **Reference:**

- 41  
42  
43 1. United Nations Economic and Social Commission for Asia and the Pacific  
44 (UNESCAP). Disasters in Asia and the Pacific: 2015 year in review. United Nations  
45 report Economic and social commission for Asia and the Pacific 2015.  
46  
47
- 48  
49 2. Below R, Wirtz A, Guha-Sapir D. Disaster category classification and peril  
50 terminology for operational purposes. 2009.  
51  
52
- 53  
54 3. United Nations Office for Disaster Risk Reduction (UNISDR). (2012). Making  
55 cities resilient report 2012. Available from:  
56 [http://www.unisdr.org/files/28240\\_rcreport.pdf](http://www.unisdr.org/files/28240_rcreport.pdf).  
57
- 58  
59 4. Environment MoWa. Yemen: National progress report on the implementation of the  
60 Hyogo Framework for Action (2013-2015). 2015.

- 1  
2  
3 5. World Health Organization. WHO annual report 2017: Yemen. Cairo: WHO  
4 Regional Office for the Eastern Mediterranean; 2018. Licence: CC BYNC-SA 3.0  
5 IGO.  
6  
7
- 8  
9 6. The International Bank for Reconstruction and Development / The World Bank.  
10 Natural Disasters in the Middle East and North Africa: A Regional Overview. 2014.  
11
- 12  
13 7. Aladhrai SA, Djalali A, Della Corte F, Alsabri M, El-Bakri NK, Ingrassia PL.  
14 Impact of the 2011 Revolution on Hospital Disaster Preparedness in Yemen.  
15 Disaster Medicine and Public Health Preparedness. 2015;9(4):396-402.  
16
- 17  
18 8. Naser WN, Ingrassia PL, Aladhrae S, Abdulraheem WA. A Study of Hospital  
19 Disaster Preparedness in South Yemen. Prehospital and Disaster Medicine.  
20 2018;33(2):133.  
21
- 22  
23 9. Chaffee M. Willingness of health care personnel to work in a disaster: an integrative  
24 review of the literature. Disaster Medicine and Public Health Preparedness.  
25 2009;3(1):42-56.  
26
- 27  
28 10. Connor SB. When and why health care personnel respond to a disaster: the state of  
29 the science. Prehospital and Disaster Medicine. 2014;29(3):270-4.  
30
- 31  
32 11. Gowing JR, Walker KN, Elmer SL, Cummings EA. Disaster Preparedness among  
33 Health Professionals and Support Staff: What is Effective? An Integrative Literature  
34 Review. Prehospital and Disaster Medicine. 2017;32(3):321-8.  
35
- 36  
37 12. Arbon P, Cusack L, Ranse J, Shaban RZ, Considine J, Kako M, et al. Exploring  
38 staff willingness to attend work during a disaster: a study of nurses employed in  
39 four Australian emergency departments. Australasian Emergency Nursing Journal :  
40 AENJ. 2013;16(3):103-9.  
41
- 42  
43 13. Ejeta LT, Ardalan A, Paton D. Application of Behavioral Theories to Disaster and  
44 Emergency Health Preparedness: A Systematic Review. PLOS Currents Disasters.  
45 2015;7. Doi: 10.1371/currents.dis.31a8995ced321301466db400f1357829.  
46
- 47  
48 14. Burke RV, Goodhue CJ, Chokshi NK, Upperman JS. Factors associated with  
49 willingness to respond to a disaster: a study of healthcare workers in a tertiary  
50 setting. Prehospital and Disaster Medicine. 2011;26(4):244-50.  
51  
52  
53  
54  
55  
56  
57  
58  
59  
60

15. Charney RL, Rebmann T, Flood RG. Hospital Employee Willingness to Work during Earthquakes Versus Pandemics. *Journal of Emergency Medicine*. 2015;49(5):665-74. Doi: <https://doi.org/10.1016/j.jemermed.2015.07.030>.
16. Balicer RD, Omer SB, Barnett DJ, Everly GS, Jr. Local public health workers' perceptions toward responding to an influenza pandemic. *BMC Public Health*. 2006;6:99.
17. Shapira S, Aharonson-Daniel L, Bar-Dayyan Y, Sykes D, Adini B. Knowledge, perceptions, attitudes and willingness to report to work in an earthquake: A pilot study comparing Canadian versus Israeli hospital nursing staff. *International Emergency Nursing*. 2016;25:7-12.
18. Bandura A. *Self-efficacy: The exercise of control*: Macmillan; 1997.
19. Arbon P, Ranse J, Cusack L, Considine J, Shaban RZ, Woodman RJ, et al. Australasian emergency nurses' willingness to attend work in a disaster: a survey. *Australasian Emergency Nursing Journal : AENJ*. 2013;16(2):52-7.
20. Brice JH, Gregg D, Sawyer D, Cyr JM. Survey of Hospital Employees' Personal Preparedness and Willingness to Work Following a Disaster. *Southern Medical Journal*. 2017;110(8):516-22.
21. United Nations Office for the Coordination of Humanitarian Affairs (UNOCHA). *Humanitarian Bulletin Yemen/ Health system on the verge of collapse*2015. Available from: <http://reliefweb.int/report/yemen/yemen-humanitarian-bulletin-issue-6-issued-30-november-2015-enar>.
22. Qirbi N, Ismail SA. Health system functionality in a low-income country in the midst of conflict: the case of Yemen. *Health Policy and Planning*. 2017;32(6):911-22.
23. United Nations - Headquarters. *Sendai Framework for Disaster Risk Reduction 2015-2030*. 2015. Available from: <https://www.unisdr.org/we/inform/publications/43291>.
24. Loke AY, Fung WM, Liu X. Mainland China nurses' willingness to report to work in a disaster. *American Journal of Disaster Medicine*. 2013;8(4):273-82. Doi: 10.5055/ajdm.2013.0134.

- 1  
2  
3 25. Al Khalaileh MA, Bond E, Alasad JA. Jordanian nurses' perceptions of their  
4 preparedness for disaster management. *International emergency nursing*.  
5 2012;20(1):14-23.  
6  
7  
8  
9 26. Chokshi NK, Behar S, Nager AL, Dorey F, Upperman JS. Disaster management  
10 among pediatric surgeons: preparedness, training and involvement. *American*  
11 *Journal of Disaster Medicine*. 2008;3(1):5-14.  
12  
13  
14 27. Alzahrani F, Yiannis K. Emergency nurse disaster preparedness during mass  
15 gatherings: a cross-sectional survey of emergency nurses' perceptions in hospitals in  
16 Mecca, Saudi Arabia. *BMJ Open*. 2017;7(4):e013563.  
17  
18  
19 28. Ogedegbe C, Nyirenda T, Delmoro G, Yamin E, Feldman J. Health care workers  
20 and disaster preparedness: barriers to and facilitators of willingness to respond.  
21 *International Journal of Emergency Medicine*. 2012;5(1):29.  
22  
23  
24 29. Stergachis A, Garberson L, Lien O, D'Ambrosio L, Sangare L, Dold C. Health care  
25 workers' ability and willingness to report to work during public health emergencies.  
26 *Disaster Medicine and Public Health Preparedness*. 2011;5(4):300-8.  
27  
28  
29  
30  
31  
32  
33  
34  
35  
36  
37  
38  
39  
40  
41  
42  
43  
44  
45  
46  
47  
48  
49  
50  
51  
52  
53  
54  
55  
56  
57  
58  
59  
60

**Table 1: Descriptive statistics and inter-term correlation for items in self-efficacy**

| Items                                 | Descriptive statistics |       | Inter-item correlation |        |        |        |
|---------------------------------------|------------------------|-------|------------------------|--------|--------|--------|
|                                       | Mean                   | SD    | item 1                 | item 2 | item 3 | item 4 |
| Item 1: Ability to perform work       | 3.36                   | 1.074 | 1.000                  | 0.592  | 0.267  | 0.259  |
| Item 2: Familiarity with their role   | 3.62                   | 1.085 | 0.592                  | 1.000  | 0.325  | 0.324  |
| Item 3: Responsibility to participate | 4.23                   | 0.929 | 0.267                  | 0.325  | 1.000  | 0.390  |
| Item 4: Ability report to work        | 4.03                   | 1.062 | 0.259                  | 0.324  | 0.390  | 1.000  |

For peer review only

**Table 2: Socio-demographic, professional, interpersonal, and willingness Characteristics of Respondents**

| Variable                                             |                                      | Frequency (n= 692) | Percentage (%) |
|------------------------------------------------------|--------------------------------------|--------------------|----------------|
| Age (years)                                          | ≤30                                  | 360                | 52.0           |
|                                                      | 31-45                                | 294                | 42.5           |
|                                                      | ≥46                                  | 38                 | 5.5            |
| Gender                                               | Male                                 | 419                | 60.5           |
|                                                      | Female                               | 273                | 39.5           |
| Marital-status                                       | Single                               | 258                | 37.3           |
|                                                      | Married                              | 420                | 60.7           |
|                                                      | Divorce                              | 8                  | 1.2            |
|                                                      | Widow                                | 6                  | 0.9            |
| Education-level                                      | Diploma                              | 280                | 40.5           |
|                                                      | Bachelor                             | 275                | 39.7           |
|                                                      | Post graduate education              | 137                | 19.8           |
|                                                      | Master                               | 104                | 15.0           |
| Professional                                         | 33                                   | 4.8                |                |
| Profession type                                      | Doctors                              | 311                | 44.9           |
|                                                      | Specialist medical practitioner      | 126                | 8.2            |
|                                                      | General medical practitioner         | 185                | 26.7           |
|                                                      | Nurses                               | 381                | 55.1           |
| Work duration (years)                                | ≤5                                   | 360                | 52             |
|                                                      | 6-10                                 | 213                | 30.8           |
|                                                      | 11-15                                | 76                 | 11.0           |
|                                                      | ≥16                                  | 43                 | 6.2            |
| Dependent                                            | With dependent                       | 456                | 65.9           |
|                                                      | Elder                                | 65                 | 9.4            |
|                                                      | Child                                | 276                | 39.9           |
|                                                      | Both                                 | 115                | 16.6           |
|                                                      | No dependent                         | 236                | 34.1           |
| <sup>a</sup> Support                                 | No                                   | 119                | 26.1           |
|                                                      | Yes                                  | 337                | 73.9           |
| <sup>b</sup> Previous training                       | With previous training               | 271                | 39.2           |
|                                                      | Without previous training            | 421                | 60.8           |
| <sup>b</sup> Previous experience                     | With previous experience             | 248                | 35.8           |
|                                                      | Without previous training            | 444                | 64.2           |
| Trust in work safety in case of disaster             | High trust in work safety            | 563                | 81.4           |
|                                                      | Low trust in work safety             | 129                | 18.6           |
| Trust in family preparedness in case of a disaster   | High trust in family preparedness    | 544                | 78.6           |
|                                                      | Low trust in family preparedness     | 148                | 21.4           |
| Trust in colleague preparedness to react in disaster | High trust in colleague preparedness | 611                | 88.3           |
|                                                      | Low trust in colleague preparedness  | 81                 | 11.7           |

|                                                      |                                     |     |      |
|------------------------------------------------------|-------------------------------------|-----|------|
| Trust in hospital preparedness to react in disaster  | High trust in hospital preparedness | 522 | 75.4 |
|                                                      | Low trust in hospital preparedness  | 170 | 24.6 |
| Self-efficacy score (Median; Inter-Quartile)         |                                     | 16  | 5    |
| Willingness to participate in Any type of disaster   | High                                | 623 | 90.0 |
|                                                      | Low                                 | 69  | 10.0 |
| Willingness to participate in Natural disaster       | High                                | 535 | 77.3 |
|                                                      | Low                                 | 157 | 22.7 |
| Willingness to participate in Influenza and Pandemic | High                                | 457 | 66.0 |
|                                                      | Low                                 | 235 | 34.0 |

<sup>a</sup>Only for participants with dependants. The percentages are only within participants with dependents.

<sup>b</sup>Previous experience and training in disasters

**Table 3: Univariate association of crude socio-demographic, professional and interpersonal characteristics with willingness in any type of disaster, in natural disasters, or in influenza pandemic**

| Variable                               | Willingness to participate in any type of disasters | Willingness to participate in natural disasters | Willingness to participate in influenza pandemic |
|----------------------------------------|-----------------------------------------------------|-------------------------------------------------|--------------------------------------------------|
|                                        | Odds ratio<br>(95% C.I.)                            | Odds ratio<br>(95% C.I.)                        | Odds ratio<br>(95% C.I.)                         |
| <b>Age</b>                             |                                                     |                                                 |                                                  |
| ≤30                                    | 1                                                   | 1                                               | 1                                                |
| 31-45                                  | 1.056 (0.628-1.775)                                 | <b>1.639</b> (1.126-2.387)                      | 1.138 (0.822-1.576)                              |
| ≥46                                    | 0.733 (0.269-1.997)                                 | 1.967 (0.798-4.850)                             | 1.354 (0.650-2.820)                              |
| <b>Gender</b>                          |                                                     |                                                 |                                                  |
| Female                                 | 1                                                   | 1                                               | 1                                                |
| Male                                   | <b>2.161</b> (1.307-3.573)                          | <b>2.254</b> (1.571-3.234)                      | <b>1.505</b> (1.093-2.072)                       |
| <b>Marital status</b>                  |                                                     |                                                 |                                                  |
| Single                                 | 1                                                   | 1                                               | 1                                                |
| Married                                | 0.899 (0.532-1.521)                                 | 1.128 (0.781-1.629)                             | 1.090 (0.787-1.510)                              |
| Divorce and widow                      | 0.615 (0.130-2.913)                                 | 1.160 (0.314-4.291)                             | 1.362 (0.416-4.466)                              |
| <b>Education Level</b>                 |                                                     |                                                 |                                                  |
| Up to Diploma                          | 1                                                   | 1                                               | 1                                                |
| Up to Bachelor                         | 1.380 (0.775-2.458)                                 | <b>1.962</b> (1.317-2.922)                      | 1.221 (0.858-1.738)                              |
| Up to Postgraduate                     | 0.847 (0.450-1.596)                                 | <b>2.279</b> (1.351-3.842)                      | 0.998 (0.651-1.528)                              |
| <b>Profession type</b>                 |                                                     |                                                 |                                                  |
| Nurses                                 | 1                                                   | 1                                               | 1                                                |
| General medical practitioner           | 1.473 (0.781-2.776)                                 | <b>1.554</b> (1.013-2.384)                      | 0.756 (0.524-1.091)                              |
| Specialist medical practitioner        | 0.965 (0.507-1.835)                                 | <b>2.407</b> (1.377-4.208)                      | 0.942 (0.614-1.446)                              |
| <b>Work duration</b>                   |                                                     |                                                 |                                                  |
| ≤5                                     | 1                                                   | 1                                               | 1                                                |
| 6-10                                   | 1.006 (0.563-1.798)                                 | 1.079 (0.721-1.614)                             | 0.975 (0.683-1.392)                              |
| 11-15                                  | 1.028 (0.438-2.415)                                 | <b>2.337</b> (1.118-4.882)                      | 1.059 (0.626-1.791)                              |
| ≥16                                    | 0.456 (0.196-1.063)                                 | 0.650 (0.329-1.286)                             | 1.198 (0.603-2.379)                              |
| <b>Presence of dependent</b>           |                                                     |                                                 |                                                  |
| No dependent                           | 1                                                   | 1                                               | 1                                                |
| Dependent with no support              | 0.673 (0.346-1.308)                                 | 1.149 (0.683-1.933)                             | <b>1.617</b> (1.000-2.612)                       |
| Dependent with support                 | 1.253 (0.707-2.222)                                 | 1.305 (0.880-1.935)                             | 1.283 (0.907-1.815)                              |
| <b><sup>a</sup>Previous training</b>   |                                                     |                                                 |                                                  |
| No                                     | 1                                                   | 1                                               | 1                                                |
| Yes                                    | 1.653 (0.959-2.849)                                 | 1.090 (0.756-1.573)                             | 1.147 (0.829-1.585)                              |
| <b><sup>a</sup>Previous experience</b> |                                                     |                                                 |                                                  |
| No                                     | 1                                                   | 1                                               | 1                                                |
| Yes                                    | 1.216 (0.714-2.070)                                 | 0.974 (0.673-1.411)                             | <b>1.857</b> (1.317-2.619)                       |
| <b>Trust in work safety</b>            |                                                     |                                                 |                                                  |



|                                          |                            |                            |                            |
|------------------------------------------|----------------------------|----------------------------|----------------------------|
| Low                                      | 1                          | 1                          | 1                          |
| High                                     | <b>3.284</b> (1.937-5.567) | 1.280 (0.825-1.987)        | 1.192 (0.800-1.774)        |
| <b>Trust in family preparedness</b>      |                            |                            |                            |
| Low                                      | 1                          | 1                          | 1                          |
| High                                     | 1.338 (0.756-2.369)        | 1.292 (0.850-1.963)        | 0.990 (.0674-1.454)        |
| <b>Trust in colleague's preparedness</b> |                            |                            |                            |
| Low                                      | 1                          | 1                          | 1                          |
| High                                     | <b>2.592</b> (1.401-4.795) | <b>1.974</b> (1.200-3.246) | 1.392 (0.866-2.237)        |
| <b>Trust in hospital preparedness</b>    |                            |                            |                            |
| Low                                      | 1                          | 1                          | 1                          |
| High                                     | 1.392 (0.807-2.400)        | 1.212 (0.810-1.814)        | 1.158 (0.807-1.663)        |
| <b><sup>b</sup>Self-efficacy</b>         | <b>1.358</b> (1.247-1.479) | <b>1.184</b> (1.115-1.257) | <b>1.135</b> (1.076-1.197) |

<sup>a</sup>Previous experience and training in disasters

<sup>b</sup>*Continuous measure, with one unit increase in self-efficacy*

**Table 4: Multivariate association of adjusted professional and interpersonal characteristics with willingness in any type of disaster, in natural disasters, or in influenza pandemic**

| Variable                                 | Willingness to participate in any type of disasters | Willingness to participate in natural disasters | Willingness to participate in influenza pandemic |
|------------------------------------------|-----------------------------------------------------|-------------------------------------------------|--------------------------------------------------|
|                                          | Odds ratio (95% C.I.)                               | Odds ratio (95% C.I.)                           | Odds ratio (95% C.I.)                            |
| <b>Age</b>                               |                                                     |                                                 |                                                  |
| ≤30                                      | 1                                                   | 1                                               | 1                                                |
| 31-45                                    | 1.137 (0.609-2.121)                                 | 1.432 (0.928-2.209)                             | 1.008 (0.695-1.461)                              |
| ≥46                                      | 0.440 (0.136-1.418)                                 | 1.087 (0.409-2.886)                             | 1.062 (0.484-2.332)                              |
| <b>Gender</b>                            |                                                     |                                                 |                                                  |
| Female                                   | 1                                                   | 1                                               | 1                                                |
| Male                                     | 1.456 (0.807-2.628)                                 | <b>1.639</b> (1.102-2.439)                      | 1.131 (0.793-1.612)                              |
| <b>Education Level</b>                   |                                                     |                                                 |                                                  |
| Up to Diploma                            | -                                                   | 1                                               | -                                                |
| Up to Bachelor                           | -                                                   | 1.706 (0.993-2.932)                             | -                                                |
| Up to Postgraduate                       | -                                                   | 1.177 (0.522-2.657)                             | -                                                |
| <b>Profession type</b>                   |                                                     |                                                 |                                                  |
| Nurses                                   | 1                                                   | 1                                               | 1                                                |
| General medical practitioner             | 1.285 (0.438-3.767)                                 | 1.581 (0.691-3.614)                             | 0.751 (0.468-1.205)                              |
| Specialist medical practitioner          | 1.392 (0.578-3.352)                                 | 0.939 (0.515-1.713)                             | 0.697 (0.473-1.026)                              |
| <b>Presence of dependent</b>             |                                                     |                                                 |                                                  |
| No dependent                             | -                                                   | -                                               | 1                                                |
| Dependent with no support                | -                                                   | -                                               | 1.537 (0.910-2.598)                              |
| Dependent with support                   | -                                                   | -                                               | 1.154 (0.791-1.685)                              |
| <b><sup>a</sup>Previous experience</b>   |                                                     |                                                 |                                                  |
| No                                       | -                                                   | -                                               | 1                                                |
| Yes                                      | -                                                   | -                                               | <b>1.528</b> (1.058-2.207)                       |
| <b>Trust in work safety</b>              |                                                     |                                                 |                                                  |
| Low                                      | 1                                                   | -                                               | -                                                |
| High                                     | <b>2.535</b> (1.357-4.736)                          | -                                               | -                                                |
| <b>Trust in colleague's preparedness</b> |                                                     |                                                 |                                                  |
| Low                                      | 1                                                   | 1                                               | -                                                |
| High                                     | 1.199 (0.576-2.496)                                 | 1.363 (0.791-2.351)                             | -                                                |
| <b><sup>b</sup>Self-efficacy</b>         |                                                     |                                                 |                                                  |
|                                          | <b>1.319</b> (1.197-1.453)                          | <b>1.143</b> (1.069-1.221)                      | <b>1.114</b> (1.050-1.182)                       |

<sup>a</sup>Previous experience and training in disasters

<sup>b</sup>Continuous measure, with one unit increase in self-efficacy

# Reporting checklist for cross sectional study.

Based on the STROBE cross sectional guidelines.

## Instructions to authors

Complete this checklist by entering the page numbers from your manuscript where readers will find each of the items listed below.

Your article may not currently address all the items on the checklist. Please modify your text to include the missing information. If you are certain that an item does not apply, please write "n/a" and provide a short explanation.

Upload your completed checklist as an extra file when you submit to a journal.

In your methods section, say that you used the STROBE cross sectional reporting guidelines, and cite them as:

von Elm E, Altman DG, Egger M, Pocock SJ, Gotsche PC, Vandembroucke JP. The Strengthening the Reporting of Observational Studies in Epidemiology (STROBE) Statement: guidelines for reporting observational studies.

|              |                     | Reporting Item                                                                                  | Page Number       |
|--------------|---------------------|-------------------------------------------------------------------------------------------------|-------------------|
| Title        | <a href="#">#1a</a> | Indicate the study's design with a commonly used term in the title or the abstract              | Main document (I) |
| Abstract     | <a href="#">#1b</a> | Provide in the abstract an informative and balanced summary of what was done and what was found | Main document (1) |
| Background / | <a href="#">#2</a>  | Explain the scientific background and rationale for the                                         | Main document     |

|    |                      |                     |                                                            |               |
|----|----------------------|---------------------|------------------------------------------------------------|---------------|
| 1  | rationale            |                     | investigation being reported                               | (3)           |
| 2  |                      |                     |                                                            |               |
| 3  |                      |                     |                                                            |               |
| 4  | Objectives           | <a href="#">#3</a>  | State specific objectives, including any prespecified      | Main document |
| 5  |                      |                     | hypotheses                                                 | (4)           |
| 6  |                      |                     |                                                            |               |
| 7  |                      |                     |                                                            |               |
| 8  |                      |                     |                                                            |               |
| 9  | Study design         | <a href="#">#4</a>  | Present key elements of study design early in the paper    | Main document |
| 10 |                      |                     |                                                            | (4)           |
| 11 |                      |                     |                                                            |               |
| 12 |                      |                     |                                                            |               |
| 13 |                      |                     |                                                            |               |
| 14 | Setting              | <a href="#">#5</a>  | Describe the setting, locations, and relevant dates,       | Main document |
| 15 |                      |                     | including periods of recruitment, exposure, follow-up,     | (4-6)         |
| 16 |                      |                     | and data collection                                        |               |
| 17 |                      |                     |                                                            |               |
| 18 |                      |                     |                                                            |               |
| 19 |                      |                     |                                                            |               |
| 20 |                      |                     |                                                            |               |
| 21 |                      |                     |                                                            |               |
| 22 | Eligibility criteria | <a href="#">#6a</a> | Give the eligibility criteria, and the sources and methods | Main document |
| 23 |                      |                     | of selection of participants.                              | (4)           |
| 24 |                      |                     |                                                            |               |
| 25 |                      |                     |                                                            |               |
| 26 |                      |                     |                                                            |               |
| 27 |                      | <a href="#">#7</a>  | Clearly define all outcomes, exposures, predictors,        | Main document |
| 28 |                      |                     | potential confounders, and effect modifiers. Give          | (5), table1   |
| 29 |                      |                     | diagnostic criteria, if applicable                         | (Page 18)     |
| 30 |                      |                     |                                                            |               |
| 31 |                      |                     |                                                            |               |
| 32 |                      |                     |                                                            |               |
| 33 |                      |                     |                                                            |               |
| 34 |                      |                     |                                                            |               |
| 35 | Data sources /       | <a href="#">#8</a>  | For each variable of interest give sources of data and     | Main document |
| 36 | measurement          |                     | details of methods of assessment (measurement).            | (5)           |
| 37 |                      |                     | Describe comparability of assessment methods if there      |               |
| 38 |                      |                     | is more than one group. Give information separately for    |               |
| 39 |                      |                     | exposed and unexposed groups if applicable.                |               |
| 40 |                      |                     |                                                            |               |
| 41 |                      |                     |                                                            |               |
| 42 |                      |                     |                                                            |               |
| 43 |                      |                     |                                                            |               |
| 44 |                      |                     |                                                            |               |
| 45 |                      |                     |                                                            |               |
| 46 |                      |                     |                                                            |               |
| 47 | Bias                 | <a href="#">#9</a>  | Describe any efforts to address potential sources of bias  | Main document |
| 48 |                      |                     |                                                            | (13)          |
| 49 |                      |                     |                                                            |               |
| 50 |                      |                     |                                                            |               |
| 51 |                      |                     |                                                            |               |
| 52 | Study size           | <a href="#">#10</a> | Explain how the study size was arrived at                  | Main document |
| 53 |                      |                     |                                                            | (4,5)         |
| 54 |                      |                     |                                                            |               |
| 55 |                      |                     |                                                            |               |
| 56 |                      |                     |                                                            |               |
| 57 |                      |                     |                                                            |               |
| 58 | Quantitative         | <a href="#">#11</a> | Explain how quantitative variables were handled in the     | Main document |
| 59 |                      |                     |                                                            |               |
| 60 |                      |                     |                                                            |               |

|    |                  |                                                                                |                |
|----|------------------|--------------------------------------------------------------------------------|----------------|
| 1  | variables        | analyses. If applicable, describe which groupings were                         | (6)            |
| 2  |                  |                                                                                |                |
| 3  |                  | chosen, and why                                                                |                |
| 4  |                  |                                                                                |                |
| 5  |                  |                                                                                |                |
| 6  | Statistical      | <a href="#">#12a</a> Describe all statistical methods, including those used to | Main document  |
| 7  |                  |                                                                                |                |
| 8  | methods          | control for confounding                                                        | (6)            |
| 9  |                  |                                                                                |                |
| 10 |                  |                                                                                |                |
| 11 |                  | <a href="#">#12b</a> Describe any methods used to examine subgroups and        | Main document  |
| 12 |                  |                                                                                |                |
| 13 |                  | interactions                                                                   | (6)            |
| 14 |                  |                                                                                |                |
| 15 |                  |                                                                                |                |
| 16 |                  | <a href="#">#12c</a> Explain how missing data were addressed                   | Main document  |
| 17 |                  |                                                                                |                |
| 18 |                  |                                                                                | (6)            |
| 19 |                  |                                                                                |                |
| 20 |                  |                                                                                |                |
| 21 |                  |                                                                                |                |
| 22 |                  | <a href="#">#12d</a> If applicable, describe analytical methods taking account | Main document  |
| 23 |                  |                                                                                |                |
| 24 |                  | of sampling strategy                                                           | (4, 6)         |
| 25 |                  |                                                                                |                |
| 26 |                  |                                                                                |                |
| 27 |                  | <a href="#">#12e</a> Describe any sensitivity analyses                         |                |
| 28 |                  |                                                                                |                |
| 29 |                  |                                                                                |                |
| 30 | Participants     | <a href="#">#13a</a> Report numbers of individuals at each stage of study—     | Main document  |
| 31 |                  |                                                                                |                |
| 32 |                  | eg numbers potentially eligible, examined for eligibility,                     | (4, 6)         |
| 33 |                  |                                                                                |                |
| 34 |                  | confirmed eligible, included in the study, completing                          |                |
| 35 |                  |                                                                                |                |
| 36 |                  | follow-up, and analysed. Give information separately for                       |                |
| 37 |                  |                                                                                |                |
| 38 |                  | for exposed and unexposed groups if applicable.                                |                |
| 39 |                  |                                                                                |                |
| 40 |                  |                                                                                |                |
| 41 |                  |                                                                                |                |
| 42 |                  | <a href="#">#13b</a> Give reasons for non-participation at each stage          | Main document  |
| 43 |                  |                                                                                |                |
| 44 |                  |                                                                                |                |
| 45 |                  |                                                                                | (4, 6, 13)     |
| 46 |                  |                                                                                |                |
| 47 |                  |                                                                                |                |
| 48 |                  | <a href="#">#13c</a> Consider use of a flow diagram                            |                |
| 49 |                  |                                                                                |                |
| 50 |                  |                                                                                |                |
| 51 | Descriptive data | <a href="#">#14a</a> Give characteristics of study participants (eg            | Main document  |
| 52 |                  |                                                                                |                |
| 53 |                  | demographic, clinical, social) and information on                              | (7,8), table 2 |
| 54 |                  |                                                                                |                |
| 55 |                  | exposures and potential confounders. Give information                          | (page 19, 20)  |
| 56 |                  |                                                                                |                |
| 57 |                  | separately for exposed and unexposed groups if                                 |                |
| 58 |                  |                                                                                |                |
| 59 |                  |                                                                                |                |
| 60 |                  |                                                                                |                |

applicable.

|    |                |                      |                                                              |
|----|----------------|----------------------|--------------------------------------------------------------|
| 1  |                |                      |                                                              |
| 2  |                |                      |                                                              |
| 3  |                |                      |                                                              |
| 4  |                | <a href="#">#14b</a> | Indicate number of participants with missing data for        |
| 5  |                |                      | each variable of interest                                    |
| 6  |                |                      | Table 2 (page                                                |
| 7  |                |                      | 19, 20)                                                      |
| 8  |                |                      |                                                              |
| 9  | Outcome data   | <a href="#">#15</a>  | Report numbers of outcome events or summary                  |
| 10 |                |                      | Measures. Give information separately for exposed and        |
| 11 |                |                      | unexposed groups if applicable.                              |
| 12 |                |                      | Main document                                                |
| 13 |                |                      | (7), table 2                                                 |
| 14 |                |                      | (page 19, 20)                                                |
| 15 |                |                      |                                                              |
| 16 | Main results   | <a href="#">#16a</a> | Give unadjusted estimates and, if applicable,                |
| 17 |                |                      | confounder-adjusted estimates and their precision (eg,       |
| 18 |                |                      | 95% confidence interval). Make clear which confounders       |
| 19 |                |                      | were adjusted for and why they were included                 |
| 20 |                |                      | Main document                                                |
| 21 |                |                      | (8, 9), table 3,                                             |
| 22 |                |                      | 4 (page 21-23)                                               |
| 23 |                |                      |                                                              |
| 24 |                |                      |                                                              |
| 25 |                |                      |                                                              |
| 26 |                | <a href="#">#16b</a> | Report category boundaries when continuous variables         |
| 27 |                |                      | were categorized                                             |
| 28 |                |                      | Main document                                                |
| 29 |                |                      | 5                                                            |
| 30 |                |                      |                                                              |
| 31 |                |                      |                                                              |
| 32 |                | <a href="#">#16c</a> | If relevant, consider translating estimates of relative risk |
| 33 |                |                      | into absolute risk for a meaningful time period              |
| 34 |                |                      |                                                              |
| 35 |                |                      |                                                              |
| 36 |                |                      |                                                              |
| 37 | Other analyses | <a href="#">#17</a>  | Report other analyses done—e.g., analyses of                 |
| 38 |                |                      | subgroups and interactions, and sensitivity analyses         |
| 39 |                |                      |                                                              |
| 40 |                |                      |                                                              |
| 41 |                |                      |                                                              |
| 42 | Key results    | <a href="#">#18</a>  | Summarise key results with reference to study objectives     |
| 43 |                |                      | Main document                                                |
| 44 |                |                      | (6-9)                                                        |
| 45 |                |                      |                                                              |
| 46 |                |                      |                                                              |
| 47 |                |                      |                                                              |
| 48 | Limitations    | <a href="#">#19</a>  | Discuss limitations of the study, taking into account        |
| 49 |                |                      | sources of potential bias or imprecision. Discuss both       |
| 50 |                |                      | direction and magnitude of any potential bias.               |
| 51 |                |                      | Main document                                                |
| 52 |                |                      | (12, 13)                                                     |
| 53 |                |                      |                                                              |
| 54 |                |                      |                                                              |
| 55 | Interpretation | <a href="#">#20</a>  | Give a cautious overall interpretation considering           |
| 56 |                |                      | objectives, limitations, multiplicity of analyses, results   |
| 57 |                |                      | Main document                                                |
| 58 |                |                      | (9-12)                                                       |
| 59 |                |                      |                                                              |
| 60 |                |                      |                                                              |

1 from similar studies, and other relevant evidence.

2  
3  
4 Generalisability [#21](#) Discuss the generalisability (external validity) of the Main document  
5 study results (13)  
6  
7

8  
9 Funding [#22](#) Give the source of funding and the role of the funders for Main document  
10 the present study and, if applicable, for the original study (14)  
11  
12 on which the present article is based  
13  
14  
15

16  
17 The STROBE checklist is distributed under the terms of the Creative Commons Attribution License  
18 CC-BY. This checklist can be completed online using <https://www.goodreports.org/>, a tool made by  
19 the [EQUATOR Network](#) in collaboration with [Penelope.ai](#)  
20  
21  
22  
23  
24  
25  
26  
27  
28  
29  
30  
31  
32  
33  
34  
35  
36  
37  
38  
39  
40  
41  
42  
43  
44  
45  
46  
47  
48  
49  
50  
51  
52  
53  
54  
55  
56  
57  
58  
59  
60

# BMJ Open

## Factors associated with Healthcare Workers Willingness to Participate in Disasters: a cross-sectional study in Sana'a, Yemen

|                                 |                                                                                                                                                                                            |
|---------------------------------|--------------------------------------------------------------------------------------------------------------------------------------------------------------------------------------------|
| Journal:                        | <i>BMJ Open</i>                                                                                                                                                                            |
| Manuscript ID                   | bmjopen-2019-030547.R1                                                                                                                                                                     |
| Article Type:                   | Original research                                                                                                                                                                          |
| Date Submitted by the Author:   | 02-Aug-2019                                                                                                                                                                                |
| Complete List of Authors:       | Al-Hunaishi, Weiam; University of Malaya, Department of Social and Preventive Medicine<br>Hoe, Victor; Universiti Malaya<br>Chinna, Karuthan ; Taylor's University, School of Medicine-SRI |
| <b>Primary Subject Heading</b>: | Public health                                                                                                                                                                              |
| Secondary Subject Heading:      | Global health, Health services research, Public health                                                                                                                                     |
| Keywords:                       | Disaster preparedness, willingness, self-efficacy, healthcare worker, intrapersonal                                                                                                        |
|                                 |                                                                                                                                                                                            |

SCHOLARONE™  
Manuscripts



1  
2  
3  
4  
5 **Factors associated with Healthcare Workers Willingness to Participate in Disasters: a**  
6  
7 **cross-sectional study in Sana'a, Yemen**  
8  
9

10 **Authors' names, credentials/degrees, email addresses and institutional affiliations:**  
11

- 12  
13 1. **MPH. MD. Weiam Al-Hunaishi (WA):** Department of Social & Preventive Medicine,  
14 Faculty of Medicine, University of Malaya, Kuala Lumpur, Malaysia. (e-mail:  
15 waam59@hotmail.com)  
16  
17  
18  
19 2. **Prof. Dr. Victor CW Hoe (VCWH):** Centre for Occupational and Environmental Health,  
20 Department of Social & Preventive Medicine, Faculty of Medicine, University of Malaya,  
21 Kuala Lumpur, Malaysia. (e-mail: victor@ummc.edu.my)  
22  
23  
24  
25 3. **Associate Prof. Dr. Karuthan Chinna (KC):** School of Medicine-SRI, Faculty of Health &  
26 Medical Sciences, Taylor's University, Malaysia. (e-mail: karuthan.chinna@taylors.edu.my)  
27  
28  
29  
30

31 **Correspondence and reprint requests:** to Weiam Al-Hunaishi (e-mail: [Waam59@hotmail.com](mailto:Waam59@hotmail.com),  
32 telephone number: +60173479802, mail address: Department of Social and Preventive Medicine  
33 Faculty of Medicine, University of Malaya, 50603 Kuala Lumpur, Malaysia).  
34  
35  
36  
37

38 **Contributorship statement:**  
39

- 40  
41 • WA – conceptualized the study, conducted the data collection, analysis, and interpretation of  
42 data for the work; draft and approve the manuscript for publication.  
43  
44  
45 • VCWH – conceptualized the study, interpretation of data for the work; revise and approve the  
46 manuscript for publication.  
47  
48  
49  
50 • KC – conceptualized the study, supervised the data analysis, interpretation of data for the  
51 work.  
52  
53  
54  
55  
56  
57  
58  
59  
60

1  
2  
3 **List of Abbreviations:**  
4  
5

|    |     |                     |
|----|-----|---------------------|
| 6  | CI  | Confidence Interval |
| 7  |     |                     |
| 8  | HCW | Healthcare workers  |
| 9  |     |                     |
| 10 | IQR | Interquartile range |
| 11 |     |                     |
| 12 | SD  | Standard Deviation  |
| 13 |     |                     |
| 14 |     |                     |
| 15 |     |                     |
| 16 |     |                     |
| 17 |     |                     |
| 18 |     |                     |
| 19 |     |                     |
| 20 |     |                     |
| 21 |     |                     |
| 22 |     |                     |
| 23 |     |                     |
| 24 |     |                     |
| 25 |     |                     |
| 26 |     |                     |
| 27 |     |                     |
| 28 |     |                     |
| 29 |     |                     |
| 30 |     |                     |
| 31 |     |                     |
| 32 |     |                     |
| 33 |     |                     |
| 34 |     |                     |
| 35 |     |                     |
| 36 |     |                     |
| 37 |     |                     |
| 38 |     |                     |
| 39 |     |                     |
| 40 |     |                     |
| 41 |     |                     |
| 42 |     |                     |
| 43 |     |                     |
| 44 |     |                     |
| 45 |     |                     |
| 46 |     |                     |
| 47 |     |                     |
| 48 |     |                     |
| 49 |     |                     |
| 50 |     |                     |
| 51 |     |                     |
| 52 |     |                     |
| 53 |     |                     |
| 54 |     |                     |
| 55 |     |                     |
| 56 |     |                     |
| 57 |     |                     |
| 58 |     |                     |
| 59 |     |                     |
| 60 |     |                     |

For peer review only

## Abstract

**Objectives:** Willingness to participate in disasters are usually overlooked and not addressed in disaster preparedness training courses to ensure health service coverage. This will lead to issue during the disaster. This study aims to assess healthcare workers (HCW) willingness to participate in biological and natural disasters, and to identify its associated factors.

**Design:** This is a cross-sectional study using a self-administered questionnaire. The questionnaire was distributed to 1093 HCW. The data was analysed using multiple logistic regression with significance level  $p < 0.05$ . Ethical clearance and consent of the participants were duly obtained.

**Setting:** In three public Hospitals that provide tertiary level healthcare in Sana'a City, Yemen.

**Participants:** Nurses and doctors (HCW).

**Results:** There were 692 (response rate 63.3%) completed the questionnaire, of which 55.1% were nurses and 44.9% were doctors. The study found that self-efficacy was associated with willingness to participate in disaster response for any type of disasters (Odds Ratio [OR]=1.328, 95% Confidence Interval [95%CI]: 1.206 to 1.464), natural disasters (OR=1.138, 95%CI: 1.064 to 1.217), and influenza pandemic (OR=1.112, 95%CI: 1.049 to 1.180). The results further show that willingness is associated with HCW being young, male and having higher educational qualifications.

**Conclusion:** Self-efficacy has been found to be an important factor associated with willingness. Improving self-efficacy through training in disaster preparedness may increase willingness of HCW to participate in a disaster.

**Key words:** Disaster preparedness; willingness; self-efficacy; intrapersonal; healthcare worker.

### Strength and limitations of this study

- This study is the first study that attempt to assess HCW willingness to participate in different types of disasters in Sana'a City, Yemen.
- Implementing a cross-sectional design and using a convenience sample has made it difficult to establish causal association.
- The study samples represents HCW in Sana'a City in term of gender and locality.
- The face to face approach, which included introduction of the study and its objectives, ensured a higher response rate and minimised the risk of selection bias.

## Introduction:

In various parts of the world, disasters destroy communities and infrastructures, causing huge material and human losses.<sup>1</sup> Similarly, hospitals and health centres are also affected by the disasters, which restrict its work of relieving disaster-stricken communities. By 2025, more than half of world population will live in cities, particularly in urban cities located along a seismic fault lines, flood and other natural disasters prone areas.<sup>2</sup> Therefore, healthcare worker (HCW) should be prepared to manage the influx of patient during possibly life threatening circumstances. Healthcare worker is defined as “the one who delivers care and services to the sick and ailing either directly as doctors and nurses or indirectly as aides, helpers, laboratory technicians, or even medical waste handlers”.<sup>3</sup>

According to the Global Facility for Disaster Reduction and Recovery (GFDRR), Yemen is one of the priority countries in the Middle East and North Africa region, mainly due to its vulnerability to disasters.<sup>4-6</sup> Natural disasters are recurrent in Yemen, which includes storms, landslides, earthquake and floods. Floods due to the monsoonal rainfall, is responsible for the majority of the mortality due to disaster.<sup>6</sup> Currently in Yemen, disaster management only mainly focuses on responding to post disasters damage, and there is a lack of disaster preparedness, such training and mock drills. The insufficient training makes it difficult to maintain preparedness.<sup>4,7,8</sup> A competent prepared healthcare worker could better mitigate and respond to the community health needs during crises, which in turn will elevate health outcomes.

During disasters, HCW are expected to provide health care assistance to people suffering from the disasters alongside with caring for their usual patients. Some are also required to care for their dependents. Most of the previous studies reported an anticipated decrease in health workforce during disaster as not all HCW are willing to participate in a

1  
2  
3 disaster. Therefore, understanding the factors associated with willingness to participate in a  
4  
5 disaster would allow more effective planning for disaster situation. Systematic reviews have  
6  
7 found that willingness was associated with factors like the nature and type of event;  
8  
9 competing obligations between personal and professional needs; the work environment and  
10  
11 climate including personal safety, and the relationship between knowledge and perceptions of  
12  
13 efficacy.<sup>9,10</sup>  
14  
15

16  
17 Disaster preparedness activities and routine disasters trainings has been found to  
18  
19 improve knowledge, skills and attitude preparedness of disaster.<sup>11</sup> However, the factors that  
20  
21 affect willingness to participate in disasters are beyond just having knowledge on disasters  
22  
23 management.<sup>9-12</sup>  
24  
25

26  
27 In a recent systematic review, they found only few studies that have been conducted  
28  
29 in the Middle East on willingness to participate in disasters. They recommend that further  
30  
31 research should be conducted based on behavioural theories to better understand the Middle  
32  
33 East context of willingness to participate in a disaster.<sup>13</sup> In another systematic review of 70  
34  
35 studies on HCW willingness to participate in disasters, only 12 studies were form Asia and  
36  
37 none of those studies was from the Middle East.<sup>11</sup> Therefore, the objective of this study is to  
38  
39 determine the associations between socio-demographic, professional, and intrapersonal  
40  
41 factors associated with doctors' and nurses' willingness to participate in disasters in response  
42  
43 in Sana'a, Yemen. The study factors was built based on the self-efficacy behavioural theory.  
44  
45  
46  
47

## 48 **Methods:**

### 49 **Study design, population and instrument**

50  
51 This is a cross-sectional study conducted in three public hospitals in the Sana'a  
52  
53 Governorate, Yemen; Al-Thora, Al-Jumhuri, and Al-Kuwait hospitals, which have more  
54  
55 than a total of 4,000 nurses and doctors, which was the focus of this study. Out of this, 1093  
56  
57  
58  
59  
60

1  
2  
3 HCW were selected through convenient sampling by approaching the healthcare workers  
4  
5 individually. The sample size calculation was based on a 95% confidence interval with a  
6  
7 power of set to 80%. The sample size of 1093 was determined based on the variable  
8  
9 “perception of responsibility to participate” from a pre-study, which is an element of the self-  
10  
11 efficacy construct with the highest sample size to achieve an association.<sup>14</sup> The determined  
12  
13 sample size was 614, which was inflated by 78 percent based on the lowest response rate of  
14  
15 previous studies to reach 1093.<sup>15</sup>  
16  
17  
18  
19

20 The questionnaire was developed by the researcher based on information from  
21  
22 previous studies and opinion of national and international experts (supplementary materials).<sup>15-</sup>  
23  
24 <sup>18</sup> The questionnaire was pre tested for validity and reliability. The questionnaire was  
25  
26 distributed to national and international expert together with a questions on the validity of the  
27  
28 questionnaire with a scale of 1 to 4 (1 not relevant to 4 highly relevant). It tested the  
29  
30 questionnaire consistency, relatedness, representativeness and clarity of wording. As a result,  
31  
32 six items of the questionnaire, which was related to the knowledge construct, was deleted and  
33  
34 changes on the questions was reworded. These questions have undergone forward and  
35  
36 backward-translation form English to Arabic then from Arabic to English. Then the  
37  
38 researcher used a face to face meeting with three HCW, where the study objective was  
39  
40 explained, then the participants were asked to give their comments on what they think of the  
41  
42 questions.  
43  
44  
45  
46  
47

48 The questionnaire was pilot tested on 20 doctors and nurses from a hospital, other  
49  
50 than hospitals that have been chosen for the study. The internal consistency was assessed  
51  
52 using Cronbach’s alpha. Self- efficacy was 0.801, which considered good inter-correlation.  
53  
54 Therefore, the self-efficacy four items were used in the final survey to build the construct as  
55  
56 one of the intrapersonal factors. The pilot study have not published yet. The questionnaire  
57  
58 consists of socio-demographic, professional, and intrapersonal factors, and willingness to  
59  
60

1  
2  
3 participate in a disaster. The professional, intrapersonal and willingness questions was  
4 measured on a five-point Likert scale (1=strongly disagree, 2=disagree, 3=somewhat agree,  
5 4=agree, and 5=strongly agree). A binary variable was created based on “less or equal two”  
6 as low and” more than 2” as high.  
7  
8  
9  
10  
11

### 12 **Self-efficacy theory**

13  
14  
15 Self-efficacy theory was chosen to build the self-efficacy construct as it illustrates  
16 beliefs that drive actions to face and solve problems faced to achieve intended goals. In case  
17 of disaster, the theory could be applied to HCW who are coping with fear and threat and  
18 adapting new behaviours because of their beliefs in their competences. This belief is derived  
19 from their successful performances, observing colleagues and managers positive behaviour,  
20 convincing by a superior person, and calming the physiological and emotional pressure  
21 caused by the threat.<sup>19</sup>  
22  
23  
24  
25  
26  
27  
28  
29  
30  
31  
32  
33  
34

### 35 **Data collection**

36  
37 Ethical approval was obtained from the Ministry of Health and Population of Yemen.  
38 Informed consent was obtained from the respondent and confidentiality of personal  
39 disclosures was re-assured. The self-administered questionnaires were distributed and  
40 retrieved between February and March 2018. A final 767 questionnaires were returned for  
41 analyses; 75 questionnaires were omitted due to missing values.  
42  
43  
44  
45  
46  
47  
48  
49  
50  
51

### 52 **Statistical analysis**

53  
54  
55 The data was analysed using Statistical Package for Social Science (SPSS) version 22.  
56 Descriptive outputs were generated describing the median, interquartile range, frequency  
57 counts and percentages. Chi square test and multiple logistic regression was performed to test  
58  
59  
60



1  
2  
3 the hypothesis of the study on  $p < 0.05$  for all statistical tests. The variables selected to be  
4 included in the multivariate analysis were variables with  $p < 0.25$  in the univariate analysis,  
5  
6 and gender, age, and type of profession were also included.  
7  
8  
9  
10  
11  
12

### 13 **Patient and Public Involvement**

14  
15  
16 Patients and the general public were not involved in the conduct of this research.  
17  
18 HCW were involved during the pilot study in order to test the understanding of the written  
19  
20 questionnaire. In addition, the data was assessable by the researchers and is stored in a secure  
21  
22 file in the computer and online storage.  
23  
24  
25  
26  
27  
28

### 29 **Results:**

#### 30 **Socio-demographics Characteristics**

31  
32  
33 Responses were collected from 692 HCW (response rate 63.3%), where 311 (44.9%)  
34  
35 were doctors and 381 (55.1%) were nurses. Most of the female participants were nurses  
36  
37 64.5%. More doctors (56.6%) had  $>5$  years of experience at their current place of work, as  
38  
39 compare to nurses (40.9%). The average age of participants was 31.96 (Standard Deviation  
40  
41 [SD] 7.46) years across the two occupations. Out of the 65.9% who had dependents, i.e.,  
42  
43 having to take-care of child or elderly persons, 73.9% reported to have support to care for  
44  
45 their dependent in a case of disaster. The percentages were almost equally distributed  
46  
47  
48 between doctors and nurses.  
49  
50  
51  
52  
53  
54  
55  
56  
57  
58  
59  
60

## Professional and Intrapersonal Characteristics

Table 1 describes the socio-demographic, professional, intrapersonal, and willingness characteristics of respondents. Only 39.2% of the HCW had have any previous training in disaster. This was the same for previous work experience, where only 35.8% of the participants had previous work experience in a disaster situation.

The doctors and nurses reported a high trust in work safety, in family, in colleague's preparedness to react, and in hospital preparedness to react in case of a disaster, with trust in colleague's preparedness as the highest percentage (88.3%). Similarly, HCW had a high median score (16; IQR 2) in self-efficacy construct.

### Respondents' willingness

Ninety percent of the participants expressed high willingness to participate in any type of disasters. However, they were less willing to participate in natural disasters (77.3%) and influenza pandemic (66.0%) (Table 1).

[\[Table 1\]](#)

### Analysis of Self-efficacy's factors

There were four items in the self-efficacy construct. After the data collection, the inter-correlation value of self- efficacy was tested before running the main analysis. The descriptive statistics and inter-item correlation values of the self-efficacy are presented in Table 2.

[\[Table 2\]](#)

1  
2  
3 Based on Table 2, there was moderate level of agreement in all the four items. The  
4  
5 highest correlation for each item with at least one other item in the construct was between 0.3  
6  
7 and 0.9. In factor analysis, the Kaiser-Meyer-Olkin (KMO) value was 0.658 ( $p < 0.001$ ), KMO  
8  
9 value close to 1, so the variables are suitable for factor analysis. Therefore, a single factor  
10  
11 was formed from the four items computed and was saved as incentive to be used in further  
12  
13 analysis. Accordingly, to calculate the self- efficacy, four questions was asked. The sum  
14  
15 outcome of the four answers ranged from 4 to 20 (Median 16, Interquartile range [IQR] 5).  
16  
17  
18  
19  
20  
21

### 22 **Factors associated with willingness to participate in any type disaster**

23  
24  
25 There was an association between participants' gender and willingness to participate  
26  
27 in any type of disaster, with male being more willing compared to female (crude OR=2.161,  
28  
29 95%CI: 1.307 to 3.573) (Table 3). Those with high trust in work safety (crude OR=3.284,  
30  
31 95%CI: 1.937 to 5.567), trust in colleague's preparedness (crude OR=2.592, 95%CI: 1.401 to  
32  
33 4.795) and self-efficacy (crude OR=1.358; 95%CI: 1.247 to 1.479) were also found to be  
34  
35 more willing to participate in any type of disaster in the univariate analysis (Table 3).  
36  
37  
38

39 In the final model, having trust in work safety (adjusted OR=2.535, 95%CI: 1.357 to  
40  
41 4.736) and self-efficacy (adjusted OR=1.319, 95%CI: 1.197 to 1.453) were found to be  
42  
43 associated with general willingness with any type of disasters (Table 4).  
44  
45  
46  
47  
48

### 49 **Factors associated with willingness to participate in natural disaster**

50  
51  
52 In the univariate analysis, there was an association between some of the socio-  
53  
54 demographic characteristics (age, gender, education level, type of profession and work  
55  
56 duration) with willingness to participate in natural disasters. Participants with bachelor and  
57  
58 postgraduate degrees had a higher odd of willingness to participate in natural disaster  
59  
60

1  
2  
3 disasters compared to those with diploma education. Those in the age group of between 31  
4  
5 and 45 were found to be more willing when compared to participants who were  $\leq 30$  years  
6  
7 old. The main intrapersonal factors associated with willingness in natural disasters were  
8  
9 participants' trust in colleagues' preparedness in case of a natural disaster, and self-efficacy  
10  
11 (Table 3).  
12  
13  
14

15 In multivariate, being male (adjusted OR=1.639, 95%CI: 1.102 to 2.439) and self-  
16  
17 efficacy (adjusted OR=1.143, 95%CI: 1.069 to 1.221) were significantly associated with  
18  
19 willingness to participate in natural disasters (Table 4).  
20  
21  
22  
23  
24

### 25 **Factors associated with willingness to participate in influenza pandemic disaster**

26  
27  
28 For willingness to participate in influenza pandemic, the univariate results revealed  
29  
30 that being male, having a dependent with no support (compared to participants without  
31  
32 dependent), having previous experience and self-efficacy were associated with willingness to  
33  
34 participate in pandemic (Table 3).  
35  
36  
37

38 In the final model, having previous experience (adjusted OR=1.528, 95%CI: 1.058 to  
39  
40 2.207) and self-efficacy (adjusted OR=1.114, 95%CI: 1.050 to 1.182) were found to be  
41  
42 associated with willingness to participate in influenza pandemic (Table 4).  
43  
44

45 [[Table 3](#), [Table 4](#)]  
46  
47  
48  
49  
50  
51  
52  
53  
54  
55  
56  
57  
58  
59  
60

## Discussion:

This study contained a main question that is to test the strength and direction of association between the independent variables- socio-demographic, professional, and intrapersonal variables- with the variables of willingness to participate in three different types of disasters. The results showed that trust in work safety and self-efficacy were associated with disaster participation willingness after in the multivariate analysis. Gender and self-efficacy were found to be significantly associated with willingness to participate in natural disaster. While previous experience and self-efficacy were statistically significant with willingness of HCW to participate in influenza pandemic.

Having one hundred percent participation of HCW is difficult to obtain as much as it is vital in case of disasters. Previous studies suggested that between 65 and 97 percent of HCW were willing to participate in a natural disaster, and between 54 and 86 percent in an influenza pandemic.<sup>11,16,20,21</sup> The reason in this difference in the levels of willingness between the two types of disasters is due to the great distinction in their nature. The outcome of the interaction between HCW and the socio-environmental determinants of these disasters leads to having different willingness levels. According to Connor et al., the weighted risk resulting from this interaction plays a major role in HCW willingness.<sup>10</sup> In case of pandemics, the fear of the inability to control biohazards and watching colleagues inquiring a communicable disease after contact with affected persons was a suggested reason for the low willingness levels.<sup>10</sup> Another qualitative study in Australia highlighted that in different types of disasters emergency nurses' willingness to attend to work is shaped by the weighted risk to self and surrounding people and the pressure formed from the period dealing with the disaster.<sup>12</sup> Natural disasters may not directly affect HCW or their families like influenza pandemic

1  
2  
3 which may be a reason for the higher level of willingness to attend to work compared to  
4  
5  
6 pandemics.  
7

8  
9 The findings of this study are consistent with the previous studies regarding their  
10  
11 willingness level to different types of disasters. More HCW were willing to participate in  
12  
13 natural disaster (77.3%) as compared to influenza pandemic (66.0%). Even though, there  
14  
15 were a higher percentage of HCW willingness from this study to participate in both natural  
16  
17 disaster and influenza pandemic were higher compared to other studies, Yemen's high  
18  
19 vulnerability, due its topography and current economic, political and health status, could  
20  
21 affect the country health status and cause huge adverse health impacts in case of disasters.  
22  
23 According to the Vulnerability Matrix, one third of Yemen's districts are highly vulnerable.<sup>5</sup>  
24  
25

26  
27 In addition, due to the armed conflicts in Yemen that started in early 2015, it had  
28  
29 become difficult to deal with any disaster in case it occurred. According to the World Health  
30  
31 Organization (WHO), the healthcare system in Yemen is in a critical situation with about  
32  
33 50% of the health facilities in Yemen are either partially or total damage as a result of the  
34  
35 natural disasters and conflicts. Furthermore, of the 3,507 healthcare facilities in Yemen,  
36  
37 almost 300 healthcare facilities have been destroyed.<sup>5,22</sup> Therefore, any possible decrease in  
38  
39 the health work force during disasters in Yemen must be put in considerations during  
40  
41 response to disasters. The existed drained health sector is based on a vulnerable health system  
42  
43 in term of its structure and healthcare staff number and distribution in the country.<sup>23</sup> Thus,  
44  
45 training and preparing healthcare staff to act during disasters is critical and could help  
46  
47 achieving Priority 4 in the United Nations' Sendai Framework for Disaster Risk Reduction  
48  
49 2015-2030 in enhancing disaster preparedness for effective response and to "Build Back  
50  
51 Better" in recovery, rehabilitation and reconstruction of disasters, and prevent any possible  
52  
53 humanitarian catastrophe.<sup>24</sup>  
54  
55  
56  
57  
58  
59  
60

1  
2  
3 The results show that willingness to participate in events of natural disasters may be  
4 encouraged by many suggested factors. Factors such as respondents being male are  
5 accompanied with higher willingness to participate in natural disasters. The findings is  
6 similar to previous studies conducted in Jordan, China and United States of America.<sup>15,16,25,26</sup>  
7  
8 However, having less female health workers willing to participate in disasters highlight a  
9 need to address this group during health preparedness programs. This lack in female HCW  
10 willingness could be due to the gender and cultural barriers in Yemen. These barriers need to  
11 be addressed to better motivate females workers participation in case of disasters. This is  
12 important area for research as studies on willingness moving forward.  
13  
14

15  
16 As in previous studies, nurses and doctors with previous experience in influenza  
17 pandemic are more willing to participate in influenza pandemic.<sup>14, 25</sup> HCW which has  
18 experience with a previous disaster have better knowledge in disaster management, coping  
19 strategies, and ways to protect themselves and their families; which may be a reason for  
20 having higher odds of willingness. According to Alzahrani et al., Most of the nurses have a  
21 higher level in Mass gatherings management such as communicating effectively during  
22 emergencies in Saudi Arabia due to Previous experience, he also found a need for further  
23 trainings by the nurses.<sup>27</sup> Chokahi et al., found that simulation training, attending conferences  
24 and previous experience of increase paediatric surgeons feeling of preparedness.<sup>14</sup>  
25  
26

27  
28 This study found that trust in work safety during any type of disaster play key role in  
29 willingness to participate, which is similar to results from previous studies.<sup>11,25,28</sup> Work safety  
30 is important in order for HCW to feel safe and do their work, a study by Stergachis et al.,  
31 found that majority of the participants reported their fear or concern for self in case of  
32 influenza pandemic and during earthquake scenarios as one of the major barriers to  
33 willingness.<sup>29</sup> Considering work safety in disaster preparedness is especially important in  
34 Yemen after notifications made by Aldahrai et al., and Naser et al., on the current low work  
35  
36  
37  
38  
39  
40  
41  
42  
43  
44  
45  
46  
47  
48  
49  
50  
51  
52  
53  
54  
55  
56  
57  
58  
59  
60

1  
2  
3 place safety and the needs of increasing safety and security standards in hospitals in Yemen  
4  
5 Health establishments, regardless to external or internal catastrophes; unsafe work place  
6  
7 could lead to increase optional absenteeism during disaster.<sup>7,8</sup> Thus, putting information on  
8  
9 work safety and protection devices provided during several types of disasters is advisable.  
10  
11  
12

13 Many studies have established the association between self-efficacy and willingness  
14  
15 to participate in disasters in previous.<sup>10,15,16</sup> Similarly, this study have identified that self-  
16  
17 efficacy plays an important role in willingness to participate in natural disasters, in influenza  
18  
19 pandemic and any type of disasters. It indicates that elements tested for self-efficacy like  
20  
21 participants increase familiarity with their role, responsibility to react, and confidence of  
22  
23 ability to deal with various types of disasters could be a key factor to increase HCW self-  
24  
25 efficacy, thus, increase their willingness. Disaster preparedness trainings are encouraged to  
26  
27 contain materials that explain response to different type of disasters, doctors' and nurses' role  
28  
29 in disasters and how it makes a different in response to disasters. Supportive measures to  
30  
31 increase HCW self-efficacy such as immediate communication with needed information and  
32  
33 rewarding for efforts in disasters are suggested.  
34  
35  
36  
37  
38

39 Although the study has faced challenges in the sense of collecting the data during  
40  
41 political unrest in the country, the data was collected from three of the major public hospital.  
42  
43 The quality of data was insured by explaining the study and its objectives, and answering any  
44  
45 question that may arise. This prevented difference in understanding the questions and  
46  
47 increased participants' inclusion in the study. All and all the study suggested the vital value  
48  
49 of increasing self-efficacy and its element in order to obtain more willingness.  
50  
51  
52  
53  
54  
55  
56  
57  
58  
59  
60



## Strength and limitation

This is the first study explored the patterns and associated factors of the willingness status to participate in disasters among healthcare workers in Yemen. The response rate was also high as the questionnaire was distributed personally by the researcher. The questionnaire was pilot tested; this was to ensure that the validity of questionnaire.

This study had limitations, as the study was performed under a political insecurity/fragile state of the country a list of workers of HCW working at the hospitals was difficult to obtain. As a result, a universal sample was undertaken which could limit the study representativeness. This is a cross-sectional study using a self-administered questionnaire, where the actual willingness of the respondents cannot be ascertained. The respondents may answer positively due to social desirability bias. Other than the self-administrated questionnaire limitations, the study findings are limited to staff working at the tertiary level public hospitals in urban areas of Yemen.

## Conclusion:

Increased the likelihood of willingness to participate in disaster play a key role in guarantee optimum number of work force. This study indicates that one's socio-demographic, professional and intrapersonal factors plays a role in increase his/her willingness in general and across different type of disasters. Significant differences were revealed between participants' willingness in natural disasters by gender and self-efficacy, and participant's willingness in influenza pandemics by previous experience and self-efficacy. This result suggests integrating disaster management into an earlier education levels of doctors' and nurses' educational establishments. This could be achieved by adding early exposure of

1  
2  
3 healthcare workers to relevant disaster experience which would further boost their  
4  
5 willingness to participate in disaster response.  
6  
7

8           Other areas for preparedness may include increase hospitals safety and resilience;  
9  
10 hence that willingness to participate in natural disasters' response was influence by  
11  
12 demographic characteristic of the healthcare personnel, others found outside the bracket  
13  
14 should be motivated to participate with a reward package such as incentives and hazard  
15  
16 allowance. Further studies should be conducted in both urban and rural settings with  
17  
18 relatively peaceful atmosphere.  
19  
20  
21  
22  
23  
24

25 **Acknowledgement:** We thank Dr. Susan Connor, Dr. Karen Hammad and  
26  
27 Dr..Mohammed Khalil for their Support and advice during the study development, all  
28  
29 University Malaya academic staff, the team who collected the data, and all the participants  
30  
31 who contributed in this study.  
32  
33  
34

35 **Competing interests:** None declared  
36  
37

38 **Funding:** The authors have no financial disclosures to declare. This research did not  
39  
40 receive any specific grant from funding agencies in the public, commercial, or not-for-profit  
41  
42 sectors.  
43  
44  
45

46 **Data sharing statement:** No additional data are available.  
47  
48  
49  
50  
51  
52  
53  
54  
55  
56  
57  
58  
59  
60

**Reference:**

1. United Nations Economic and Social Commission for Asia and the Pacific. Disasters in Asia and the Pacific: 2015 year in review. United Nations report. Economic and social commission for Asia and the Pacific. 2015. [21 p.]. Available from: <https://www.unescap.org/resources/disasters-asia-and-pacific-2015-year-review>
2. Below R, Wirtz A, Guha-Sapir D. Disaster category classification and peril terminology for operational purposes. Centre for Research on the Epidemiology of Disasters. 2009. Available from: <https://www.cred.be/node/564>
3. Joseph, B., & Joseph, M. (2016). The health of the healthcare workers. Indian journal of occupational and environmental medicine, 20(2), 71–72. doi:10.4103/0019-5278.197518.
4. Ministry of Water and Environment. Yemen: National progress report on the implementation of the Hyogo Framework for Action (2013-2015). 2015. Available from: <http://preventionweb.net/go/40141>
5. World Health Organization. WHO annual report 2017: Yemen. Cairo: WHO Regional Office for the Eastern Mediterranean; 2018. Licence: CC BYNC-SA 3.0 IGO.
6. Banerjee, Aditi; Bhavnani, Rakhi; Burtonboy, Catherine H, et al. Natural Disasters in the Middle East and North Africa: A Regional Overview. The International Bank for Reconstruction and Development / The World Bank. [101 p.]. 2014; Report No.: 81658.
7. Aladhrai SA, Djalali A, Della Corte F, Alsabri M, El-Bakri NK, Ingrassia PL. Impact of the 2011 Revolution on Hospital Disaster Preparedness in Yemen. Disaster Medicine and Public Health Preparedness. 2015;9(4):396-402.
8. Naser WN, Ingrassia PL, Aladhrae S, Abdulraheem WA. A Study of Hospital Disaster Preparedness in South Yemen. Prehospital and Disaster Medicine. 2018;33(2):133.
9. Chaffee M. Willingness of health care personnel to work in a disaster: an integrative review of the literature. Disaster Medicine and Public Health Preparedness. 2009;3(1):42-56.

10. Connor SB. When and why health care personnel respond to a disaster: the state of the science. *Prehospital and Disaster Medicine*. 2014;29(3):270-4.
11. Gowing JR, Walker KN, Elmer SL, Cummings EA. Disaster Preparedness among Health Professionals and Support Staff: What is Effective? An Integrative Literature Review. *Prehospital and Disaster Medicine*. 2017;32(3):321-8.
12. Arbon P, Cusack L, Ranse J, Shaban RZ, Considine J, Kako M, et al. Exploring staff willingness to attend work during a disaster: a study of nurses employed in four Australian emergency departments. *Australasian Emergency Nursing Journal : AENJ*. 2013;16(3):103-9.
13. Ejeta LT, Ardalan A, Paton D. Application of Behavioral Theories to Disaster and Emergency Health Preparedness: A Systematic Review. *PLOS Currents Disasters*. 2015;7. Doi: 10.1371/currents.dis.31a8995ced321301466db400f1357829.
14. Chokshi NK, Behar S, Nager AL, Dorey F, Upperman JS. Disaster management among pediatric surgeons: preparedness, training and involvement. *American Journal of Disaster Medicine*. 2008;3(1):5-14.
15. Burke RV, Goodhue CJ, Chokshi NK, Upperman JS. Factors associated with willingness to respond to a disaster: a study of healthcare workers in a tertiary setting. *Prehospital and Disaster Medicine*. 2011;26(4):244-50.
16. Charney RL, Rebmann T, Flood RG. Hospital Employee Willingness to Work during Earthquakes Versus Pandemics. *Journal of Emergency Medicine*. 2015;49(5):665-74. Doi: <https://doi.org/10.1016/j.jemermed.2015.07.030>.
17. Balicer RD, Omer SB, Barnett DJ, Everly GS, Jr. Local public health workers' perceptions toward responding to an influenza pandemic. *BMC Public Health*. 2006;6:99.
18. Shapira S, Aharonson-Daniel L, Bar-Dayyan Y, Sykes D, Adini B. Knowledge, perceptions, attitudes and willingness to report to work in an earthquake: A pilot study comparing Canadian versus Israeli hospital nursing staff. *International Emergency Nursing*. 2016;25:7-12.
19. Bandura A. *Self-efficacy: The exercise of control*: Macmillan; 1997.
20. Arbon P, Ranse J, Cusack L, Considine J, Shaban RZ, Woodman RJ, et al. Australasian emergency nurses' willingness to attend work in a disaster: a survey. *Australasian Emergency Nursing Journal : AENJ*. 2013;16(2):52-7.

- 1  
2  
3 21. Brice JH, Gregg D, Sawyer D, Cyr JM. Survey of Hospital Employees' Personal  
4 Preparedness and Willingness to Work Following a Disaster. *Southern Medical*  
5 *Journal*. 2017;110(8):516-22.  
6  
7
- 8 22. United Nations Office for the Coordination of Humanitarian Affairs. *Humanitarian*  
9 *Bulletin Yemen/ Health system on the verge of collapse*. 2015. [4 p.]. Available  
10 from: [http://reliefweb.int/report/yemen/yemen-humanitarian-bulletin-issue-6-issued-](http://reliefweb.int/report/yemen/yemen-humanitarian-bulletin-issue-6-issued-30-november-2015-enar)  
11 [30-november-2015-enar](http://reliefweb.int/report/yemen/yemen-humanitarian-bulletin-issue-6-issued-30-november-2015-enar)  
12  
13
- 14 23. Qirbi N, Ismail SA. Health system functionality in a low-income country in the  
15 midst of conflict: the case of Yemen. *Health Policy and Planning*. 2017;32(6):911-  
16 22.  
17  
18
- 19 24. United Nations - Headquarters. *Sendai Framework for Disaster Risk Reduction*  
20 *2015-2030*. United Nations Office for Disaster Risk Reduction. 2015. [32 p.].  
21 Available from: <https://www.unisdr.org/we/inform/publications/43291>  
22  
23
- 24 25. Loke AY, Fung WM, Liu X. Mainland China nurses' willingness to report to work  
25 in a disaster. *American Journal of Disaster Medicine*. 2013;8(4):273-82. Doi:  
26 [10.5055/ajdm.2013.0134](https://doi.org/10.5055/ajdm.2013.0134).  
27  
28
- 29 26. Al Khalaileh MA, Bond E, Alasad JA. Jordanian nurses' perceptions of their  
30 preparedness for disaster management. *International emergency nursing*.  
31 *2012;20(1):14-23*.  
32  
33
- 34 27. Alzahrani F, Yiannis K. Emergency nurse disaster preparedness during mass  
35 gatherings: a cross-sectional survey of emergency nurses' perceptions in hospitals in  
36 Mecca, Saudi Arabia. *BMJ Open*. 2017;7(4):e013563.  
37  
38
- 39 28. Ogedegbe C, Nyirenda T, Delmoro G, Yamin E, Feldman J. Health care workers  
40 and disaster preparedness: barriers to and facilitators of willingness to respond.  
41 *International Journal of Emergency Medicine*. 2012;5(1):29.  
42  
43
- 44 29. Stergachis A, Garberson L, Lien O, D'Ambrosio L, Sangare L, Dold C. Health care  
45 workers' ability and willingness to report to work during public health emergencies.  
46 *Disaster Medicine and Public Health Preparedness*. 2011;5(4):300-8.  
47  
48  
49  
50  
51  
52  
53  
54  
55  
56  
57  
58  
59  
60

**Table 1: Socio-demographic, professional, intrapersonal, and willingness Characteristics of Respondents**

| Variable                                             |                                      | Frequency (n= 692) | Percentage (%) |
|------------------------------------------------------|--------------------------------------|--------------------|----------------|
| Age (years)                                          | ≤30                                  | 360                | 52.0           |
|                                                      | 31-45                                | 294                | 42.5           |
|                                                      | ≥46                                  | 38                 | 5.5            |
| Gender                                               | Male                                 | 419                | 60.5           |
|                                                      | Female                               | 273                | 39.5           |
| Marital-status                                       | Single                               | 258                | 37.3           |
|                                                      | Married                              | 420                | 60.7           |
|                                                      | Divorce                              | 8                  | 1.2            |
|                                                      | Widow                                | 6                  | 0.9            |
| Education-level                                      | Diploma                              | 280                | 40.5           |
|                                                      | Bachelor                             | 275                | 39.7           |
|                                                      | Post graduate education              | 137                | 19.8           |
|                                                      | Master                               | 104                | 15.0           |
|                                                      | Professional                         | 33                 | 4.8            |
| Profession type                                      | Doctors                              | 311                | 44.9           |
|                                                      | Specialist medical practitioner      | 126                | 8.2            |
|                                                      | General medical practitioner         | 185                | 26.7           |
|                                                      | Nurses                               | 381                | 55.1           |
| Work duration (years)                                | ≤5                                   | 360                | 52             |
|                                                      | 6-10                                 | 213                | 30.8           |
|                                                      | 11-15                                | 76                 | 11.0           |
|                                                      | ≥16                                  | 43                 | 6.2            |
| Dependent                                            | With dependent                       | 456                | 65.9           |
|                                                      | Elder                                | 65                 | 9.4            |
|                                                      | Child                                | 276                | 39.9           |
|                                                      | Both                                 | 115                | 16.6           |
|                                                      | No dependent                         | 236                | 34.1           |
| <sup>a</sup> Support                                 | No                                   | 119                | 26.1           |
|                                                      | Yes                                  | 337                | 73.9           |
| <sup>b</sup> Previous training                       | With previous training               | 271                | 39.2           |
|                                                      | Without previous training            | 421                | 60.8           |
| <sup>b</sup> Previous experience                     | With previous experience             | 248                | 35.8           |
|                                                      | Without previous training            | 444                | 64.2           |
| Trust in work safety in case of disaster             | High trust in work safety            | 563                | 81.4           |
|                                                      | Low trust in work safety             | 129                | 18.6           |
| Trust in family preparedness in case of a disaster   | High trust in family preparedness    | 544                | 78.6           |
|                                                      | Low trust in family preparedness     | 148                | 21.4           |
| Trust in colleague preparedness to react in disaster | High trust in colleague preparedness | 611                | 88.3           |
|                                                      | Low trust in colleague preparedness  | 81                 | 11.7           |

|                                                      |                                     |     |      |
|------------------------------------------------------|-------------------------------------|-----|------|
| Trust in hospital preparedness to react in disaster  | High trust in hospital preparedness | 522 | 75.4 |
|                                                      | Low trust in hospital preparedness  | 170 | 24.6 |
| Self-efficacy score (Median; Inter-Quartile)         |                                     | 16  | 5    |
| Willingness to participate in Any type of disaster   | High                                | 623 | 90.0 |
|                                                      | Low                                 | 69  | 10.0 |
| Willingness to participate in Natural disaster       | High                                | 535 | 77.3 |
|                                                      | Low                                 | 157 | 22.7 |
| Willingness to participate in Influenza and Pandemic | High                                | 457 | 66.0 |
|                                                      | Low                                 | 235 | 34.0 |

<sup>a</sup>Only for participants with dependants. The percentages are only within participants with dependents.

<sup>b</sup>Previous experience and training in disasters

**Table 2: Descriptive statistics and inter-term correlation for items in self-efficacy**

| Items                                 | Descriptive statistics |       | Inter-item correlation |        |        |        |
|---------------------------------------|------------------------|-------|------------------------|--------|--------|--------|
|                                       | Mean                   | SD    | item 1                 | item 2 | item 3 | item 4 |
| Item 1: Ability to perform work       | 3.36                   | 1.074 | 1.000                  | 0.592  | 0.267  | 0.259  |
| Item 2: Familiarity with their role   | 3.62                   | 1.085 | 0.592                  | 1.000  | 0.325  | 0.324  |
| Item 3: Responsibility to participate | 4.23                   | 0.929 | 0.267                  | 0.325  | 1.000  | 0.390  |
| Item 4: Ability report to work        | 4.03                   | 1.062 | 0.259                  | 0.324  | 0.390  | 1.000  |

For peer review only



**Table 3: Univariate association of crude socio-demographic, professional and intrapersonal characteristics with willingness in any type of disaster, in natural disasters, or in influenza pandemic**

| Variable                        | Willingness to participate in any type of disasters |              | Willingness to participate in natural disasters |                  | Willingness to participate in influenza pandemic |              |
|---------------------------------|-----------------------------------------------------|--------------|-------------------------------------------------|------------------|--------------------------------------------------|--------------|
|                                 | Odds ratio<br>(95% C.I.)                            | p-value      | Odds ratio<br>(95% C.I.)                        | p-value          | Odds ratio<br>(95% C.I.)                         | p-value      |
| <b>Age</b>                      |                                                     |              |                                                 |                  |                                                  |              |
| ≤30                             | 1                                                   | 1            | 1                                               | 1                | 1                                                | 1            |
| 31-45                           | 1.056 (0.628-1.775)                                 | 0.838        | <b>1.639</b> (1.126-2.387)                      | <b>0.010</b>     | 1.138 (0.822-1.576)                              | 0.437        |
| ≥46                             | 0.733 (0.269-1.997)                                 | 0.544        | 1.967 (0.798-4.850)                             | 0.142            | 1.354 (0.650-2.820)                              | 0.418        |
| <b>Gender</b>                   |                                                     |              |                                                 |                  |                                                  |              |
| Female                          | 1                                                   | 1            | 1                                               | 1                | 1                                                | 1            |
| Male                            | <b>2.161</b> (1.307-3.573)                          | <b>0.003</b> | <b>2.254</b> (1.571-3.234)                      | <b>&lt;0.001</b> | <b>1.505</b> (1.093-2.072)                       | <b>0.012</b> |
| <b>Marital status</b>           |                                                     |              |                                                 |                  |                                                  |              |
| Single                          | 1                                                   | 1            | 1                                               | 1                | 1                                                | 1            |
| Married                         | 0.899 (0.532-1.521)                                 | 0.692        | 1.128 (0.781-1.629)                             | 0.521            | 1.090 (0.787-1.510)                              | 0.605        |
| Divorce and widow               | 0.615 (0.130-2.913)                                 | 0.541        | 1.160 (0.314-4.291)                             | 0.824            | 1.362 (0.416-4.466)                              | 0.610        |
| <b>Education Level</b>          |                                                     |              |                                                 |                  |                                                  |              |
| Up to Diploma                   | 1                                                   | 1            | 1                                               | 1                | 1                                                | 1            |
| Up to Bachelor                  | 1.380 (0.775-2.458)                                 | 0.274        | <b>1.962</b> (1.317-2.922)                      | <b>0.001</b>     | 1.221 (0.858-1.738)                              | 0.268        |
| Up to Postgraduate              | 0.847 (0.450-1.596)                                 | 0.608        | <b>2.279</b> (1.351-3.842)                      | <b>0.002</b>     | 0.998 (0.651-1.528)                              | 0.992        |
| <b>Profession type</b>          |                                                     |              |                                                 |                  |                                                  |              |
| Nurses                          | 1                                                   | 1            | 1                                               | 1                | 1                                                | 1            |
| General medical practitioner    | 1.473 (0.781-2.776)                                 | 0.231        | <b>1.554</b> (1.013-2.384)                      | <b>0.044</b>     | 0.756 (0.524-1.091)                              | 0.135        |
| Specialist medical practitioner | 0.965 (0.507-1.835)                                 | 0.913        | <b>2.407</b> (1.377-4.208)                      | <b>0.002</b>     | 0.942 (0.614-1.446)                              | 0.785        |
| <b>Work duration</b>            |                                                     |              |                                                 |                  |                                                  |              |

|                                          |                            |                  |                            |                  |                            |                  |   |
|------------------------------------------|----------------------------|------------------|----------------------------|------------------|----------------------------|------------------|---|
| ≤5                                       | 1                          | 1                | 1                          | 1                | 1                          | 1                | 1 |
| 6-10                                     | 1.006 (0.563-1.798)        | 0.983            | 1.079 (0.721-1.614)        | 0.711            | 0.975 (0.683-1.392)        | 0.889            |   |
| 11-15                                    | 1.028 (0.438-2.415)        | 0.949            | <b>2.337</b> (1.118-4.882) | <b>0.024</b>     | 1.059 (0.626-1.791)        | 0.832            |   |
| ≥16                                      | 0.456 (0.196-1.063)        | 0.069            | 0.650 (0.329-1.286)        | 0.216            | 1.198 (0.603-2.379)        | 0.606            |   |
| <b>Presence of dependent</b>             |                            |                  |                            |                  |                            |                  |   |
| No dependent                             | 1                          | 1                | 1                          | 1                | 1                          | 1                |   |
| Dependent with no support                | 0.673 (0.346-1.308)        | 0.242            | 1.149 (0.683-1.933)        | 0.601            | <b>1.617</b> (1.000-2.612) | <b>0.050</b>     |   |
| Dependent with support                   | 1.253 (0.707-2.222)        | 0.439            | 1.305 (0.880-1.935)        | 0.185            | 1.283 (0.907-1.815)        | 0.158            |   |
| <b><sup>a</sup>Previous training</b>     |                            |                  |                            |                  |                            |                  |   |
| No                                       | 1                          | 1                | 1                          | 1                | 1                          | 1                |   |
| Yes                                      | 1.653 (0.959-2.849)        | 0.070            | 1.090 (0.756-1.573)        | 0.644            | 1.147 (0.829-1.585)        | 0.408            |   |
| <b><sup>a</sup>Previous experience</b>   |                            |                  |                            |                  |                            |                  |   |
| No                                       | 1                          | 1                | 1                          | 1                | 1                          | 1                |   |
| Yes                                      | 1.216 (0.714-2.070)        | 0.471            | 0.974 (0.673-1.411)        | 0.889            | <b>1.857</b> (1.317-2.619) | <b>&lt;0.001</b> |   |
| <b>Trust in work safety</b>              |                            |                  |                            |                  |                            |                  |   |
| Low                                      | 1                          | 1                | 1                          | 1                | 1                          | 1                |   |
| High                                     | <b>3.284</b> (1.937-5.567) | <b>&lt;0.001</b> | 1.280 (0.825-1.987)        | 0.271            | 1.192 (0.800-1.774)        | 0.388            |   |
| <b>Trust in family preparedness</b>      |                            |                  |                            |                  |                            |                  |   |
| Low                                      | 1                          | 1                | 1                          | 1                | 1                          | 1                |   |
| High                                     | 1.338 (0.756-2.369)        | 0.317            | 1.292 (0.850-1.963)        | 0.231            | 0.990 (0.674-1.454)        | 0.959            |   |
| <b>Trust in colleague's preparedness</b> |                            |                  |                            |                  |                            |                  |   |
| Low                                      | 1                          | 1                | 1                          | 1                | 1                          | 1                |   |
| High                                     | <b>2.592</b> (1.401-4.795) | <b>0.002</b>     | <b>1.974</b> (1.200-3.246) | <b>0.007</b>     | 1.392 (0.866-2.237)        | 0.172            |   |
| <b>Trust in hospital preparedness</b>    |                            |                  |                            |                  |                            |                  |   |
| Low                                      | 1                          | 1                | 1                          | 1                | 1                          | 1                |   |
| High                                     | 1.392 (0.807-2.400)        | 0.234            | 1.212 (0.810-1.814)        | 0.351            | 1.158 (0.807-1.663)        | 0.426            |   |
| <b><sup>b</sup>Self-efficacy</b>         |                            |                  |                            |                  |                            |                  |   |
|                                          | <b>1.358</b> (1.247-1.479) | <b>&lt;0.001</b> | <b>1.184</b> (1.115-1.257) | <b>&lt;0.001</b> | <b>1.135</b> (1.076-1.197) | <b>&lt;0.001</b> |   |

1  
2  
3  
4  
5  
6  
7  
8  
9  
10  
11  
12  
13  
14  
15  
16  
17  
18  
19  
20  
21  
22  
23  
24  
25  
26  
27  
28  
29  
30  
31  
32  
33  
34  
35  
36  
37  
38  
39  
40  
41  
42  
43  
44  
45  
46

---

<sup>a</sup>Previous experience and training in disasters

<sup>b</sup>*Continuous measure, with one unit increase in self-efficacy*

---

For peer review only

**Table 4: Multivariate association of adjusted professional and intrapersonal characteristics with willingness in any type of disaster, in natural disasters, or in influenza pandemic**

| Variable                        | Willingness to participate in any type of disasters |              | Willingness to participate in natural disasters |              | Willingness to participate in influenza pandemic |         |
|---------------------------------|-----------------------------------------------------|--------------|-------------------------------------------------|--------------|--------------------------------------------------|---------|
|                                 | Odds ratio (95% C.I.)                               | p-value      | Odds ratio (95% C.I.)                           | p-value      | Odds ratio (95% C.I.)                            | p-value |
| <b>Age</b>                      |                                                     |              |                                                 |              |                                                  |         |
| ≤30                             | 1                                                   | 1            | 1                                               | 1            | 1                                                | 1       |
| 31-45                           | 1.137 (0.609-2.121)                                 | 0.687        | 1.432 (0.928-2.209)                             | 0.105        | 1.008 (0.695-1.461)                              | 0.967   |
| ≥46                             | 0.440 (0.136-1.418)                                 | 0.169        | 1.087 (0.409-2.886)                             | 0.867        | 1.062 (0.484-2.332)                              | 0.880   |
| <b>Gender</b>                   |                                                     |              |                                                 |              |                                                  |         |
| Female                          | 1                                                   | 1            | 1                                               | 1            | 1                                                | 1       |
| Male                            | 1.456 (0.807-2.628)                                 | <b>0.212</b> | <b>1.639</b> (1.102-2.439)                      | <b>0.015</b> | 1.131 (0.793-1.612)                              | 0.498   |
| <b>Education Level</b>          |                                                     |              |                                                 |              |                                                  |         |
| Up to Diploma                   | -                                                   | -            | 1                                               | 1            | -                                                | -       |
| Up to Bachelor                  | -                                                   | -            | 1.706 (0.993-2.932)                             | 0.053        | -                                                | -       |
| Up to Postgraduate              | -                                                   | -            | 1.177 (0.522-2.657)                             | 0.695        | -                                                | -       |
| <b>Profession type</b>          |                                                     |              |                                                 |              |                                                  |         |
| Nurses                          | 1                                                   | 1            | 1                                               | 1            | 1                                                | 1       |
| General medical practitioner    | 1.285 (0.438-3.767)                                 | 0.261        | 1.581 (0.691-3.614)                             | 0.278        | 0.751 (0.468-1.205)                              | 0.235   |
| Specialist medical practitioner | 1.392 (0.578-3.352)                                 | 0.644        | 0.939 (0.515-1.713)                             | 0.838        | 0.697 (0.473-1.026)                              | 0.067   |
| <b>Presence of dependent</b>    |                                                     |              |                                                 |              |                                                  |         |
| No dependent                    | -                                                   | -            | -                                               | -            | 1                                                | 1       |
| Dependent with no support       | -                                                   | -            | -                                               | -            | 1.537 (0.910-2.598)                              | 0.108   |
| Dependent with support          | -                                                   | -            | -                                               | -            | 1.154 (0.791-1.685)                              | 0.457   |

1  
2  
3  
4  
5  
6  
7  
8  
9  
10  
11  
12  
13  
14  
15  
16  
17  
18  
19  
20  
21  
22  
23  
24  
25  
26  
27  
28  
29  
30  
31  
32  
33  
34  
35  
36  
37  
38  
39  
40  
41  
42  
43  
44  
45  
46

|                                                                          |                            |                  |                            |                  |                            |                  |
|--------------------------------------------------------------------------|----------------------------|------------------|----------------------------|------------------|----------------------------|------------------|
| <b><sup>a</sup>Previous experience</b>                                   |                            |                  |                            |                  |                            |                  |
| No                                                                       | -                          | -                | -                          | -                | 1                          | 1                |
| Yes                                                                      | -                          | -                | -                          | -                | <b>1.528</b> (1.058-2.207) | <b>0.024</b>     |
| <b>Trust in work safety</b>                                              |                            |                  |                            |                  |                            |                  |
| Low                                                                      | 1                          | 1                | -                          | -                | -                          | -                |
| High                                                                     | <b>2.535</b> (1.357-4.736) | <b>0.004</b>     | -                          | -                | -                          | -                |
| <b>Trust in colleague's preparedness</b>                                 |                            |                  |                            |                  |                            |                  |
| Low                                                                      | 1                          | 1                | 1                          | 1                | -                          | -                |
| High                                                                     | 1.199 (0.576-2.496)        | 0.686            | 1.363 (0.791-2.351)        | 0.265            | -                          | -                |
| <b><sup>b</sup>Self-efficacy</b>                                         | <b>1.319</b> (1.197-1.453) | <b>&lt;0.001</b> | <b>1.143</b> (1.069-1.221) | <b>&lt;0.001</b> | <b>1.114</b> (1.050-1.182) | <b>&lt;0.001</b> |
| <sup>a</sup> Previous experience and training in disasters               |                            |                  |                            |                  |                            |                  |
| <sup>b</sup> Continuous measure, with one unit increase in self-efficacy |                            |                  |                            |                  |                            |                  |

Peer review only

**SECTION ONE:**

Please tick (✓) in the appropriate box

1. **Age:** \_\_\_\_\_

2. **Gender :**

Male

Female

3. **Marital status:**

Single

Married

Divorce

Widow/er

4. **Highest Education level completed :**

Diploma

Bachelor

Masters

Professional

5. **What is your primary job category?**

Specialist medical practitioner

General medical practitioner

Nurse

6. **Duration of work at the hospital:** \_\_\_\_\_ Years.

7. Do you have any of the following responsibilities ( you can choose more than one choice):

Children  Elders  None

8. Do you have any one who can take care of the previously mentioned responsibilities in case of your absence?

Yes  No

**SECTION TWO**

Please tick (✓) in the appropriate box:

1. Have you participated in a disaster before?

Yes  No

2. Have attended any previous disaster trainings?

Yes  No

**SECTION THREE:**

**Part A:**

| NO | Questions                                                           | Strongly disagree (1) | Disagree (2) | Somewhat agree (3) | Agree (4) | Strongly agree (5) |
|----|---------------------------------------------------------------------|-----------------------|--------------|--------------------|-----------|--------------------|
| 1. | I am confident of my personal safety at work in case of a disaster. |                       |              |                    |           |                    |

|    |                                                                                         |  |  |  |  |  |
|----|-----------------------------------------------------------------------------------------|--|--|--|--|--|
|    |                                                                                         |  |  |  |  |  |
| 2. | I am assured that my family is prepared to function in in my absence during a disaster. |  |  |  |  |  |
| 3. | I am sure that my colleagues are able to perform their duties during a disaster.        |  |  |  |  |  |
| 4. | The hospital is prepared to provide effective response in case of a disaster.           |  |  |  |  |  |

**PART B:**

| NO | Statement                                                                                  | Strongly disagree<br>(1) | Disagree<br>(2) | Somewhat agree<br>(3) | Agree<br>(4) | Strongly agree<br>(5) |
|----|--------------------------------------------------------------------------------------------|--------------------------|-----------------|-----------------------|--------------|-----------------------|
| 1. | I am able to treat patients of different type of disasters.                                |                          |                 |                       |              |                       |
| 2. | I am confident that I can perform my role in the hospital following any type of disasters. |                          |                 |                       |              |                       |
| 3. | I feel that it is my duty to work in the event of a disaster.                              |                          |                 |                       |              |                       |
| 4. | I will be able to report to work at the hospital during an event of a disaster.            |                          |                 |                       |              |                       |



1  
2  
3  
4  
5  
6  
7  
8  
9  
10  
11  
12  
13  
14  
15  
16  
17  
18  
19  
20  
21  
22  
23  
24  
25  
26  
27  
28  
29  
30  
31  
32  
33  
34  
35  
36  
37  
38  
39  
40  
41  
42  
43  
44  
45  
46

**SECTION FOUR:**

| NO | Statement                                                                        | Strongly disagree (1) | Disagree (2) | Somewhat agree (3) | Agree (4) | Strongly agree (5) |
|----|----------------------------------------------------------------------------------|-----------------------|--------------|--------------------|-----------|--------------------|
| 1. | I am willing to participate in any type of disaster regardless of its severity   |                       |              |                    |           |                    |
| 2. | I am willing to participate in natural disasters (earthquake, floods or cyclone) |                       |              |                    |           |                    |
| 3. | I am you willing to participate in influenza pandemic                            |                       |              |                    |           |                    |

# Reporting checklist for cross sectional study.

Based on the STROBE cross sectional guidelines.

## Instructions to authors

Complete this checklist by entering the page numbers from your manuscript where readers will find each of the items listed below.

Your article may not currently address all the items on the checklist. Please modify your text to include the missing information. If you are certain that an item does not apply, please write "n/a" and provide a short explanation.

Upload your completed checklist as an extra file when you submit to a journal.

In your methods section, say that you used the STROBE cross sectional reporting guidelines, and cite them as:

von Elm E, Altman DG, Egger M, Pocock SJ, Gotsche PC, Vandenbroucke JP. The Strengthening the Reporting of Observational Studies in Epidemiology (STROBE) Statement: guidelines for reporting observational studies.

|              |                     | Reporting Item                                                                                  | Page Number          |
|--------------|---------------------|-------------------------------------------------------------------------------------------------|----------------------|
| Title        | <a href="#">#1a</a> | Indicate the study's design with a commonly used term in the title or the abstract              | Main document<br>(1) |
| Abstract     | <a href="#">#1b</a> | Provide in the abstract an informative and balanced summary of what was done and what was found | Main document<br>(1) |
| Background / | <a href="#">#2</a>  | Explain the scientific background and rationale for the                                         | Main document        |

|    |                      |                     |                                                            |               |
|----|----------------------|---------------------|------------------------------------------------------------|---------------|
| 1  | rationale            |                     | investigation being reported                               | (3)           |
| 2  |                      |                     |                                                            |               |
| 3  |                      |                     |                                                            |               |
| 4  | Objectives           | <a href="#">#3</a>  | State specific objectives, including any prespecified      | Main document |
| 5  |                      |                     | hypotheses                                                 | (4)           |
| 6  |                      |                     |                                                            |               |
| 7  |                      |                     |                                                            |               |
| 8  |                      |                     |                                                            |               |
| 9  | Study design         | <a href="#">#4</a>  | Present key elements of study design early in the paper    | Main document |
| 10 |                      |                     |                                                            | (4)           |
| 11 |                      |                     |                                                            |               |
| 12 |                      |                     |                                                            |               |
| 13 |                      |                     |                                                            |               |
| 14 | Setting              | <a href="#">#5</a>  | Describe the setting, locations, and relevant dates,       | Main document |
| 15 |                      |                     | including periods of recruitment, exposure, follow-up,     | (4-6)         |
| 16 |                      |                     | and data collection                                        |               |
| 17 |                      |                     |                                                            |               |
| 18 |                      |                     |                                                            |               |
| 19 |                      |                     |                                                            |               |
| 20 |                      |                     |                                                            |               |
| 21 |                      |                     |                                                            |               |
| 22 | Eligibility criteria | <a href="#">#6a</a> | Give the eligibility criteria, and the sources and methods | Main document |
| 23 |                      |                     | of selection of participants.                              | (4)           |
| 24 |                      |                     |                                                            |               |
| 25 |                      |                     |                                                            |               |
| 26 |                      |                     |                                                            |               |
| 27 |                      | <a href="#">#7</a>  | Clearly define all outcomes, exposures, predictors,        | Main document |
| 28 |                      |                     | potential confounders, and effect modifiers. Give          | (5), table1   |
| 29 |                      |                     | diagnostic criteria, if applicable                         | (Page 18)     |
| 30 |                      |                     |                                                            |               |
| 31 |                      |                     |                                                            |               |
| 32 |                      |                     |                                                            |               |
| 33 |                      |                     |                                                            |               |
| 34 |                      |                     |                                                            |               |
| 35 | Data sources /       | <a href="#">#8</a>  | For each variable of interest give sources of data and     | Main document |
| 36 | measurement          |                     | details of methods of assessment (measurement).            | (5)           |
| 37 |                      |                     | Describe comparability of assessment methods if there      |               |
| 38 |                      |                     | is more than one group. Give information separately for    |               |
| 39 |                      |                     | exposed and unexposed groups if applicable.                |               |
| 40 |                      |                     |                                                            |               |
| 41 |                      |                     |                                                            |               |
| 42 |                      |                     |                                                            |               |
| 43 |                      |                     |                                                            |               |
| 44 |                      |                     |                                                            |               |
| 45 |                      |                     |                                                            |               |
| 46 |                      |                     |                                                            |               |
| 47 | Bias                 | <a href="#">#9</a>  | Describe any efforts to address potential sources of bias  | Main document |
| 48 |                      |                     |                                                            | (13)          |
| 49 |                      |                     |                                                            |               |
| 50 |                      |                     |                                                            |               |
| 51 |                      |                     |                                                            |               |
| 52 | Study size           | <a href="#">#10</a> | Explain how the study size was arrived at                  | Main document |
| 53 |                      |                     |                                                            | (4,5)         |
| 54 |                      |                     |                                                            |               |
| 55 |                      |                     |                                                            |               |
| 56 |                      |                     |                                                            |               |
| 57 |                      |                     |                                                            |               |
| 58 | Quantitative         | <a href="#">#11</a> | Explain how quantitative variables were handled in the     | Main document |
| 59 |                      |                     |                                                            |               |
| 60 |                      |                     |                                                            |               |

|    |                  |                                                                                |                |
|----|------------------|--------------------------------------------------------------------------------|----------------|
| 1  | variables        | analyses. If applicable, describe which groupings were                         | (6)            |
| 2  |                  |                                                                                |                |
| 3  |                  | chosen, and why                                                                |                |
| 4  |                  |                                                                                |                |
| 5  |                  |                                                                                |                |
| 6  | Statistical      | <a href="#">#12a</a> Describe all statistical methods, including those used to | Main document  |
| 7  |                  |                                                                                |                |
| 8  | methods          | control for confounding                                                        | (6)            |
| 9  |                  |                                                                                |                |
| 10 |                  |                                                                                |                |
| 11 |                  | <a href="#">#12b</a> Describe any methods used to examine subgroups and        | Main document  |
| 12 |                  |                                                                                |                |
| 13 |                  | interactions                                                                   | (6)            |
| 14 |                  |                                                                                |                |
| 15 |                  |                                                                                |                |
| 16 |                  | <a href="#">#12c</a> Explain how missing data were addressed                   | Main document  |
| 17 |                  |                                                                                |                |
| 18 |                  |                                                                                | (6)            |
| 19 |                  |                                                                                |                |
| 20 |                  |                                                                                |                |
| 21 |                  |                                                                                |                |
| 22 |                  | <a href="#">#12d</a> If applicable, describe analytical methods taking account | Main document  |
| 23 |                  |                                                                                |                |
| 24 |                  | of sampling strategy                                                           | (4, 6)         |
| 25 |                  |                                                                                |                |
| 26 |                  |                                                                                |                |
| 27 |                  | <a href="#">#12e</a> Describe any sensitivity analyses                         |                |
| 28 |                  |                                                                                |                |
| 29 |                  |                                                                                |                |
| 30 | Participants     | <a href="#">#13a</a> Report numbers of individuals at each stage of study—     | Main document  |
| 31 |                  |                                                                                |                |
| 32 |                  | eg numbers potentially eligible, examined for eligibility,                     | (4, 6)         |
| 33 |                  |                                                                                |                |
| 34 |                  | confirmed eligible, included in the study, completing                          |                |
| 35 |                  |                                                                                |                |
| 36 |                  | follow-up, and analysed. Give information separately for                       |                |
| 37 |                  |                                                                                |                |
| 38 |                  | for exposed and unexposed groups if applicable.                                |                |
| 39 |                  |                                                                                |                |
| 40 |                  |                                                                                |                |
| 41 |                  |                                                                                |                |
| 42 |                  | <a href="#">#13b</a> Give reasons for non-participation at each stage          | Main document  |
| 43 |                  |                                                                                |                |
| 44 |                  |                                                                                |                |
| 45 |                  |                                                                                | (4, 6, 13)     |
| 46 |                  |                                                                                |                |
| 47 |                  |                                                                                |                |
| 48 |                  | <a href="#">#13c</a> Consider use of a flow diagram                            |                |
| 49 |                  |                                                                                |                |
| 50 |                  |                                                                                |                |
| 51 | Descriptive data | <a href="#">#14a</a> Give characteristics of study participants (eg            | Main document  |
| 52 |                  |                                                                                |                |
| 53 |                  | demographic, clinical, social) and information on                              | (7,8), table 2 |
| 54 |                  |                                                                                |                |
| 55 |                  | exposures and potential confounders. Give information                          | (page 19, 20)  |
| 56 |                  |                                                                                |                |
| 57 |                  | separately for exposed and unexposed groups if                                 |                |
| 58 |                  |                                                                                |                |
| 59 |                  |                                                                                |                |
| 60 |                  |                                                                                |                |

applicable.

|    |                |                      |                                                              |
|----|----------------|----------------------|--------------------------------------------------------------|
| 1  |                |                      |                                                              |
| 2  |                |                      |                                                              |
| 3  |                |                      |                                                              |
| 4  |                | <a href="#">#14b</a> | Indicate number of participants with missing data for        |
| 5  |                |                      | each variable of interest                                    |
| 6  |                |                      | Table 2 (page                                                |
| 7  |                |                      | 19, 20)                                                      |
| 8  |                |                      |                                                              |
| 9  | Outcome data   | <a href="#">#15</a>  | Report numbers of outcome events or summary                  |
| 10 |                |                      | Measures. Give information separately for exposed and        |
| 11 |                |                      | unexposed groups if applicable.                              |
| 12 |                |                      | Main document                                                |
| 13 |                |                      | (7), table 2                                                 |
| 14 |                |                      | (page 19, 20)                                                |
| 15 |                |                      |                                                              |
| 16 | Main results   | <a href="#">#16a</a> | Give unadjusted estimates and, if applicable,                |
| 17 |                |                      | confounder-adjusted estimates and their precision (eg,       |
| 18 |                |                      | 95% confidence interval). Make clear which confounders       |
| 19 |                |                      | were adjusted for and why they were included                 |
| 20 |                |                      | Main document                                                |
| 21 |                |                      | (8, 9), table 3,                                             |
| 22 |                |                      | 4 (page 21-23)                                               |
| 23 |                |                      |                                                              |
| 24 |                |                      |                                                              |
| 25 |                |                      |                                                              |
| 26 |                | <a href="#">#16b</a> | Report category boundaries when continuous variables         |
| 27 |                |                      | were categorized                                             |
| 28 |                |                      | Main document                                                |
| 29 |                |                      | 5                                                            |
| 30 |                |                      |                                                              |
| 31 |                |                      |                                                              |
| 32 |                | <a href="#">#16c</a> | If relevant, consider translating estimates of relative risk |
| 33 |                |                      | into absolute risk for a meaningful time period              |
| 34 |                |                      |                                                              |
| 35 |                |                      |                                                              |
| 36 |                |                      |                                                              |
| 37 | Other analyses | <a href="#">#17</a>  | Report other analyses done—e.g., analyses of                 |
| 38 |                |                      | subgroups and interactions, and sensitivity analyses         |
| 39 |                |                      |                                                              |
| 40 |                |                      |                                                              |
| 41 |                |                      |                                                              |
| 42 | Key results    | <a href="#">#18</a>  | Summarise key results with reference to study objectives     |
| 43 |                |                      | Main document                                                |
| 44 |                |                      | (6-9)                                                        |
| 45 |                |                      |                                                              |
| 46 |                |                      |                                                              |
| 47 |                |                      |                                                              |
| 48 | Limitations    | <a href="#">#19</a>  | Discuss limitations of the study, taking into account        |
| 49 |                |                      | sources of potential bias or imprecision. Discuss both       |
| 50 |                |                      | direction and magnitude of any potential bias.               |
| 51 |                |                      | Main document                                                |
| 52 |                |                      | (12, 13)                                                     |
| 53 |                |                      |                                                              |
| 54 |                |                      |                                                              |
| 55 | Interpretation | <a href="#">#20</a>  | Give a cautious overall interpretation considering           |
| 56 |                |                      | objectives, limitations, multiplicity of analyses, results   |
| 57 |                |                      | Main document                                                |
| 58 |                |                      | (9-12)                                                       |
| 59 |                |                      |                                                              |
| 60 |                |                      |                                                              |

1 from similar studies, and other relevant evidence.

2  
3  
4 Generalisability [#21](#) Discuss the generalisability (external validity) of the Main document  
5 study results (13)  
6  
7

8  
9 Funding [#22](#) Give the source of funding and the role of the funders for Main document  
10 the present study and, if applicable, for the original study (14)  
11 on which the present article is based  
12  
13  
14  
15

16  
17 The STROBE checklist is distributed under the terms of the Creative Commons Attribution License  
18 CC-BY. This checklist can be completed online using <https://www.goodreports.org/>, a tool made by  
19 the [EQUATOR Network](#) in collaboration with [Penelope.ai](#)  
20  
21  
22  
23  
24  
25  
26  
27  
28  
29  
30  
31  
32  
33  
34  
35  
36  
37  
38  
39  
40  
41  
42  
43  
44  
45  
46  
47  
48  
49  
50  
51  
52  
53  
54  
55  
56  
57  
58  
59  
60

# BMJ Open

## Factors associated with Healthcare Workers Willingness to Participate in Disasters: a cross-sectional study in Sana'a, Yemen

|                                 |                                                                                                                                                                                            |
|---------------------------------|--------------------------------------------------------------------------------------------------------------------------------------------------------------------------------------------|
| Journal:                        | <i>BMJ Open</i>                                                                                                                                                                            |
| Manuscript ID                   | bmjopen-2019-030547.R2                                                                                                                                                                     |
| Article Type:                   | Original research                                                                                                                                                                          |
| Date Submitted by the Author:   | 04-Sep-2019                                                                                                                                                                                |
| Complete List of Authors:       | Al-Hunaishi, Weiam; University of Malaya, Department of Social and Preventive Medicine<br>Hoe, Victor; Universiti Malaya<br>Chinna, Karuthan ; Taylor's University, School of Medicine-SRI |
| <b>Primary Subject Heading</b>: | Public health                                                                                                                                                                              |
| Secondary Subject Heading:      | Global health, Health services research, Public health                                                                                                                                     |
| Keywords:                       | Disaster preparedness, willingness, self-efficacy, healthcare worker, intrapersonal                                                                                                        |
|                                 |                                                                                                                                                                                            |

SCHOLARONE™  
Manuscripts

1  
2  
3  
4  
5 **Factors associated with Healthcare Workers Willingness to Participate in Disasters: a**  
6  
7 **cross-sectional study in Sana'a, Yemen**  
8  
9

10 **Authors' names, credentials/degrees, email addresses and institutional affiliations:**  
11

- 12  
13 1. **MPH. MD. Weiam Al-Hunaishi (WA):** Department of Social & Preventive Medicine,  
14 Faculty of Medicine, University of Malaya, Kuala Lumpur, Malaysia. (e-mail:  
15 waam59@hotmail.com)  
16  
17  
18  
19 2. **Prof. Dr. Victor CW Hoe (VCWH):** Centre for Occupational and Environmental Health,  
20 Department of Social & Preventive Medicine, Faculty of Medicine, University of Malaya,  
21 Kuala Lumpur, Malaysia. (e-mail: victor@ummc.edu.my)  
22  
23  
24  
25  
26 3. **Associate Prof. Dr. Karuthan Chinna (KC):** School of Medicine-SRI, Faculty of Health &  
27 Medical Sciences, Taylor's University, Malaysia. (e-mail: karuthan.chinna@taylors.edu.my)  
28  
29  
30

31 **Correspondence and reprint requests:** to Weiam Al-Hunaishi (e-mail: [Waam59@hotmail.com](mailto:Waam59@hotmail.com),  
32 telephone number: +60173479802, mail address: Department of Social and Preventive Medicine  
33 Faculty of Medicine, University of Malaya, 50603 Kuala Lumpur, Malaysia).  
34  
35  
36  
37

38 **Contributorship statement:**  
39

- 40  
41 • WA – conceptualized the study, conducted the data collection, analysis, and interpretation of  
42 data for the work; draft and approve the manuscript for publication.  
43  
44  
45 • VCWH – conceptualized the study, interpretation of data for the work; revise and approve the  
46 manuscript for publication.  
47  
48  
49  
50 • KC – conceptualized the study, supervised the data analysis, interpretation of data for the  
51 work.  
52  
53  
54  
55  
56  
57  
58  
59  
60



1  
2  
3 **List of Abbreviations:**  
4  
5

|    |     |                     |
|----|-----|---------------------|
| 6  | CI  | Confidence Interval |
| 7  |     |                     |
| 8  | HCW | Healthcare workers  |
| 9  |     |                     |
| 10 | IQR | Interquartile range |
| 11 |     |                     |
| 12 | SD  | Standard Deviation  |
| 13 |     |                     |
| 14 |     |                     |
| 15 |     |                     |
| 16 |     |                     |
| 17 |     |                     |
| 18 |     |                     |
| 19 |     |                     |
| 20 |     |                     |
| 21 |     |                     |
| 22 |     |                     |
| 23 |     |                     |
| 24 |     |                     |
| 25 |     |                     |
| 26 |     |                     |
| 27 |     |                     |
| 28 |     |                     |
| 29 |     |                     |
| 30 |     |                     |
| 31 |     |                     |
| 32 |     |                     |
| 33 |     |                     |
| 34 |     |                     |
| 35 |     |                     |
| 36 |     |                     |
| 37 |     |                     |
| 38 |     |                     |
| 39 |     |                     |
| 40 |     |                     |
| 41 |     |                     |
| 42 |     |                     |
| 43 |     |                     |
| 44 |     |                     |
| 45 |     |                     |
| 46 |     |                     |
| 47 |     |                     |
| 48 |     |                     |
| 49 |     |                     |
| 50 |     |                     |
| 51 |     |                     |
| 52 |     |                     |
| 53 |     |                     |
| 54 |     |                     |
| 55 |     |                     |
| 56 |     |                     |
| 57 |     |                     |
| 58 |     |                     |
| 59 |     |                     |
| 60 |     |                     |

For peer review only

## Abstract

**Objectives:** Willingness to participate in disasters are usually overlooked and not addressed in disaster preparedness training courses to ensure health service coverage. This will lead to issues during the disaster's response. This study, therefore, aims to assess healthcare workers willingness to participate in biological and natural disasters, and to identify its associated factors.

**Design:** This is a cross-sectional study using a self-administered questionnaire. The questionnaire was distributed to 1093 healthcare workers. The data was analysed using multiple logistic regression with significance level  $p < 0.05$ . Ethical clearance and consent of the participants were duly obtained.

**Setting:** In three public Hospitals that provide tertiary level healthcare in Sana'a City, Yemen.

**Participants:** There were 692 nurses and doctors (response rate 63.3%) completed the questionnaires.

**Results:** Almost half of the participants 55.1% were nurses and 44.9% were doctors. The study found that self-efficacy was associated with willingness to participate in disaster response for any type of disasters (Odds Ratio [OR]=1.328, 95% Confidence Interval [95%CI]: 1.206 to 1.464), natural disasters (OR=1.138, 95%CI: 1.064 to 1.217), and influenza pandemic (OR=1.112, 95%CI: 1.049 to 1.180). The results further show that willingness is associated with healthcare workers being young, male and having higher educational qualifications.

**Conclusion:** Self-efficacy has been found to be an important factor associated with willingness. Improving self-efficacy through training in disaster preparedness may increase willingness of healthcare workers to participate in a disaster.

1  
2  
3 **Key words:** Disaster preparedness; willingness; self-efficacy; intrapersonal; healthcare  
4  
5 worker.  
6  
7

### 8 **Strength and limitations of this study** 9

- 10  
11 - This study is the first study that attempts to assess Healthcare workers willingness to  
12 participate in different types of disasters in Sana'a City, Yemen.  
13  
14 - Implementing a cross-sectional design and using a convenience sample has made it  
15 difficult to establish causal association.  
16  
17 - The study sample represents healthcare workers in Sana'a City in terms of gender and  
18 locality.  
19  
20 - The face to face approach, which included introduction of the study and its objectives,  
21 ensured a higher response rate and minimised the risk of selection bias.  
22  
23  
24  
25  
26  
27  
28  
29  
30  
31  
32  
33  
34  
35  
36  
37  
38  
39  
40  
41  
42  
43  
44  
45  
46  
47  
48  
49  
50  
51  
52  
53  
54  
55  
56  
57  
58  
59  
60

## Introduction:

In various parts of the world, disasters destroy communities and infrastructures, causing huge material and human losses.<sup>1</sup> Similarly, hospitals and health centres are also affected by the disasters, which restrict its work of relieving disaster-stricken communities. By 2025, more than half of the world population will live in cities, particularly in urban cities located along seismic fault lines, flood and other natural disaster-prone areas.<sup>2</sup> Therefore, healthcare workers (HCW) should be prepared to manage the influx of patients during possibly life threatening circumstances. A healthcare worker is defined as “the one who delivers care and services to the sick and ailing either directly as doctors and nurses or indirectly as aides, helpers, laboratory technicians, or even medical waste handlers”.<sup>3</sup>

According to the Global Facility for Disaster Reduction and Recovery (GFDRR), Yemen is one of the priority countries in the Middle East and North African region, mainly due to its vulnerability to disasters.<sup>4-6</sup> Natural disasters, which includes storms, landslides, earthquake and floods are recurrent in Yemen. Floods due to the monsoonal rainfall, is responsible for most of the mortality due to disasters.<sup>6</sup> Currently in Yemen, disaster management mainly focuses on responding to post disasters damage, and there is a lack of disaster preparedness, such as training and mock drills. The insufficient training makes it difficult to maintain preparedness.<sup>4,7,8</sup> A competent prepared healthcare worker could better mitigate and respond to the community health needs during crises, which in turn will elevate health outcomes.

During disasters, HCW are expected to provide health care assistance to people suffering from the disasters alongside with caring for their usual patients. Some are also required to care for their dependents. Most of the previous studies reported an anticipated decrease in health workforce during a disaster as not all HCW are willing to participate in a

1  
2  
3 disaster. Therefore, understanding the factors associated with willingness to participate in a  
4  
5 disaster would allow more effective planning for a disaster situation. Systematic reviews have  
6  
7 found that willingness was associated with factors like the nature and type of event;  
8  
9 competing obligations between personal and professional needs; the work environment and  
10  
11 climate including personal safety, and the relationship between knowledge and perceptions of  
12  
13 efficacy.<sup>9,10</sup>  
14  
15

16  
17 Disaster preparedness activities and routine disasters trainings have been found to  
18  
19 improve the knowledge, skills and attitude preparedness of disasters.<sup>11</sup> However, the factors  
20  
21 that affect the willingness to participate in disasters are beyond just having knowledge on  
22  
23 disaster management.<sup>9-12</sup>  
24  
25

26  
27 In a recent systematic review, they found only few studies that have been conducted  
28  
29 in the Middle East on the willingness to participate in disasters. They recommend that further  
30  
31 research should be conducted based on behavioural theories to better understand the Middle  
32  
33 East context of willingness to participate in a disaster.<sup>13</sup> In another systematic review of 70  
34  
35 studies on HCW willingness to participate in disasters, only 12 studies were from Asia and  
36  
37 none of those studies were from the Middle East.<sup>11</sup> Therefore, the objective of this study is to  
38  
39 determine the associations between socio-demographic, professional, and intrapersonal  
40  
41 factors associated with the doctors' and nurses' willingness to participate in disasters  
42  
43 response in Sana'a, Yemen. The study factors are built based on the self-efficacy behavioural  
44  
45 theory.  
46  
47  
48  
49

## 50 **Methods:**

### 51 **Study design, population and instrument**

52  
53 This is a cross-sectional study conducted in three public hospitals in the Sana'a  
54  
55 Governorate, Yemen; Al-Thora, Al-Jumhuri, and Al-Kuwait hospitals, which have more  
56  
57  
58  
59  
60

1  
2  
3 than a total of 4,000 nurses and doctors, which is the focus of this study. Out of this, 1093  
4  
5 HCW were selected through convenient sampling by approaching the healthcare workers  
6  
7 individually. The sample size calculation was determined using the OpenEpi software. It was  
8  
9 based on a 95% confidence interval with a power of set to 80%. The sample size of 1093 was  
10  
11 determined based on the variable “perception of responsibility to participate” from a pre-  
12  
13 study, which is an element of the self-efficacy construct with the highest sample size to  
14  
15 achieve an association.<sup>14</sup> The determined sample size was 614, which was inflated by 78  
16  
17 percent based on the lowest response rate of previous studies to reach 1093.<sup>15</sup>  
18  
19  
20  
21

22 The questionnaire was developed by the researcher based on information from  
23  
24 previous studies and opinions of national and international experts (supplementary  
25  
26 martial).<sup>15-18</sup> The questionnaire was pre tested for validity and reliability. The questionnaire  
27  
28 was distributed to national and international experts together with questions on the validity of  
29  
30 the questionnaire with a scale of 1 to 4 (1 not relevant to 4 highly relevant). It tested the  
31  
32 questionnaire’s consistency, relatedness, representativeness and clarity of wording. From the  
33  
34 results of the pre-test, six items of the questionnaire that was related to the knowledge  
35  
36 construct, was deleted and changes on the questions were reworded. The revised  
37  
38 questionnaires were then forward and backward-translated form English to Arabic and from  
39  
40 Arabic to English. Following that, three other HCW were asked to give their opinion on the  
41  
42 questions based on the objective of the study.  
43  
44  
45  
46  
47

48 The final questionnaire was pilot tested on 20 doctors and nurses from a hospital,  
49  
50 other than hospitals that have been chosen for the study. The internal consistency was  
51  
52 assessed using Cronbach’s alpha. Self- efficacy was 0.801 and this is considered good inter-  
53  
54 correlation. Therefore, the self-efficacy four items were used in the final survey to build the  
55  
56 construct as one of the intrapersonal factors (unpublished).  
57  
58  
59  
60

1  
2  
3 The questionnaire consists of socio-demographic, professional, and intrapersonal  
4 factors, and willingness to participate in a disaster. The professional, intrapersonal and  
5 willingness questions were measured on a five-point Likert scale (1=strongly disagree,  
6 2=disagree, 3=somewhat agree, 4=agree, and 5=strongly agree). A binary variable was  
7 created based on “less or equal two” as low and “more than 2” as high.  
8  
9  
10  
11  
12  
13  
14

### 15 **Self-efficacy theory**

16  
17 The self-efficacy theory was chosen to build the self-efficacy construct as it illustrates  
18 beliefs that drive actions to face and solve problems that are faced to achieve the intended  
19 goals. In case of disaster, the theory could be applied to HCW who are coping with fear and  
20 threat and adapting new behaviours because of their beliefs in their competences. This belief  
21 is derived from their successful performances, observing colleagues and managers positive  
22 behaviours, convincing by a superior person, and calming the physiological and emotional  
23 pressure caused by the threat.<sup>19</sup>  
24  
25  
26  
27  
28  
29  
30  
31  
32  
33  
34  
35  
36

### 37 **Data collection**

38  
39 Ethical approval was obtained from the Ministry of Health and Population of Yemen.  
40 Informed consent was obtained from the respondents and confidentiality of personal  
41 disclosures was re-assured. The self-administered questionnaires were distributed and  
42 retrieved between February and March 2018. A final 767 questionnaires were returned for  
43 analyses; 75 questionnaires were omitted due to missing values.  
44  
45  
46  
47  
48  
49  
50  
51  
52  
53

### 54 **Statistical analysis**

55  
56  
57 The data was analysed using Statistical Package for Social Science (SPSS) version 22.  
58 Descriptive outputs were generated describing the median, interquartile range, frequency  
59  
60

1  
2  
3 counts and percentages. Chi square test and multiple logistic regression was performed to test  
4  
5 the hypothesis of the study on  $p < 0.05$  for all statistical tests. The variables selected to be  
6  
7 included in the multivariate analysis were variables with  $p < 0.25$  in the univariate analysis,  
8  
9 and gender, age, and type of profession were also included.  
10  
11  
12  
13  
14

### 15 **Patient and Public Involvement**

16  
17 Patients and the general public were not involved in the conduct of this research.  
18  
19 HCW were involved during the pilot study in order to test the understanding of the written  
20  
21 questionnaire. In addition, data was assessable by the researchers and is stored in a secure file  
22  
23 in the computer and online storage.  
24  
25  
26  
27  
28  
29  
30

### 31 **Results:**

#### 32 **Socio-demographics Characteristics**

33  
34 Responses were collected from 692 HCW (response rate 63.3%), where 311 (44.9%)  
35  
36 were doctors and 381 (55.1%) were nurses. Most of the female participants were nurses at  
37  
38 64.5%. More doctors (56.6%) had  $>5$  years of experience at their current place of work, as  
39  
40 compared to nurses (40.9%). The average age of participants was 31.96 (Standard Deviation  
41  
42 [SD] 7.46) years across the two occupations. Out of the 65.9% who had dependents, i.e.,  
43  
44 having to take-care of child or elderly persons, 73.9% reported to have support to care for  
45  
46 their dependents in a case of a disaster. The percentages were almost equally distributed  
47  
48 between doctors and nurses.  
49  
50  
51  
52  
53  
54  
55  
56  
57  
58  
59  
60



## Professional and Intrapersonal Characteristics

Table 1 describes the socio-demographic, professional, intrapersonal, and willingness characteristics of respondents. Only 39.2% of the HCW had any previous training in dealing with disasters. This was the same for previous work experience, where only 35.8% of the participants had previous work experience in a disaster situation.

The doctors and nurses reported a high trust in work safety, in family, in colleague's preparedness to react, and in their hospital's preparedness to react in case of a disaster, with trust in colleague's preparedness as the highest percentage (88.3%). Similarly, HCW had a high median score (16; IQR 2) in self-efficacy construct.

## Respondents' willingness

Ninety percent of the participants expressed high willingness to participate in any type of disasters. However, they were less willing to participate in natural disasters (77.3%) and influenza pandemic (66.0%) (Table 1).

[Table 1]

## Analysis of Self-efficacy's factors

There were four items in the self-efficacy construct. After the data collection, the inter-correlation value of self- efficacy was tested before running the main analysis. The descriptive statistics and inter-item correlation values of the self-efficacy construct are presented in Table 2.

[Table 2]

1  
2  
3 Based on Table 2, there was a moderate level of agreement in all the four items. The  
4  
5 highest correlation for each item with at least one other item in the construct was between 0.3  
6  
7 and 0.9. In factor analysis, the Kaiser-Meyer-Olkin (KMO) value was 0.658 ( $p < 0.001$ ), KMO  
8  
9 value close to 1, so the variables are suitable for factor analysis. Therefore, a single factor  
10  
11 was formed from the four items computed, and it was saved as incentive to be used in further  
12  
13 analysis. Accordingly, to calculate the self- efficacy, four questions was asked. The sum  
14  
15 outcome of the four answers ranged from 4 to 20 (Median 16, Interquartile range [IQR] 5).  
16  
17  
18  
19  
20  
21

### 22 **Factors associated with willingness to participate in any type disaster**

23  
24  
25 There was an association between participants' gender and willingness to participate  
26  
27 in any type of disaster, with males being more willing compared to females (crude  
28  
29 OR=2.161, 95%CI: 1.307 to 3.573) (Table 3). Those with high trust in work safety (crude  
30  
31 OR=3.284, 95%CI: 1.937 to 5.567), trust in colleague's preparedness (crude OR=2.592,  
32  
33 95%CI: 1.401 to 4.795) and self-efficacy (crude OR=1.358; 95%CI: 1.247 to 1.479) were  
34  
35 also found to be more willing to participate in any type of disaster in the univariate analysis  
36  
37 (Table 3).  
38  
39  
40

41 In the final model, having trust in work safety (adjusted OR=2.535, 95%CI: 1.357 to  
42  
43 4.736) and self-efficacy (adjusted OR=1.319, 95%CI: 1.197 to 1.453) were found to be  
44  
45 associated with general willingness with any type of disasters (Table 4).  
46  
47  
48  
49  
50

### 51 **Factors associated with willingness to participate in natural disaster**

52  
53  
54 In the univariate analysis, there was an association between some of the socio-  
55  
56 demographic characteristics (age, gender, education level, type of profession and work  
57  
58 duration) with willingness to participate in natural disasters. Participants with bachelor and  
59  
60

1  
2  
3 postgraduate degrees had a higher odd of willingness to participate in natural disasters  
4  
5 compared to those with a diploma education. Those in the age group of between 31 and 45  
6  
7 years were found to be more willing when compared to participants who were  $\leq 30$  years old.  
8  
9  
10 The main intrapersonal factors associated with willingness in natural disasters were  
11  
12 participants' trust in colleagues' preparedness in case of a natural disaster, and self-efficacy  
13  
14 (Table 3).  
15

16  
17 In multivariate, being male (adjusted OR=1.639, 95%CI: 1.102 to 2.439) and self-  
18  
19 efficacy (adjusted OR=1.143, 95%CI: 1.069 to 1.221) were significantly associated with  
20  
21 willingness to participate in natural disasters (Table 4).  
22  
23  
24  
25  
26  
27

### 28 **Factors associated with willingness to participate in influenza pandemic disaster**

29  
30 For willingness to participate in an influenza pandemic, the univariate results revealed  
31  
32 that being male, having a dependent with no support (compared to participants without a  
33  
34 dependent), having previous experience and self-efficacy were associated with willingness to  
35  
36 participate in a pandemic (Table 3).  
37  
38  
39

40 In the final model, having previous experience (adjusted OR=1.528, 95%CI: 1.058 to  
41  
42 2.207) and self-efficacy (adjusted OR=1.114, 95%CI: 1.050 to 1.182) were found to be  
43  
44 associated with willingness to participate in influenza pandemic (Table 4).  
45  
46  
47

48 [Table 3, Table 4]  
49  
50  
51  
52  
53  
54  
55  
56  
57  
58  
59  
60

## Discussion:

The study's main question is to test the strength and direction of the association between the independent variables- socio-demographic, professional, and intrapersonal variables- with the variables of willingness to participate in three different types of disasters. The results showed that trust in work safety and self-efficacy were associated with disaster participation willingness after in the multivariate analysis. Gender and self-efficacy were found to be significantly associated with willingness to participate in natural disasters. However, previous experience and self-efficacy were statistically significant with willingness of HCW to participate in an influenza pandemic.

It is difficult to obtain a one hundred percent participation of HCW even though it is vital in case of disasters. Previous studies suggested that between 65 and 97 percent of HCW were willing to participate in a natural disaster, and between 54 and 86 percent in an influenza pandemic.<sup>11,16,20,21</sup> The reason for this difference in the levels of willingness between the two types of disasters is due to the great distinction in their nature. The outcome of the interaction between HCW and the socio-environmental determinants of these disasters leads to having different willingness levels. According to Connor et al., (2014) the weighted risk resulting from this interaction plays a major role in HCW willingness.<sup>10</sup> In the case of pandemics, the fear of the inability to control biohazards and watching colleagues acquiring a communicable disease after contact with affected persons was a suggested reason for the low willingness levels.<sup>10</sup> Another qualitative study in Australia highlighted that in different types of disasters emergency nurses' willingness to attend to work is shaped by the weighted risk to self and surrounding people and the pressure formed from the period dealing with the disaster.<sup>12</sup> Natural disasters may not directly affect HCW or their families like the influenza

1  
2  
3 pandemic which may be a reason for the higher level of willingness to attend to work  
4  
5 compared to pandemics.  
6  
7

8 The findings of this study are consistent with the previous studies regarding their  
9  
10 willingness level to different types of disasters. More HCW were willing to participate in  
11  
12 natural disasters (77.3%) as compared to influenza pandemics (66.0%). Nevertheless, even  
13  
14 though there was a higher percentage of HCW willingness in this study to participate in both  
15  
16 types of disasters compared to other studies, Yemen's high vulnerability, due its topography  
17  
18 and current economic, political and health status, could affect the country's health status and  
19  
20 cause huge adverse health impacts when disasters occur. According to the Vulnerability  
21  
22 Matrix, one third of Yemen's districts are highly vulnerable.<sup>5</sup>  
23  
24  
25

26  
27 Subsequently, due to the armed conflicts in Yemen that started in early 2015, it has  
28  
29 become difficult to deal with any disaster that may occur. According to the World Health  
30  
31 Organization (WHO), the healthcare system in Yemen is in a critical situation with about  
32  
33 50% of the health facilities in Yemen being either partially or totally damaged as a result of  
34  
35 the natural disasters and conflicts. Furthermore, of the 3,507 healthcare facilities in Yemen,  
36  
37 almost 300 healthcare facilities have been destroyed.<sup>5,22</sup> Therefore, any possible decrease in  
38  
39 the health work force during disasters in Yemen must be considered. The existing drained  
40  
41 health sector is based on a vulnerable health system in terms of its structure and healthcare  
42  
43 staff number and distribution in the country.<sup>23</sup> Thus, training and preparing healthcare staff to  
44  
45 act during disasters is critical and could help achieve Priority 4 in the United Nations' Sendai  
46  
47 Framework for Disaster Risk Reduction 2015-2030 in enhancing disaster preparedness for  
48  
49 effective response and to "Build Back Better" in recovery, rehabilitation and reconstruction  
50  
51 of disasters, and further prevent any possible humanitarian catastrophe.<sup>24</sup>  
52  
53  
54  
55  
56

57 The results show that willingness to participate in events of natural disasters may be  
58  
59 encouraged by many suggested factors. Factors such as respondents being male are  
60

1  
2  
3 accompanied with higher willingness to participate in natural disasters. The findings are  
4 similar to previous studies conducted in Jordan, China and the United States of  
5 America.<sup>15,16,25,26</sup> However, having less female health workers who are willing to participate  
6 in disasters highlight a need to address this group during health preparedness programs. This  
7 lack in female HCW willingness could be due to the gender and cultural barriers in Yemen.  
8 These barriers need to be addressed to better motivate female workers participation in  
9 disasters. This is an important area for research as studies on willingness are moving forward.

10  
11  
12  
13  
14  
15  
16  
17  
18  
19  
20 As noted in previous studies, nurses and doctors with previous experience in influenza  
21 pandemics are ever willing to participate in influenza pandemics.<sup>14, 25</sup> HCW who have  
22 experience working with previous disaster have a better knowledge in disaster management,  
23 coping strategies, and ways to protect themselves and their families; which may be a reason  
24 for having higher odds of willingness to participate. According to Alzahrani et al., (2017)  
25 most of the nurses have a higher level in Mass gatherings management such as  
26 communicating effectively during emergencies in Saudi Arabia due to Previous experience.<sup>27</sup>  
27 He also found a need for further trainings by the nurses. Similarly, Chokshi et al., (2008)  
28 found that simulation training, attending conferences and previous experience increase  
29 paediatric surgeons' feeling of preparedness.<sup>14</sup>

30  
31  
32  
33  
34  
35  
36  
37  
38  
39  
40  
41  
42  
43 This study found that the trust in work safety during any type of disaster plays a key  
44 role in the willingness to participate, which is similar to the results from previous  
45 studies.<sup>11,25,28</sup> Work safety is important in order for HCW to feel safe and do their work. A  
46 study by Stergachis et al., (2011) found that the majority of the participants reported their fear  
47 or concern for self in case of influenza pandemic and during earthquake scenarios as one of  
48 the major barriers to willingness to participate.<sup>29</sup> In Yemen, work safety in disaster  
49 preparedness is concerning after notifications made by Aladhrai et al.,(2015) and Naser et  
50 al., (2018) on the current low work place safety and the needs of increasing safety and  
51  
52  
53  
54  
55  
56  
57  
58  
59  
60

1  
2  
3 security standards in Yemen's Health establishments.<sup>7,8</sup> Whether it is external or internal  
4 catastrophe, unsafe work place could lead to increase optional absenteeism during disaster.  
5  
6 Thus, disseminating information on work safety and protection devices during several types  
7  
8 of disasters is advisable.  
9  
10

11  
12  
13 Many studies have established the association between self-efficacy and willingness  
14 to participate in disasters.<sup>10,15,16</sup> Similarly, this study has identified that self-efficacy plays an  
15 important role in the willingness to participate in natural disasters, in influenza pandemic and  
16 any type of disasters. It indicates that elements tested for self-efficacy like participants  
17 increase in familiarity with their role, responsibility to react, and being confident of their  
18 ability to deal with various types of disasters could be a key factor to increase HCW self-  
19 efficacy. Thus, their willingness to participate will also increase. Disaster preparedness  
20 trainings are encouraged to contain materials that explain the responses to the different types  
21 of disasters, doctors' and nurses' role in disasters and how it makes a difference in  
22 responding to disasters. Supportive measures to increase HCW self-efficacy such as  
23 immediate communication with much needed information and rewards for efforts in disasters  
24 are suggested.  
25  
26  
27  
28  
29  
30  
31  
32  
33  
34  
35  
36  
37  
38  
39  
40

41 Although the study faced challenges in the collection of data during the political  
42 unrest in the country, data was collected from three of the major public hospitals. The quality  
43 of data was ensured by researcher explaining the study and its objectives and answering any  
44 questions that may arise. This prevented differences in understanding the questions and  
45 increased participants' inclusion in the study. All in all, the study suggested the vital value of  
46 increasing self-efficacy and its elements in order to obtain more willingness participants.  
47  
48  
49  
50  
51  
52  
53  
54  
55  
56  
57  
58  
59  
60

## Strengths and limitations

This is the first study to explore the patterns and associated factors of the willingness status to participate in disasters among healthcare workers in Yemen. The response rate was also high as the questionnaire was distributed personally by the researcher. The questionnaire was pilot tested to ensure the validity of the questionnaire.

This study had some limitations. As the study was performed under a political insecurity/fragile state of the country and a list of workers of HCW working at the hospitals was difficult to obtain. As a result, a universal sample was undertaken which could limit the study of representativeness. This is a cross-sectional study using a self-administered questionnaire, where the actual willingness of the respondents cannot be ascertained. The respondents may answer positively due to social desirability bias. Other than the self-administrated questionnaire limitations, the findings of the study are limited to staff working at the tertiary level public hospitals in urban areas of Yemen.

## Conclusion:

Increasing the likelihood of willingness to participate in disasters play a key role in guarantying the optimum number of work force. This study indicates that one's socio-demographic, professional and intrapersonal factors play a role in increasing his/her willingness in general and across different types of disasters. Significant differences were revealed between participants' willingness in natural disasters by gender and self-efficacy, and participant's willingness in influenza pandemics by previous experience and self-efficacy. This result suggests integrating disaster management to doctors' and nurses' in the early stages of their educational curriculums. This could be achieved by adding early



1  
2  
3 exposure of healthcare workers to relevant disaster experiences which would further boost  
4  
5 their willingness to participate in disaster response.  
6  
7

8           Other areas for preparedness may include increasing hospitals safety and resilience;  
9  
10 hence that willingness to participate in natural disasters' response was influenced by the  
11  
12 demographic characteristic of the healthcare personnel. Additionally, others found outside the  
13  
14 bracket should be motivated to participate with a reward package such as incentives and  
15  
16 hazard allowance. Further studies should also be conducted in both urban and rural settings  
17  
18 with a relatively peaceful atmosphere.  
19  
20  
21  
22  
23  
24

25 **Acknowledgement:** We thank Dr. Susan Connor, Dr. Karen Hammad and Dr.  
26  
27 Mohammed Khalil for their support and advice during the study development, all of the  
28  
29 University Malaya academic staff, the team who collected the data, and all the participants  
30  
31 who contributed in this study.  
32  
33  
34

35 **Competing interests:** None declared  
36  
37

38 **Funding:** The authors have no financial disclosures to declare. This research did not  
39  
40 receive any specific grant from funding agencies in the public, commercial, or not-for-profit  
41  
42 sectors.  
43  
44  
45

46 **Data sharing statement:** This is an anonymous gathered survey; the data are the  
47  
48 responses from the participants. The data have been grouped and presented in the manuscript.  
49  
50  
51  
52  
53  
54  
55  
56  
57  
58  
59  
60

**Reference:**

1. United Nations Economic and Social Commission for Asia and the Pacific. Disasters in Asia and the Pacific: 2015 year in review. United Nations report. Economic and social commission for Asia and the Pacific. 2015. [21 p.]. Available from: <https://www.unescap.org/resources/disasters-asia-and-pacific-2015-year-review>
2. Below R, Wirtz A, Guha-Sapir D. Disaster category classification and peril terminology for operational purposes. Centre for Research on the Epidemiology of Disasters. 2009. Available from: <https://www.cred.be/node/564>
3. Joseph, B., & Joseph, M. (2016). The health of the healthcare workers. Indian journal of occupational and environmental medicine, 20(2), 71–72. doi:10.4103/0019-5278.197518.
4. Ministry of Water and Environment. Yemen: National progress report on the implementation of the Hyogo Framework for Action (2013-2015). 2015. Available from: <http://preventionweb.net/go/40141>
5. World Health Organization. WHO annual report 2017: Yemen. Cairo: WHO Regional Office for the Eastern Mediterranean; 2018. Licence: CC BYNC-SA 3.0 IGO.
6. Banerjee, Aditi; Bhavnani, Rakhi; Burtonboy, Catherine H, et al. Natural Disasters in the Middle East and North Africa: A Regional Overview. The International Bank for Reconstruction and Development / The World Bank. [101 p.]. 2014; Report No.: 81658.
7. Aladhrai SA, Djalali A, Della Corte F, Alsabri M, El-Bakri NK, Ingrassia PL. Impact of the 2011 Revolution on Hospital Disaster Preparedness in Yemen. Disaster Medicine and Public Health Preparedness. 2015;9(4):396-402.
8. Naser WN, Ingrassia PL, Aladhrae S, Abdulraheem WA. A Study of Hospital Disaster Preparedness in South Yemen. Prehospital and Disaster Medicine. 2018;33(2):133.
9. Chaffee M. Willingness of health care personnel to work in a disaster: an integrative review of the literature. Disaster Medicine and Public Health Preparedness. 2009;3(1):42-56.

10. Connor SB. When and why health care personnel respond to a disaster: the state of the science. *Prehospital and Disaster Medicine*. 2014;29(3):270-4.
11. Gowing JR, Walker KN, Elmer SL, Cummings EA. Disaster Preparedness among Health Professionals and Support Staff: What is Effective? An Integrative Literature Review. *Prehospital and Disaster Medicine*. 2017;32(3):321-8.
12. Arbon P, Cusack L, Ranse J, Shaban RZ, Considine J, Kako M, et al. Exploring staff willingness to attend work during a disaster: a study of nurses employed in four Australian emergency departments. *Australasian Emergency Nursing Journal : AENJ*. 2013;16(3):103-9.
13. Ejeta LT, Ardalan A, Paton D. Application of Behavioral Theories to Disaster and Emergency Health Preparedness: A Systematic Review. *PLOS Currents Disasters*. 2015;7. Doi: 10.1371/currents.dis.31a8995ced321301466db400f1357829.
14. Chokshi NK, Behar S, Nager AL, Dorey F, Upperman JS. Disaster management among pediatric surgeons: preparedness, training and involvement. *American Journal of Disaster Medicine*. 2008;3(1):5-14.
15. Burke RV, Goodhue CJ, Chokshi NK, Upperman JS. Factors associated with willingness to respond to a disaster: a study of healthcare workers in a tertiary setting. *Prehospital and Disaster Medicine*. 2011;26(4):244-50.
16. Charney RL, Rebmann T, Flood RG. Hospital Employee Willingness to Work during Earthquakes Versus Pandemics. *Journal of Emergency Medicine*. 2015;49(5):665-74. Doi: <https://doi.org/10.1016/j.jemermed.2015.07.030>.
17. Balicer RD, Omer SB, Barnett DJ, Everly GS, Jr. Local public health workers' perceptions toward responding to an influenza pandemic. *BMC Public Health*. 2006;6:99.
18. Shapira S, Aharonson-Daniel L, Bar-Dayyan Y, Sykes D, Adini B. Knowledge, perceptions, attitudes and willingness to report to work in an earthquake: A pilot study comparing Canadian versus Israeli hospital nursing staff. *International Emergency Nursing*. 2016;25:7-12.
19. Bandura A. *Self-efficacy: The exercise of control*: Macmillan; 1997.
20. Arbon P, Ranse J, Cusack L, Considine J, Shaban RZ, Woodman RJ, et al. Australasian emergency nurses' willingness to attend work in a disaster: a survey. *Australasian Emergency Nursing Journal : AENJ*. 2013;16(2):52-7.

- 1  
2  
3 21. Brice JH, Gregg D, Sawyer D, Cyr JM. Survey of Hospital Employees' Personal  
4 Preparedness and Willingness to Work Following a Disaster. *Southern Medical*  
5 *Journal*. 2017;110(8):516-22.  
6  
7
- 8 22. United Nations Office for the Coordination of Humanitarian Affairs. *Humanitarian*  
9 *Bulletin Yemen/ Health system on the verge of collapse*. 2015. [4 p.]. Available  
10 from: [http://reliefweb.int/report/yemen/yemen-humanitarian-bulletin-issue-6-issued-](http://reliefweb.int/report/yemen/yemen-humanitarian-bulletin-issue-6-issued-30-november-2015-enar)  
11 [30-november-2015-enar](http://reliefweb.int/report/yemen/yemen-humanitarian-bulletin-issue-6-issued-30-november-2015-enar)  
12  
13
- 14 23. Qirbi N, Ismail SA. Health system functionality in a low-income country in the  
15 midst of conflict: the case of Yemen. *Health Policy and Planning*. 2017;32(6):911-  
16 22.  
17  
18
- 19 24. United Nations - Headquarters. *Sendai Framework for Disaster Risk Reduction*  
20 *2015-2030*. United Nations Office for Disaster Risk Reduction. 2015. [32 p.].  
21 Available from: <https://www.unisdr.org/we/inform/publications/43291>  
22  
23
- 24 25. Loke AY, Fung WM, Liu X. Mainland China nurses' willingness to report to work  
25 in a disaster. *American Journal of Disaster Medicine*. 2013;8(4):273-82. Doi:  
26 [10.5055/ajdm.2013.0134](https://doi.org/10.5055/ajdm.2013.0134).  
27  
28
- 29 26. Al Khalaileh MA, Bond E, Alasad JA. Jordanian nurses' perceptions of their  
30 preparedness for disaster management. *International emergency nursing*.  
31 *2012;20(1):14-23*.  
32  
33
- 34 27. Alzahrani F, Yiannis K. Emergency nurse disaster preparedness during mass  
35 gatherings: a cross-sectional survey of emergency nurses' perceptions in hospitals in  
36 Mecca, Saudi Arabia. *BMJ Open*. 2017;7(4):e013563.  
37  
38
- 39 28. Ogedegbe C, Nyirenda T, Delmoro G, Yamin E, Feldman J. Health care workers  
40 and disaster preparedness: barriers to and facilitators of willingness to respond.  
41 *International Journal of Emergency Medicine*. 2012;5(1):29.  
42  
43
- 44 29. Stergachis A, Garberson L, Lien O, D'Ambrosio L, Sangare L, Dold C. Health care  
45 workers' ability and willingness to report to work during public health emergencies.  
46 *Disaster Medicine and Public Health Preparedness*. 2011;5(4):300-8.  
47  
48  
49  
50  
51  
52  
53  
54  
55  
56  
57  
58  
59  
60

**Table 1: Socio-demographic, professional, intrapersonal, and willingness Characteristics of Respondents**

| Variable                                             |                                      | Frequency (n= 692) | Percentage (%) |
|------------------------------------------------------|--------------------------------------|--------------------|----------------|
| Age (years)                                          | ≤30                                  | 360                | 52.0           |
|                                                      | 31-45                                | 294                | 42.5           |
|                                                      | ≥46                                  | 38                 | 5.5            |
| Gender                                               | Male                                 | 419                | 60.5           |
|                                                      | Female                               | 273                | 39.5           |
| Marital-status                                       | Single                               | 258                | 37.3           |
|                                                      | Married                              | 420                | 60.7           |
|                                                      | Divorce                              | 8                  | 1.2            |
|                                                      | Widow                                | 6                  | 0.9            |
| Education-level                                      | Diploma                              | 280                | 40.5           |
|                                                      | Bachelor                             | 275                | 39.7           |
|                                                      | Post graduate education              | 137                | 19.8           |
|                                                      | Master                               | 104                | 15.0           |
| Professional                                         | 33                                   | 4.8                |                |
| Profession type                                      | Doctors                              | 311                | 44.9           |
|                                                      | Specialist medical practitioner      | 126                | 8.2            |
|                                                      | General medical practitioner         | 185                | 26.7           |
|                                                      | Nurses                               | 381                | 55.1           |
| Work duration (years)                                | ≤5                                   | 360                | 52             |
|                                                      | 6-10                                 | 213                | 30.8           |
|                                                      | 11-15                                | 76                 | 11.0           |
|                                                      | ≥16                                  | 43                 | 6.2            |
| Dependent                                            | With dependent                       | 456                | 65.9           |
|                                                      | Elder                                | 65                 | 9.4            |
|                                                      | Child                                | 276                | 39.9           |
|                                                      | Both                                 | 115                | 16.6           |
|                                                      | No dependent                         | 236                | 34.1           |
| <sup>a</sup> Support                                 | No                                   | 119                | 26.1           |
|                                                      | Yes                                  | 337                | 73.9           |
| <sup>b</sup> Previous training                       | With previous training               | 271                | 39.2           |
|                                                      | Without previous training            | 421                | 60.8           |
| <sup>b</sup> Previous experience                     | With previous experience             | 248                | 35.8           |
|                                                      | Without previous training            | 444                | 64.2           |
| Trust in work safety in case of disaster             | High trust in work safety            | 563                | 81.4           |
|                                                      | Low trust in work safety             | 129                | 18.6           |
| Trust in family preparedness in case of a disaster   | High trust in family preparedness    | 544                | 78.6           |
|                                                      | Low trust in family preparedness     | 148                | 21.4           |
| Trust in colleague preparedness to react in disaster | High trust in colleague preparedness | 611                | 88.3           |
|                                                      | Low trust in colleague preparedness  | 81                 | 11.7           |

|                                                      |                                     |     |      |
|------------------------------------------------------|-------------------------------------|-----|------|
| Trust in hospital preparedness to react in disaster  | High trust in hospital preparedness | 522 | 75.4 |
|                                                      | Low trust in hospital preparedness  | 170 | 24.6 |
| Self-efficacy score (Median; Inter-Quartile)         |                                     | 16  | 5    |
| Willingness to participate in Any type of disaster   | High                                | 623 | 90.0 |
|                                                      | Low                                 | 69  | 10.0 |
| Willingness to participate in Natural disaster       | High                                | 535 | 77.3 |
|                                                      | Low                                 | 157 | 22.7 |
| Willingness to participate in Influenza and Pandemic | High                                | 457 | 66.0 |
|                                                      | Low                                 | 235 | 34.0 |

<sup>a</sup>Only for participants with dependants. The percentages are only within participants with dependents.

<sup>b</sup>Previous experience and training in disasters

**Table 2: Descriptive statistics and inter-term correlation for items in self-efficacy**

| Items                                 | Descriptive statistics |       | Inter-item correlation |        |        |        |
|---------------------------------------|------------------------|-------|------------------------|--------|--------|--------|
|                                       | Mean                   | SD    | item 1                 | item 2 | item 3 | item 4 |
| Item 1: Ability to perform work       | 3.36                   | 1.074 | 1.000                  | 0.592  | 0.267  | 0.259  |
| Item 2: Familiarity with their role   | 3.62                   | 1.085 | 0.592                  | 1.000  | 0.325  | 0.324  |
| Item 3: Responsibility to participate | 4.23                   | 0.929 | 0.267                  | 0.325  | 1.000  | 0.390  |
| Item 4: Ability report to work        | 4.03                   | 1.062 | 0.259                  | 0.324  | 0.390  | 1.000  |

For peer review only

**Table 3: Univariate association of crude socio-demographic, professional and intrapersonal characteristics with willingness in any type of disaster, in natural disasters, or in influenza pandemic**

| Variable                        | Willingness to participate in any type of disasters |              | Willingness to participate in natural disasters |                  | Willingness to participate in influenza pandemic |              |
|---------------------------------|-----------------------------------------------------|--------------|-------------------------------------------------|------------------|--------------------------------------------------|--------------|
|                                 | Odds ratio                                          | p-value      | Odds ratio                                      | p-value          | Odds ratio                                       | p-value      |
|                                 | (95% C.I.)                                          |              | (95% C.I.)                                      |                  | (95% C.I.)                                       |              |
| <b>Age</b>                      |                                                     |              |                                                 |                  |                                                  |              |
| ≤30                             | 1                                                   | 1            | 1                                               | 1                | 1                                                | 1            |
| 31-45                           | 1.056 (0.628-1.775)                                 | 0.838        | <b>1.639</b> (1.126-2.387)                      | <b>0.010</b>     | 1.138 (0.822-1.576)                              | 0.437        |
| ≥46                             | 0.733 (0.269-1.997)                                 | 0.544        | 1.967 (0.798-4.850)                             | 0.142            | 1.354 (0.650-2.820)                              | 0.418        |
| <b>Gender</b>                   |                                                     |              |                                                 |                  |                                                  |              |
| Female                          | 1                                                   | 1            | 1                                               | 1                | 1                                                | 1            |
| Male                            | <b>2.161</b> (1.307-3.573)                          | <b>0.003</b> | <b>2.254</b> (1.571-3.234)                      | <b>&lt;0.001</b> | <b>1.505</b> (1.093-2.072)                       | <b>0.012</b> |
| <b>Marital status</b>           |                                                     |              |                                                 |                  |                                                  |              |
| Single                          | 1                                                   | 1            | 1                                               | 1                | 1                                                | 1            |
| Married                         | 0.899 (0.532-1.521)                                 | 0.692        | 1.128 (0.781-1.629)                             | 0.521            | 1.090 (0.787-1.510)                              | 0.605        |
| Divorce and widow               | 0.615 (0.130-2.913)                                 | 0.541        | 1.160 (0.314-4.291)                             | 0.824            | 1.362 (0.416-4.466)                              | 0.610        |
| <b>Education Level</b>          |                                                     |              |                                                 |                  |                                                  |              |
| Up to Diploma                   | 1                                                   | 1            | 1                                               | 1                | 1                                                | 1            |
| Up to Bachelor                  | 1.380 (0.775-2.458)                                 | 0.274        | <b>1.962</b> (1.317-2.922)                      | <b>0.001</b>     | 1.221 (0.858-1.738)                              | 0.268        |
| Up to Postgraduate              | 0.847 (0.450-1.596)                                 | 0.608        | <b>2.279</b> (1.351-3.842)                      | <b>0.002</b>     | 0.998 (0.651-1.528)                              | 0.992        |
| <b>Profession type</b>          |                                                     |              |                                                 |                  |                                                  |              |
| Nurses                          | 1                                                   | 1            | 1                                               | 1                | 1                                                | 1            |
| General medical practitioner    | 1.473 (0.781-2.776)                                 | 0.231        | <b>1.554</b> (1.013-2.384)                      | <b>0.044</b>     | 0.756 (0.524-1.091)                              | 0.135        |
| Specialist medical practitioner | 0.965 (0.507-1.835)                                 | 0.913        | <b>2.407</b> (1.377-4.208)                      | <b>0.002</b>     | 0.942 (0.614-1.446)                              | 0.785        |
| <b>Work duration</b>            |                                                     |              |                                                 |                  |                                                  |              |



|                                          |                            |                  |                            |                  |                            |                  |   |
|------------------------------------------|----------------------------|------------------|----------------------------|------------------|----------------------------|------------------|---|
| ≤5                                       | 1                          | 1                | 1                          | 1                | 1                          | 1                | 1 |
| 6-10                                     | 1.006 (0.563-1.798)        | 0.983            | 1.079 (0.721-1.614)        | 0.711            | 0.975 (0.683-1.392)        | 0.889            |   |
| 11-15                                    | 1.028 (0.438-2.415)        | 0.949            | <b>2.337</b> (1.118-4.882) | <b>0.024</b>     | 1.059 (0.626-1.791)        | 0.832            |   |
| ≥16                                      | 0.456 (0.196-1.063)        | 0.069            | 0.650 (0.329-1.286)        | 0.216            | 1.198 (0.603-2.379)        | 0.606            |   |
| <b>Presence of dependent</b>             |                            |                  |                            |                  |                            |                  |   |
| No dependent                             | 1                          | 1                | 1                          | 1                | 1                          | 1                |   |
| Dependent with no support                | 0.673 (0.346-1.308)        | 0.242            | 1.149 (0.683-1.933)        | 0.601            | <b>1.617</b> (1.000-2.612) | <b>0.050</b>     |   |
| Dependent with support                   | 1.253 (0.707-2.222)        | 0.439            | 1.305 (0.880-1.935)        | 0.185            | 1.283 (0.907-1.815)        | 0.158            |   |
| <b><sup>a</sup>Previous training</b>     |                            |                  |                            |                  |                            |                  |   |
| No                                       | 1                          | 1                | 1                          | 1                | 1                          | 1                |   |
| Yes                                      | 1.653 (0.959-2.849)        | 0.070            | 1.090 (0.756-1.573)        | 0.644            | 1.147 (0.829-1.585)        | 0.408            |   |
| <b><sup>a</sup>Previous experience</b>   |                            |                  |                            |                  |                            |                  |   |
| No                                       | 1                          | 1                | 1                          | 1                | 1                          | 1                |   |
| Yes                                      | 1.216 (0.714-2.070)        | 0.471            | 0.974 (0.673-1.411)        | 0.889            | <b>1.857</b> (1.317-2.619) | <b>&lt;0.001</b> |   |
| <b>Trust in work safety</b>              |                            |                  |                            |                  |                            |                  |   |
| Low                                      | 1                          | 1                | 1                          | 1                | 1                          | 1                |   |
| High                                     | <b>3.284</b> (1.937-5.567) | <b>&lt;0.001</b> | 1.280 (0.825-1.987)        | 0.271            | 1.192 (0.800-1.774)        | 0.388            |   |
| <b>Trust in family preparedness</b>      |                            |                  |                            |                  |                            |                  |   |
| Low                                      | 1                          | 1                | 1                          | 1                | 1                          | 1                |   |
| High                                     | 1.338 (0.756-2.369)        | 0.317            | 1.292 (0.850-1.963)        | 0.231            | 0.990 (0.674-1.454)        | 0.959            |   |
| <b>Trust in colleague's preparedness</b> |                            |                  |                            |                  |                            |                  |   |
| Low                                      | 1                          | 1                | 1                          | 1                | 1                          | 1                |   |
| High                                     | <b>2.592</b> (1.401-4.795) | <b>0.002</b>     | <b>1.974</b> (1.200-3.246) | <b>0.007</b>     | 1.392 (0.866-2.237)        | 0.172            |   |
| <b>Trust in hospital preparedness</b>    |                            |                  |                            |                  |                            |                  |   |
| Low                                      | 1                          | 1                | 1                          | 1                | 1                          | 1                |   |
| High                                     | 1.392 (0.807-2.400)        | 0.234            | 1.212 (0.810-1.814)        | 0.351            | 1.158 (0.807-1.663)        | 0.426            |   |
| <b><sup>b</sup>Self-efficacy</b>         |                            |                  |                            |                  |                            |                  |   |
|                                          | <b>1.358</b> (1.247-1.479) | <b>&lt;0.001</b> | <b>1.184</b> (1.115-1.257) | <b>&lt;0.001</b> | <b>1.135</b> (1.076-1.197) | <b>&lt;0.001</b> |   |

1  
2  
3  
4  
5  
6  
7  
8  
9  
10  
11  
12  
13  
14  
15  
16  
17  
18  
19  
20  
21  
22  
23  
24  
25  
26  
27  
28  
29  
30  
31  
32  
33  
34  
35  
36  
37  
38  
39  
40  
41  
42  
43  
44  
45  
46

---

<sup>a</sup>Previous experience and training in disasters

<sup>b</sup>*Continuous measure, with one unit increase in self-efficacy*

---

For peer review only

**Table 4: Multivariate association of adjusted professional and intrapersonal characteristics with willingness in any type of disaster, in natural disasters, or in influenza pandemic**

| Variable                        | Willingness to participate in any type of disasters |              | Willingness to participate in natural disasters |              | Willingness to participate in influenza pandemic |         |
|---------------------------------|-----------------------------------------------------|--------------|-------------------------------------------------|--------------|--------------------------------------------------|---------|
|                                 | Odds ratio (95% C.I.)                               | p-value      | Odds ratio (95% C.I.)                           | p-value      | Odds ratio (95% C.I.)                            | p-value |
| <b>Age</b>                      |                                                     |              |                                                 |              |                                                  |         |
| ≤30                             | 1                                                   | 1            | 1                                               | 1            | 1                                                | 1       |
| 31-45                           | 1.137 (0.609-2.121)                                 | 0.687        | 1.432 (0.928-2.209)                             | 0.105        | 1.008 (0.695-1.461)                              | 0.967   |
| ≥46                             | 0.440 (0.136-1.418)                                 | 0.169        | 1.087 (0.409-2.886)                             | 0.867        | 1.062 (0.484-2.332)                              | 0.880   |
| <b>Gender</b>                   |                                                     |              |                                                 |              |                                                  |         |
| Female                          | 1                                                   | 1            | 1                                               | 1            | 1                                                | 1       |
| Male                            | 1.456 (0.807-2.628)                                 | <b>0.212</b> | <b>1.639</b> (1.102-2.439)                      | <b>0.015</b> | 1.131 (0.793-1.612)                              | 0.498   |
| <b>Education Level</b>          |                                                     |              |                                                 |              |                                                  |         |
| Up to Diploma                   | -                                                   | -            | 1                                               | 1            | -                                                | -       |
| Up to Bachelor                  | -                                                   | -            | 1.706 (0.993-2.932)                             | 0.053        | -                                                | -       |
| Up to Postgraduate              | -                                                   | -            | 1.177 (0.522-2.657)                             | 0.695        | -                                                | -       |
| <b>Profession type</b>          |                                                     |              |                                                 |              |                                                  |         |
| Nurses                          | 1                                                   | 1            | 1                                               | 1            | 1                                                | 1       |
| General medical practitioner    | 1.285 (0.438-3.767)                                 | 0.261        | 1.581 (0.691-3.614)                             | 0.278        | 0.751 (0.468-1.205)                              | 0.235   |
| Specialist medical practitioner | 1.392 (0.578-3.352)                                 | 0.644        | 0.939 (0.515-1.713)                             | 0.838        | 0.697 (0.473-1.026)                              | 0.067   |
| <b>Presence of dependent</b>    |                                                     |              |                                                 |              |                                                  |         |
| No dependent                    | -                                                   | -            | -                                               | -            | 1                                                | 1       |
| Dependent with no support       | -                                                   | -            | -                                               | -            | 1.537 (0.910-2.598)                              | 0.108   |
| Dependent with support          | -                                                   | -            | -                                               | -            | 1.154 (0.791-1.685)                              | 0.457   |

1  
2  
3  
4  
5  
6  
7  
8  
9  
10  
11  
12  
13  
14  
15  
16  
17  
18  
19  
20  
21  
22  
23  
24  
25  
26  
27  
28  
29  
30  
31  
32  
33  
34  
35  
36  
37  
38  
39  
40  
41  
42  
43  
44  
45  
46

|                                                                          |                            |                  |                            |                  |                            |                  |
|--------------------------------------------------------------------------|----------------------------|------------------|----------------------------|------------------|----------------------------|------------------|
| <b><sup>a</sup>Previous experience</b>                                   |                            |                  |                            |                  |                            |                  |
| No                                                                       | -                          | -                | -                          | -                | 1                          | 1                |
| Yes                                                                      | -                          | -                | -                          | -                | <b>1.528</b> (1.058-2.207) | <b>0.024</b>     |
| <b>Trust in work safety</b>                                              |                            |                  |                            |                  |                            |                  |
| Low                                                                      | 1                          | 1                | -                          | -                | -                          | -                |
| High                                                                     | <b>2.535</b> (1.357-4.736) | <b>0.004</b>     | -                          | -                | -                          | -                |
| <b>Trust in colleague's preparedness</b>                                 |                            |                  |                            |                  |                            |                  |
| Low                                                                      | 1                          | 1                | 1                          | 1                | -                          | -                |
| High                                                                     | 1.199 (0.576-2.496)        | 0.686            | 1.363 (0.791-2.351)        | 0.265            | -                          | -                |
| <b><sup>b</sup>Self-efficacy</b>                                         | <b>1.319</b> (1.197-1.453) | <b>&lt;0.001</b> | <b>1.143</b> (1.069-1.221) | <b>&lt;0.001</b> | <b>1.114</b> (1.050-1.182) | <b>&lt;0.001</b> |
| <sup>a</sup> Previous experience and training in disasters               |                            |                  |                            |                  |                            |                  |
| <sup>b</sup> Continuous measure, with one unit increase in self-efficacy |                            |                  |                            |                  |                            |                  |

Peer review only

**SECTION ONE:**

Please tick (✓) in the appropriate box

1. **Age:** \_\_\_\_\_

2. **Gender :**

Male

Female

3. **Marital status:**

Single

Married

Divorce

Widow/er

4. **Highest Education level completed :**

Diploma

Bachelor

Masters

Professional

5. **What is your primary job category?**

Specialist medical practitioner

General medical practitioner

Nurse

6. **Duration of work at the hospital:** \_\_\_\_\_ Years.

7. Do you have any of the following responsibilities ( you can choose more than one choice):

Children  Elders  None

8. Do you have any one who can take care of the previously mentioned responsibilities in case of your absence?

Yes  No

**SECTION TWO**

Please tick (✓) in the appropriate box:

1. Have you participated in a disaster before?

Yes  No

2. Have attended any previous disaster trainings?

Yes  No

**SECTION THREE:**

**Part A:**

| NO | Questions                                                           | Strongly disagree (1) | Disagree (2) | Somewhat agree (3) | Agree (4) | Strongly agree (5) |
|----|---------------------------------------------------------------------|-----------------------|--------------|--------------------|-----------|--------------------|
| 1. | I am confident of my personal safety at work in case of a disaster. |                       |              |                    |           |                    |

|    |                                                                                         |  |  |  |  |  |
|----|-----------------------------------------------------------------------------------------|--|--|--|--|--|
|    |                                                                                         |  |  |  |  |  |
| 2. | I am assured that my family is prepared to function in in my absence during a disaster. |  |  |  |  |  |
| 3. | I am sure that my colleagues are able to perform their duties during a disaster.        |  |  |  |  |  |
| 4. | The hospital is prepared to provide effective response in case of a disaster.           |  |  |  |  |  |

**PART B:**

| NO | Statement                                                                                  | Strongly disagree<br>(1) | Disagree<br>(2) | Somewhat agree<br>(3) | Agree<br>(4) | Strongly agree<br>(5) |
|----|--------------------------------------------------------------------------------------------|--------------------------|-----------------|-----------------------|--------------|-----------------------|
| 1. | I am able to treat patients of different type of disasters.                                |                          |                 |                       |              |                       |
| 2. | I am confident that I can perform my role in the hospital following any type of disasters. |                          |                 |                       |              |                       |
| 3. | I feel that it is my duty to work in the event of a disaster.                              |                          |                 |                       |              |                       |
| 4. | I will be able to report to work at the hospital during an event of a disaster.            |                          |                 |                       |              |                       |

1  
2  
3  
4  
5  
6  
7  
8  
9  
10  
11  
12  
13  
14  
15  
16  
17  
18  
19  
20  
21  
22  
23  
24  
25  
26  
27  
28  
29  
30  
31  
32  
33  
34  
35  
36  
37  
38  
39  
40  
41  
42  
43  
44  
45  
46

**SECTION FOUR:**

| NO | Statement                                                                        | Strongly disagree (1) | Disagree (2) | Somewhat agree (3) | Agree (4) | Strongly agree (5) |
|----|----------------------------------------------------------------------------------|-----------------------|--------------|--------------------|-----------|--------------------|
| 1. | I am willing to participate in any type of disaster regardless of its severity   |                       |              |                    |           |                    |
| 2. | I am willing to participate in natural disasters (earthquake, floods or cyclone) |                       |              |                    |           |                    |
| 3. | I am you willing to participate in influenza pandemic                            |                       |              |                    |           |                    |



# Reporting checklist for cross sectional study.

Based on the STROBE cross sectional guidelines.

## Instructions to authors

Complete this checklist by entering the page numbers from your manuscript where readers will find each of the items listed below.

Your article may not currently address all the items on the checklist. Please modify your text to include the missing information. If you are certain that an item does not apply, please write "n/a" and provide a short explanation.

Upload your completed checklist as an extra file when you submit to a journal.

In your methods section, say that you used the STROBE cross sectional reporting guidelines, and cite them as:

von Elm E, Altman DG, Egger M, Pocock SJ, Gotsche PC, Vandenbroucke JP. The Strengthening the Reporting of Observational Studies in Epidemiology (STROBE) Statement: guidelines for reporting observational studies.

|              |                     | Reporting Item                                                                                  | Page Number          |
|--------------|---------------------|-------------------------------------------------------------------------------------------------|----------------------|
| Title        | <a href="#">#1a</a> | Indicate the study's design with a commonly used term in the title or the abstract              | Main document<br>(1) |
| Abstract     | <a href="#">#1b</a> | Provide in the abstract an informative and balanced summary of what was done and what was found | Main document<br>(1) |
| Background / | <a href="#">#2</a>  | Explain the scientific background and rationale for the                                         | Main document        |

|    |                      |                     |                                                            |               |
|----|----------------------|---------------------|------------------------------------------------------------|---------------|
| 1  | rationale            |                     | investigation being reported                               | (3)           |
| 2  |                      |                     |                                                            |               |
| 3  |                      |                     |                                                            |               |
| 4  | Objectives           | <a href="#">#3</a>  | State specific objectives, including any prespecified      | Main document |
| 5  |                      |                     | hypotheses                                                 | (4)           |
| 6  |                      |                     |                                                            |               |
| 7  |                      |                     |                                                            |               |
| 8  |                      |                     |                                                            |               |
| 9  | Study design         | <a href="#">#4</a>  | Present key elements of study design early in the paper    | Main document |
| 10 |                      |                     |                                                            | (4)           |
| 11 |                      |                     |                                                            |               |
| 12 |                      |                     |                                                            |               |
| 13 |                      |                     |                                                            |               |
| 14 | Setting              | <a href="#">#5</a>  | Describe the setting, locations, and relevant dates,       | Main document |
| 15 |                      |                     | including periods of recruitment, exposure, follow-up,     | (4-6)         |
| 16 |                      |                     | and data collection                                        |               |
| 17 |                      |                     |                                                            |               |
| 18 |                      |                     |                                                            |               |
| 19 |                      |                     |                                                            |               |
| 20 |                      |                     |                                                            |               |
| 21 |                      |                     |                                                            |               |
| 22 | Eligibility criteria | <a href="#">#6a</a> | Give the eligibility criteria, and the sources and methods | Main document |
| 23 |                      |                     | of selection of participants.                              | (4)           |
| 24 |                      |                     |                                                            |               |
| 25 |                      |                     |                                                            |               |
| 26 |                      |                     |                                                            |               |
| 27 |                      | <a href="#">#7</a>  | Clearly define all outcomes, exposures, predictors,        | Main document |
| 28 |                      |                     | potential confounders, and effect modifiers. Give          | (5), table1   |
| 29 |                      |                     | diagnostic criteria, if applicable                         | (Page 18)     |
| 30 |                      |                     |                                                            |               |
| 31 |                      |                     |                                                            |               |
| 32 |                      |                     |                                                            |               |
| 33 |                      |                     |                                                            |               |
| 34 |                      |                     |                                                            |               |
| 35 | Data sources /       | <a href="#">#8</a>  | For each variable of interest give sources of data and     | Main document |
| 36 | measurement          |                     | details of methods of assessment (measurement).            | (5)           |
| 37 |                      |                     | Describe comparability of assessment methods if there      |               |
| 38 |                      |                     | is more than one group. Give information separately for    |               |
| 39 |                      |                     | exposed and unexposed groups if applicable.                |               |
| 40 |                      |                     |                                                            |               |
| 41 |                      |                     |                                                            |               |
| 42 |                      |                     |                                                            |               |
| 43 |                      |                     |                                                            |               |
| 44 |                      |                     |                                                            |               |
| 45 |                      |                     |                                                            |               |
| 46 |                      |                     |                                                            |               |
| 47 | Bias                 | <a href="#">#9</a>  | Describe any efforts to address potential sources of bias  | Main document |
| 48 |                      |                     |                                                            | (13)          |
| 49 |                      |                     |                                                            |               |
| 50 |                      |                     |                                                            |               |
| 51 |                      |                     |                                                            |               |
| 52 | Study size           | <a href="#">#10</a> | Explain how the study size was arrived at                  | Main document |
| 53 |                      |                     |                                                            | (4,5)         |
| 54 |                      |                     |                                                            |               |
| 55 |                      |                     |                                                            |               |
| 56 |                      |                     |                                                            |               |
| 57 |                      |                     |                                                            |               |
| 58 | Quantitative         | <a href="#">#11</a> | Explain how quantitative variables were handled in the     | Main document |
| 59 |                      |                     |                                                            |               |
| 60 |                      |                     |                                                            |               |

|    |                  |                                                                                |                |
|----|------------------|--------------------------------------------------------------------------------|----------------|
| 1  | variables        | analyses. If applicable, describe which groupings were                         | (6)            |
| 2  |                  | chosen, and why                                                                |                |
| 3  |                  |                                                                                |                |
| 4  |                  |                                                                                |                |
| 5  |                  |                                                                                |                |
| 6  | Statistical      | <a href="#">#12a</a> Describe all statistical methods, including those used to | Main document  |
| 7  |                  |                                                                                |                |
| 8  | methods          | control for confounding                                                        | (6)            |
| 9  |                  |                                                                                |                |
| 10 |                  |                                                                                |                |
| 11 |                  | <a href="#">#12b</a> Describe any methods used to examine subgroups and        | Main document  |
| 12 |                  |                                                                                |                |
| 13 |                  | interactions                                                                   | (6)            |
| 14 |                  |                                                                                |                |
| 15 |                  |                                                                                |                |
| 16 |                  | <a href="#">#12c</a> Explain how missing data were addressed                   | Main document  |
| 17 |                  |                                                                                |                |
| 18 |                  |                                                                                | (6)            |
| 19 |                  |                                                                                |                |
| 20 |                  |                                                                                |                |
| 21 |                  |                                                                                |                |
| 22 |                  | <a href="#">#12d</a> If applicable, describe analytical methods taking account | Main document  |
| 23 |                  |                                                                                |                |
| 24 |                  | of sampling strategy                                                           | (4, 6)         |
| 25 |                  |                                                                                |                |
| 26 |                  |                                                                                |                |
| 27 |                  | <a href="#">#12e</a> Describe any sensitivity analyses                         |                |
| 28 |                  |                                                                                |                |
| 29 |                  |                                                                                |                |
| 30 | Participants     | <a href="#">#13a</a> Report numbers of individuals at each stage of study—     | Main document  |
| 31 |                  |                                                                                |                |
| 32 |                  | eg numbers potentially eligible, examined for eligibility,                     | (4, 6)         |
| 33 |                  |                                                                                |                |
| 34 |                  | confirmed eligible, included in the study, completing                          |                |
| 35 |                  |                                                                                |                |
| 36 |                  | follow-up, and analysed. Give information separately for                       |                |
| 37 |                  |                                                                                |                |
| 38 |                  | for exposed and unexposed groups if applicable.                                |                |
| 39 |                  |                                                                                |                |
| 40 |                  |                                                                                |                |
| 41 |                  |                                                                                |                |
| 42 |                  | <a href="#">#13b</a> Give reasons for non-participation at each stage          | Main document  |
| 43 |                  |                                                                                |                |
| 44 |                  |                                                                                | (4, 6, 13)     |
| 45 |                  |                                                                                |                |
| 46 |                  |                                                                                |                |
| 47 |                  |                                                                                |                |
| 48 |                  | <a href="#">#13c</a> Consider use of a flow diagram                            |                |
| 49 |                  |                                                                                |                |
| 50 |                  |                                                                                |                |
| 51 | Descriptive data | <a href="#">#14a</a> Give characteristics of study participants (eg            | Main document  |
| 52 |                  |                                                                                |                |
| 53 |                  | demographic, clinical, social) and information on                              | (7,8), table 2 |
| 54 |                  |                                                                                |                |
| 55 |                  | exposures and potential confounders. Give information                          | (page 19, 20)  |
| 56 |                  |                                                                                |                |
| 57 |                  | separately for exposed and unexposed groups if                                 |                |
| 58 |                  |                                                                                |                |
| 59 |                  |                                                                                |                |
| 60 |                  |                                                                                |                |

1 applicable.

|    |                |                      |                                                                         |
|----|----------------|----------------------|-------------------------------------------------------------------------|
| 2  |                |                      |                                                                         |
| 3  |                |                      |                                                                         |
| 4  |                | <a href="#">#14b</a> | Indicate number of participants with missing data for Table 2 (page     |
| 5  |                |                      | each variable of interest 19, 20)                                       |
| 6  |                |                      |                                                                         |
| 7  |                |                      |                                                                         |
| 8  |                |                      |                                                                         |
| 9  | Outcome data   | <a href="#">#15</a>  | Report numbers of outcome events or summary Main document               |
| 10 |                |                      | measures. Give information separately for exposed and (7), table 2      |
| 11 |                |                      | unexposed groups if applicable. (page 19, 20)                           |
| 12 |                |                      |                                                                         |
| 13 |                |                      |                                                                         |
| 14 |                |                      |                                                                         |
| 15 |                |                      |                                                                         |
| 16 | Main results   | <a href="#">#16a</a> | Give unadjusted estimates and, if applicable, Main document             |
| 17 |                |                      | confounder-adjusted estimates and their precision (eg, (8, 9), table 3, |
| 18 |                |                      | 95% confidence interval). Make clear which confounders 4 (page 21-23)   |
| 19 |                |                      | were adjusted for and why they were included                            |
| 20 |                |                      |                                                                         |
| 21 |                |                      |                                                                         |
| 22 |                |                      |                                                                         |
| 23 |                |                      |                                                                         |
| 24 |                |                      |                                                                         |
| 25 |                |                      |                                                                         |
| 26 |                | <a href="#">#16b</a> | Report category boundaries when continuous variables Main document      |
| 27 |                |                      | were categorized 5                                                      |
| 28 |                |                      |                                                                         |
| 29 |                |                      |                                                                         |
| 30 |                |                      |                                                                         |
| 31 |                |                      |                                                                         |
| 32 |                | <a href="#">#16c</a> | If relevant, consider translating estimates of relative risk            |
| 33 |                |                      | into absolute risk for a meaningful time period                         |
| 34 |                |                      |                                                                         |
| 35 |                |                      |                                                                         |
| 36 |                |                      |                                                                         |
| 37 | Other analyses | <a href="#">#17</a>  | Report other analyses done—e.g., analyses of                            |
| 38 |                |                      | subgroups and interactions, and sensitivity analyses                    |
| 39 |                |                      |                                                                         |
| 40 |                |                      |                                                                         |
| 41 |                |                      |                                                                         |
| 42 | Key results    | <a href="#">#18</a>  | Summarise key results with reference to study objectives Main document  |
| 43 |                |                      | (6-9)                                                                   |
| 44 |                |                      |                                                                         |
| 45 |                |                      |                                                                         |
| 46 |                |                      |                                                                         |
| 47 |                |                      |                                                                         |
| 48 | Limitations    | <a href="#">#19</a>  | Discuss limitations of the study, taking into account Main document     |
| 49 |                |                      | sources of potential bias or imprecision. Discuss both (12, 13)         |
| 50 |                |                      | direction and magnitude of any potential bias.                          |
| 51 |                |                      |                                                                         |
| 52 |                |                      |                                                                         |
| 53 |                |                      |                                                                         |
| 54 |                |                      |                                                                         |
| 55 | Interpretation | <a href="#">#20</a>  | Give a cautious overall interpretation considering Main document        |
| 56 |                |                      | objectives, limitations, multiplicity of analyses, results (9-12)       |
| 57 |                |                      |                                                                         |
| 58 |                |                      |                                                                         |
| 59 |                |                      |                                                                         |
| 60 |                |                      |                                                                         |

1 from similar studies, and other relevant evidence.

2  
3  
4 Generalisability [#21](#) Discuss the generalisability (external validity) of the Main document  
5 study results (13)  
6  
7

8  
9 Funding [#22](#) Give the source of funding and the role of the funders for Main document  
10 the present study and, if applicable, for the original study (14)  
11  
12 on which the present article is based  
13  
14  
15

16  
17 The STROBE checklist is distributed under the terms of the Creative Commons Attribution License  
18 CC-BY. This checklist can be completed online using <https://www.goodreports.org/>, a tool made by  
19 the [EQUATOR Network](#) in collaboration with [Penelope.ai](#)  
20  
21  
22  
23  
24  
25  
26  
27  
28  
29  
30  
31  
32  
33  
34  
35  
36  
37  
38  
39  
40  
41  
42  
43  
44  
45  
46  
47  
48  
49  
50  
51  
52  
53  
54  
55  
56  
57  
58  
59  
60
