# Supplementary material for: Factors associated with healthcare workers willingness to participate in disasters: a cross-sectional study in Sana’a, Yemen
Source: PubMed Central journal article supplement — BMJ Open. 2019 Oct 17;9(10):e030547. doi: 10.1136/bmjopen-2019-030547 (PMC6803075; doi:10.1136/bmjopen-2019-030547), 2019-10-17
Supplement: bmjopen-2019-030547supp001.pdf [file bmjopen-2019-030547supp001.pdf]

**SECTION ONE:**

Please tick (✓) in the appropriate box

1. **Age:** \_\_\_\_\_

2. **Gender :**

Male  Female

3. **Marital status:**

Single  Married  Divorce  Widow/er

4. **Highest Education level completed :**

Diploma  Bachelor  Masters  Professional

5. **What is your primary job category?**

Specialist medical practitioner  General medical practitioner   
Nurse

6. **Duration of work at the hospital:** \_\_\_\_\_ Years.

7. Do you have any of the following responsibilities ( you can choose more than one choice):

Children  Elders  None

8. Do you have any one who can take care of the previously mentioned responsibilities in case of your absence?

Yes  No

### SECTION TWO

Please tick (✓) in the appropriate box:

1. Have you participated in a disaster before?

Yes  No

2. Have attended any previous disaster trainings?

Yes  No

### SECTION THREE:

#### Part A:

| NO | Questions                                                           | Strongly disagree<br>(1) | Disagree<br>(2) | Somewhat agree<br>(3) | Agree<br>(4) | Strongly agree<br>(5) |
|----|---------------------------------------------------------------------|--------------------------|-----------------|-----------------------|--------------|-----------------------|
| 1. | I am confident of my personal safety at work in case of a disaster. |                          |                 |                       |              |                       |

|    |                                                                                         |  |  |  |  |  |
|----|-----------------------------------------------------------------------------------------|--|--|--|--|--|
|    |                                                                                         |  |  |  |  |  |
| 2. | I am assured that my family is prepared to function in in my absence during a disaster. |  |  |  |  |  |
| 3. | I am sure that my colleagues are able to perform their duties during a disaster.        |  |  |  |  |  |
| 4. | The hospital is prepared to provide effective response in case of a disaster.           |  |  |  |  |  |

**PART B:**

| NO | Statement                                                                                  | Strongly disagree<br>(1) | Disagree<br>(2) | Somewhat agree<br>(3) | Agree<br>(4) | Strongly agree<br>(5) |
|----|--------------------------------------------------------------------------------------------|--------------------------|-----------------|-----------------------|--------------|-----------------------|
| 1. | I am able to treat patients of different type of disasters.                                |                          |                 |                       |              |                       |
| 2. | I am confident that I can perform my role in the hospital following any type of disasters. |                          |                 |                       |              |                       |
| 3. | I feel that it is my duty to work in the event of a disaster.                              |                          |                 |                       |              |                       |
| 4. | I will be able to report to work at the hospital during an event of a disaster.            |                          |                 |                       |              |                       |

**SECTION FOUR:**

| NO | Statement                                                                        | Strongly disagree<br>(1) | Disagree<br>(2) | Somewhat<br>agree<br>(3) | Agree<br>(4) | Strongly<br>agree<br>(5) |
|----|----------------------------------------------------------------------------------|--------------------------|-----------------|--------------------------|--------------|--------------------------|
| 1. | I am willing to participate in any type of disaster regardless of its severity   |                          |                 |                          |              |                          |
| 2. | I am willing to participate in natural disasters (earthquake, floods or cyclone) |                          |                 |                          |              |                          |
| 3. | I am you willing to participate in influenza pandemic                            |                          |                 |                          |              |                          |
